# Supplementary material for: Purple light-induced Ritter-type reaction of diazophosphonates: access to α-amido-β-keto phosphonates
Source: Royal Society of Chemistry journal article supplement (doi:10.1039/d4ob01212g), 2024-01-01
Supplement: d4ob01212g1.pdf [file d4ob01212g1.pdf]

## Supporting Information

### Purple light-induced Ritter-type reaction on diazophosphonates: access to $\alpha$ -amido- $\beta$ -keto phosphonates

Ramasamy Anandhan\*, Kesavan Prasanth and Pakkirisamy Nithishkumar  
*Department of Organic Chemistry, University of Madras, Guindy Campus,  
Chennai 600 025, India. E-mail: ananthanramasamy@gmail.com*

| <b><u>S. No.</u></b> | <b><u>Table of contents</u></b>         | <b><u>Pages</u></b> |
|----------------------|-----------------------------------------|---------------------|
| <b>1</b>             | <b>General Information</b>              | <b>S2</b>           |
| <b>2</b>             | <b>General Procedures</b>               | <b>S3-S7</b>        |
| <b>3</b>             | <b>Mechanistic Studies</b>              | <b>S4-S6</b>        |
| <b>4</b>             | <b>Characterization of Products</b>     | <b>S8-S15</b>       |
| <b>5</b>             | <b>References</b>                       | <b>S16</b>          |
| <b>6</b>             | <b>NMR and HRMS Spectra of Products</b> | <b>S17-S65</b>      |

## 1. General Information

$^1\text{H}$  NMR and  $^{13}\text{C}$  NMR spectra were recorded on a Bruker AVANCE III spectrometer 300 and 400 MHz (300 and 400 MHz for  $^1\text{H}$  NMR; 75 MHz, 100 MHz for  $^{13}\text{C}$  NMR and 162 MHz for  $^{31}\text{P}$  NMR with TMS as internal reference, and chemical shift ( $\delta$ ) and coupling constant ( $J$ ) were expressed in ppm and Hz, respectively. HRMS analysis was obtained on Xevo G2S Q-TOF spectrometer with ESI ionization method. TLC was performed on using Merck pre-coated TLC plates (Merck 60 F<sub>254</sub>) and detected under UV light. All the solvents are commercially available analytically pure. Column chromatography was carried out by using silica gel (100-200 mesh). Reagents and solvents were purified as per standard procedures.

**Details of light source:** Manufacturer: Kessil; Model: PR160L; Wavelength: 390 nm, Distance: 6 cm.

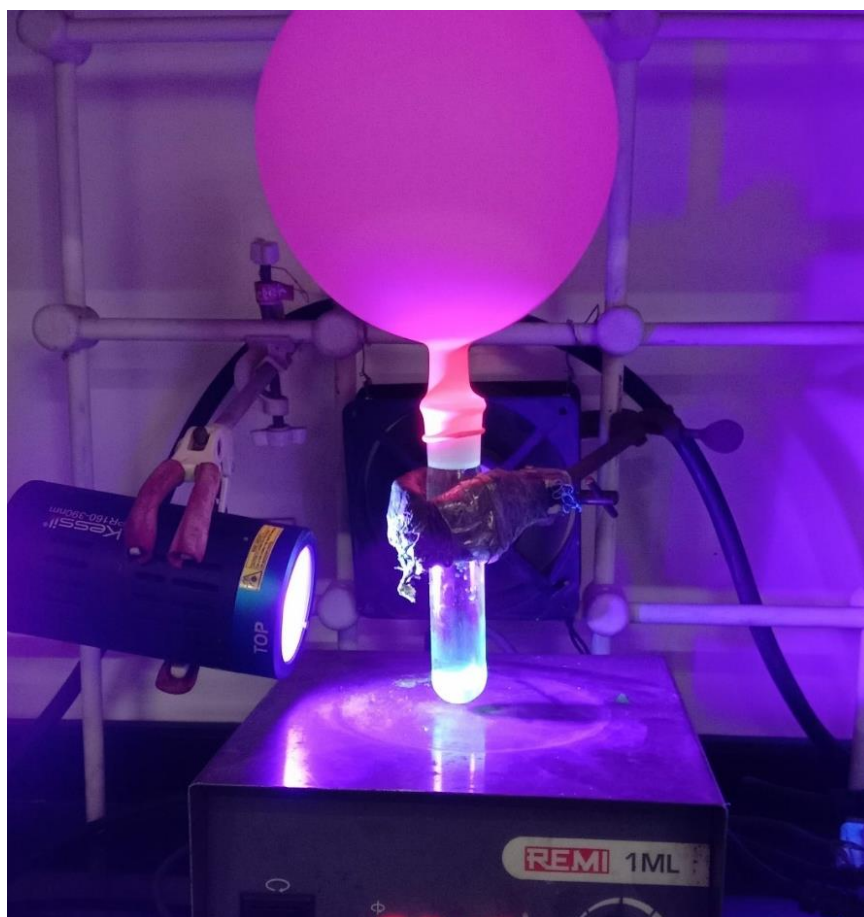

**Figure S1** Reaction setup with kessil PR160L- Purple LED 390 nm

## 2. General Procedures

### 2.1. General procedure A for synthesis of $\beta$ -Ketophosphonates:<sup>1</sup>

To a solution of LiHMDS (9.80 g, 42 mmol) in THF (1.0 M) cooled in an ice bath and dimethyl methyl phosphonate (2.72 g, 22 mmol) was added. To this mixture was added the aryl ester (2.72 g, 20 mmol) (either neat or dissolved in a minimal amount of THF) drop-wise, maintaining the internal temperature of the reaction below 5 °C. The reaction was stirred at 0°C until complete consumption of the ester as determined by TLC. The mixture was partitioned between saturated NH<sub>4</sub>Cl and EtOAc, the aqueous layer was extracted with EtOAc (20 mL x 3). The combined organic layer was washed with water (20 mL x 2), brine (20 mL x 2), dried over Na<sub>2</sub>SO<sub>4</sub> and the solvent removed in vacuo. Crude product as such used for further reaction.

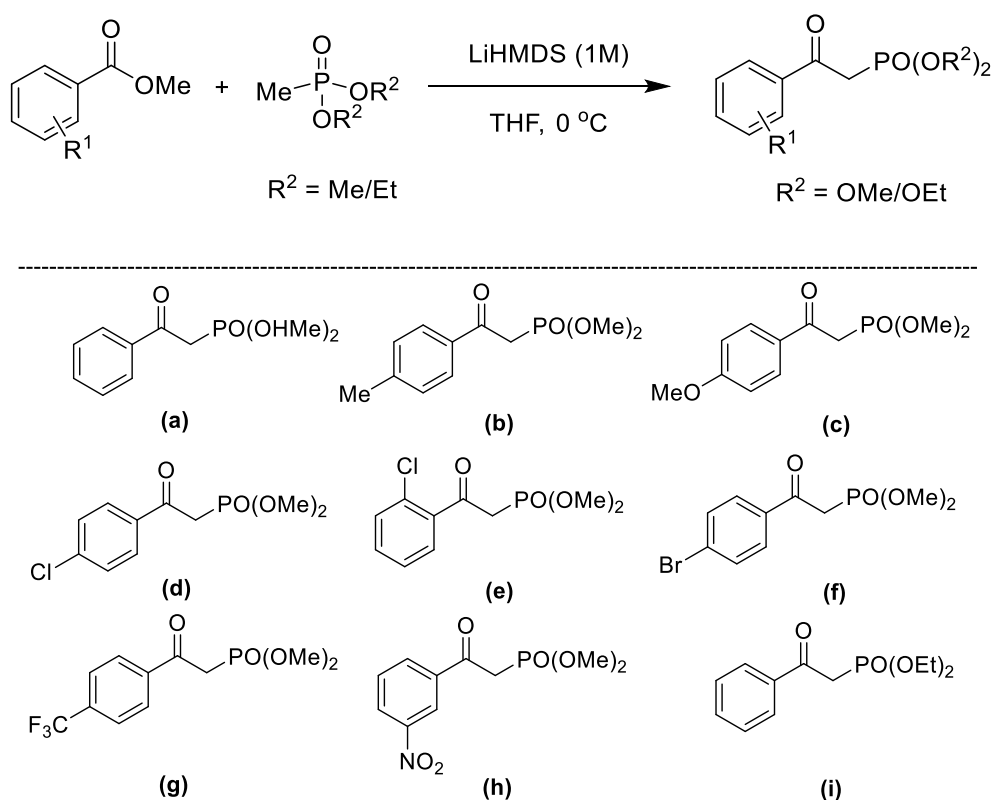

### 2.2. General procedure B for synthesis of diazo phosphonate derivatives<sup>1a, 2</sup>

To a stirred solution of phosphonate ester (2.28 g, 10 mmol) and TsN<sub>3</sub> (2.16g, 11 mmol) in acetonitrile was added K<sub>2</sub>CO<sub>3</sub> (2.07 g, 15 mmol) and the resulting mixture was stirred at room temperature for overnight. The reaction mixture was filtered through a pad of Celite and washed with EtOAc (20 mL x 3). The solvent was evaporated under reduce pressure and

the residue was purified by column chromatography using EtOAc/petroleum ether as eluent to furnish the pure diazo compound **1**.

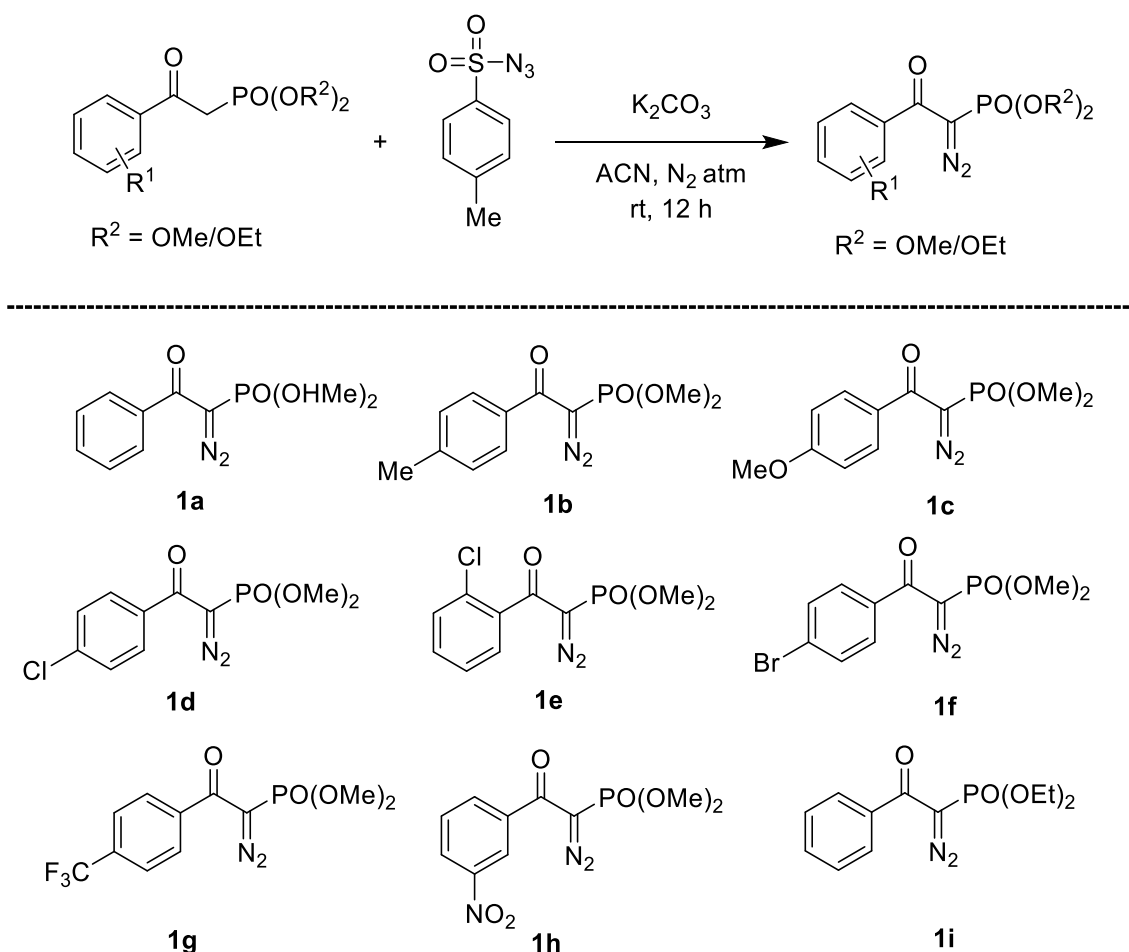

### 2.3 General procedure C for the synthesis of $\alpha$ -amido- $\beta$ -keto phosphonates

The reaction tube was charged with diazo-phosphonate (0.10 g, 0.39 mmol) and nitrile (7.86 mmol) in DCM (4 mL). The mixture was stirred under irradiation of light (390 nm) for 2 hours. After the completion of the reaction was confirmed by TLC, the solvent was evaporated under reduced pressure. The crude was purified by column chromatography using EtOAc/Hexanes as an eluent to furnish the corresponding  $\alpha$ -amido- $\beta$ -keto phosphonates.

### 3. Mechanistic Studies:

#### 3.1 Reaction without nitrile

The reaction tube was charged with diazo-phosphonate **1a** (0.39 mmol) in DCM (4 mL) was allowed to stir under purple LED (390 nm) for 2 hours. The formation of the  $\beta$ -keto-phosphonate ester **1a'** was initially confirmed by TLC, after purified by column

chromatography (65% yield) was further confirmed by  $^1\text{H}$  and  $^{13}\text{C}$  NMR spectroscopy is shown below (Figure S2).

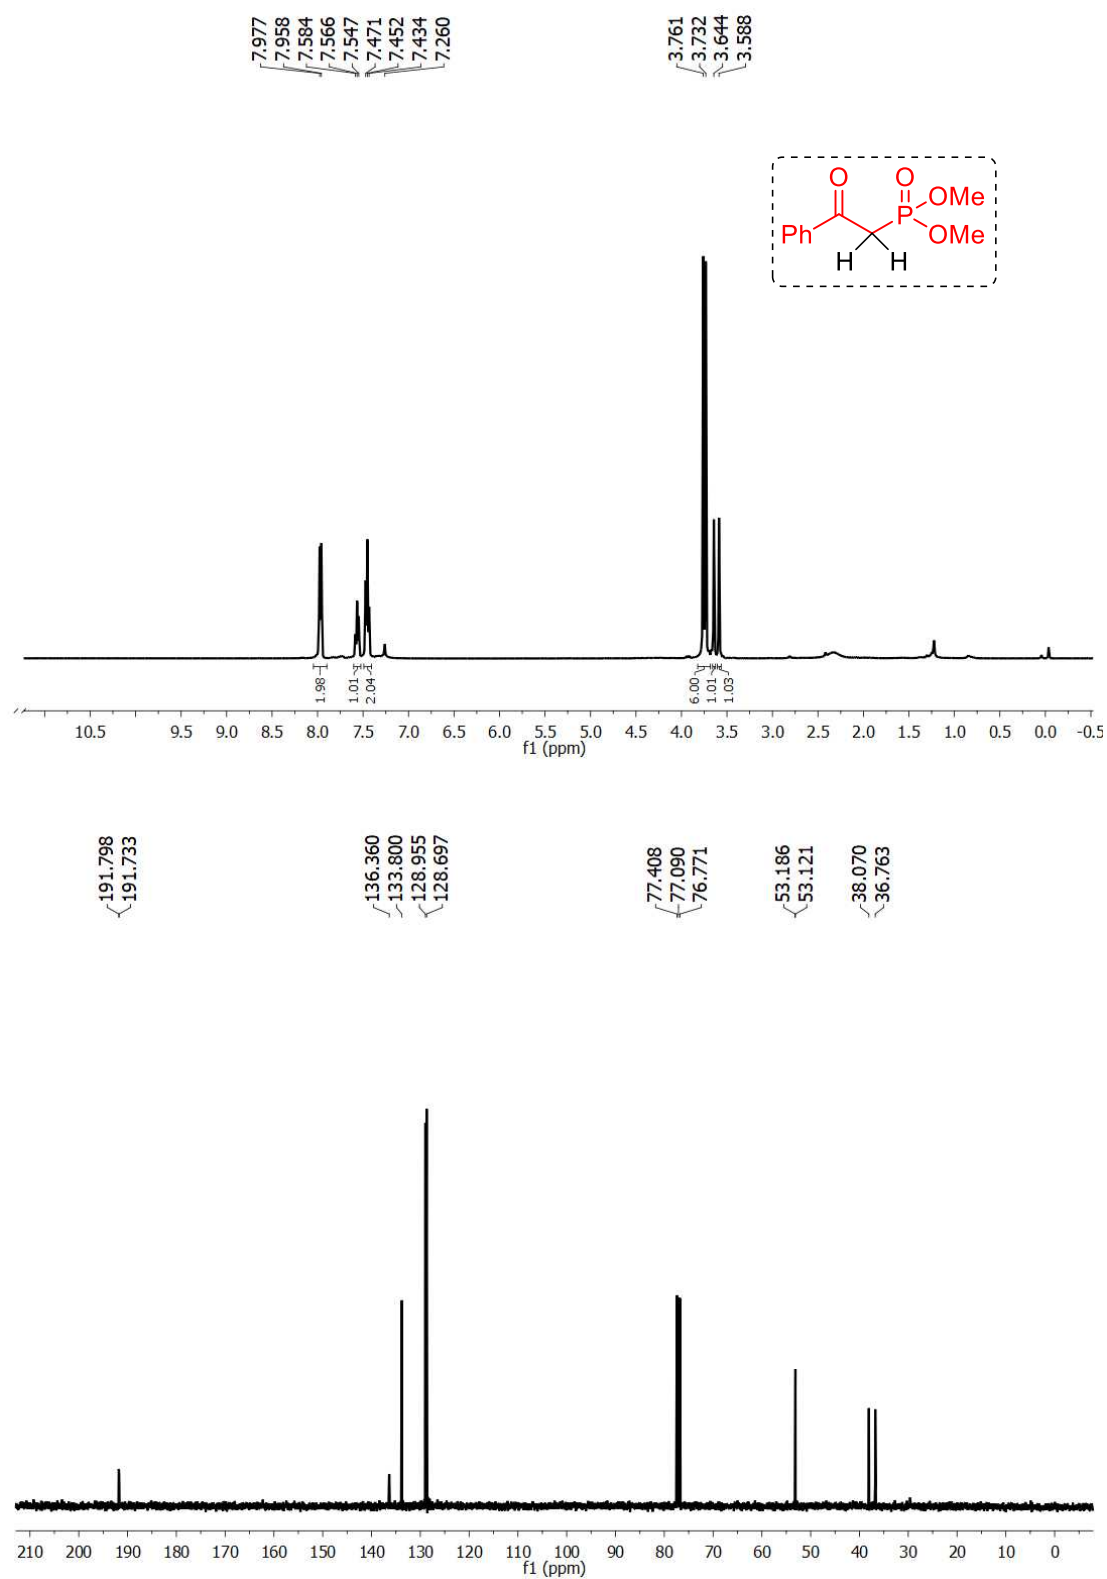

Figure S2:  $^1\text{H}$  and  $^{13}\text{C}$  NMR spectrum of compound 1a'

### 3.2 Reaction with dry DCM

The reaction tube was charged with diazo-phosphonate **1a** (0.39 mmol) in dry DCM (2 mL) purged with nitrogen was allowed to stir under purple LED (390 nm) for 2 hours under oxygen atmosphere. After two hours, the expected  $\beta$ -keto-phosphonate ester **1a'** was not formed and the starting material diazophosphonate **1a** was completely decomposed.

### 3.3 Reaction with benzamide

The reaction tube was charged with diazophosphonate **1a** (0.39 mmol) and benzamide **2a'** (0.81 mmol) in DCM (4 mL) was added and allowed to stir under purple LED (390 nm) for 2 hours. After two hours the expected product **3a** was not formed and the starting material **2a'** was recovered completely.

### 3.4 Analysis of reaction mixture

The reaction tube was charged with diazophosphonate **1a** (0.39 mmol) and benzonitrile **2a** (7.86 mmol) in DCM (4 mL). The mixture was stirred under irradiation of light (390 nm) for half an hour. Then the reaction mixture was analysed with HRMS immediately, for the detection of intermediates formed during reaction (Scheme S3-S5).

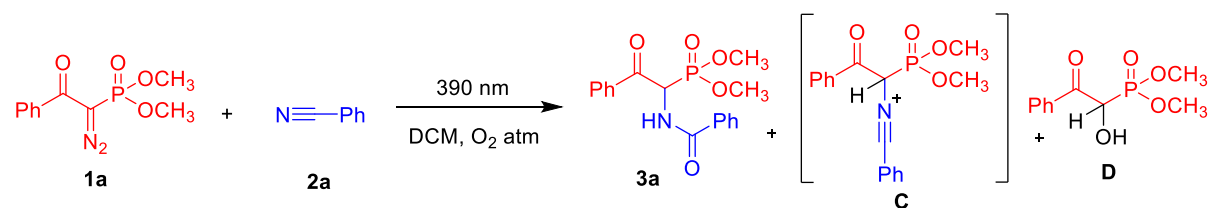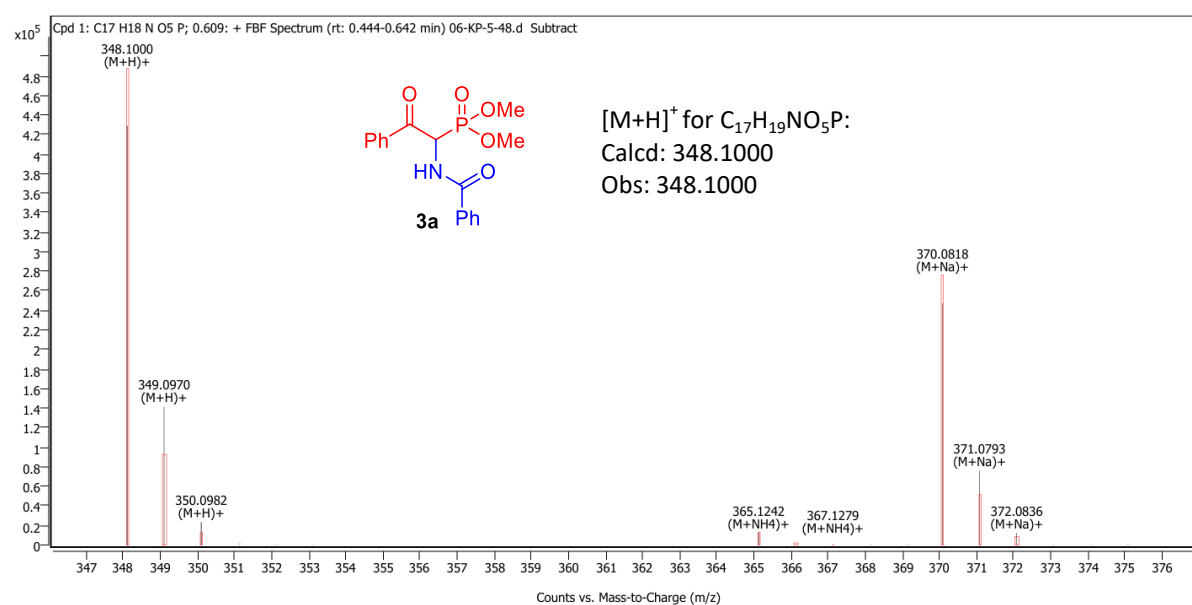

**Figure S3: HRMS spectrum of intermediate 3a:** Calcd. [M+H]<sup>+</sup> for C<sub>17</sub>H<sub>19</sub>NO<sub>5</sub>P: 348.1000; Obs: 348.1000.

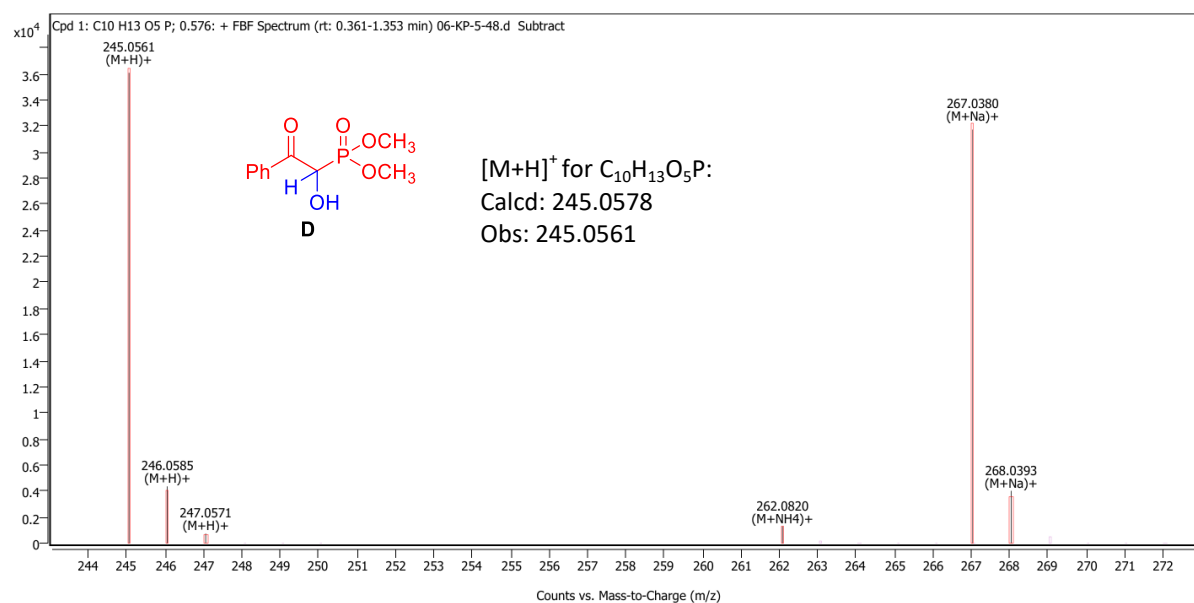

**Figure S4: HRMS spectrum of intermediate D:** Calcd.  $[M+H]^+$  for C<sub>10</sub>H<sub>13</sub>O<sub>5</sub>P: 245.0578; Obs: 245.0561

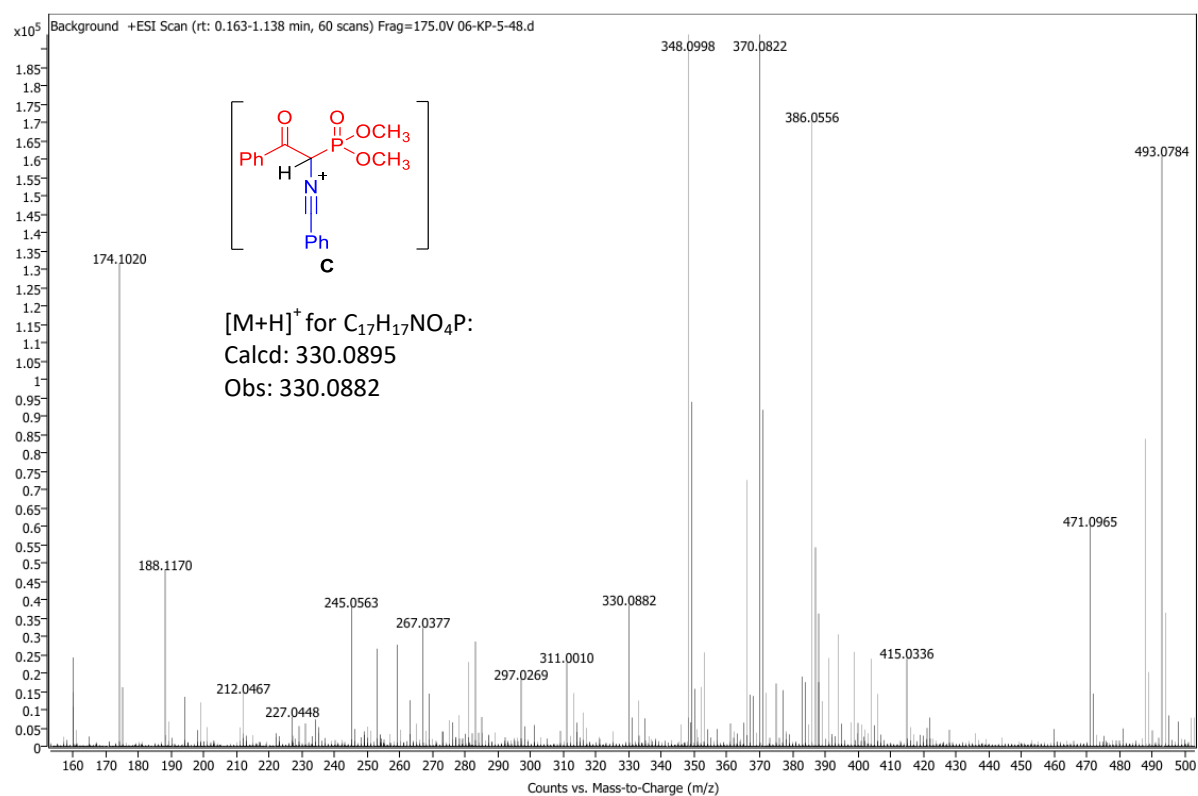

**Figure S5: HRMS spectrum of intermediate C:** Calcd.  $[M+H]^+$  for C<sub>17</sub>H<sub>17</sub>NO<sub>4</sub>P: 330.0895; Obs: 330.0882.

#### 4. Characterization of Products

##### Dimethyl (1-benzamido-2-oxo-2-phenylethyl)phosphonate (3a)<sup>3</sup>

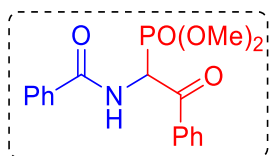

**3a** (66 mg) was synthesized following general procedure C; White solid; 70% yield (eluent: EtOAc/Hexanes = 2:3); <sup>1</sup>H NMR (300 MHz, CDCl<sub>3</sub>): δ<sub>H</sub> 8.13 (d, *J* = 7.8 Hz, 2H), 7.88 (d, *J* = 7.8 Hz, 2H), 7.64 (t, *J* = 7.2 Hz, 1H), 7.55-7.44 (m, 5H), 6.45 (dd, *J* = 8.4 Hz, 8.4 Hz, 1H), 3.78-3.72 (m, 6H); <sup>13</sup>C NMR (75 MHz, CDCl<sub>3</sub>): δ<sub>C</sub> 192.5, 166.6, 134.9, 134.3, 133.4, 132.0, 129.5, 129.4, 128.7, 127.3, 54.3 (t, *J* = 36 Hz), 53.9 (d, *J* = 6.0 Hz), 52.6.

##### Dimethyl (1-(4-methylbenzamido)-2-oxo-2-phenylethyl)phosphonate (3b)<sup>4</sup>

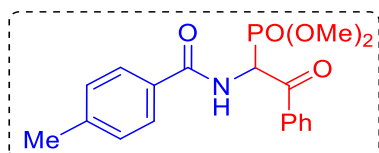

**3b** (71 mg) was synthesized following general procedure C; White solid; 72% yield (eluent: EtOAc/Hexanes = 2:3); <sup>1</sup>H NMR (300 MHz, CDCl<sub>3</sub>): δ<sub>H</sub> 8.13 (d, *J* = 7.8 Hz, 2H), 7.78 (d, *J* = 8.1 Hz, 2H), 7.66-7.61 (m, 1H), 7.54-7.45 (m, 3H), 7.27 (d, *J* = 5.1 Hz, 2H), 6.46 (dd, *J* = 8.4 Hz, *J* = 8.4 Hz, 1H), 3.77-3.72 (m, 6H), 2.41 (s, 3H); <sup>13</sup>C NMR (75 MHz, CDCl<sub>3</sub>): δ<sub>C</sub> 192.5, 166.5 (d, *J* = 3.7 Hz), 142.7, 134.8, 134.5, 130.4, 129.4 (t, *J* = 6.0 Hz), 128.8, 127.5, 127.4, 54.2 (d, *J* = 14.2 Hz), 54.0 (d, *J* = 7.5 Hz), 52.5, 21.6; <sup>31</sup>P NMR (162 MHz, CDCl<sub>3</sub>) δ<sub>P</sub> 18.38.

##### Dimethyl (1-(4-methoxybenzamido)-2-oxo-2-phenylethyl)phosphonate (3c)

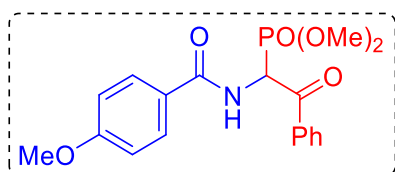

**3c** (77 mg) was synthesized following general procedure C; White solid; 75% yield (eluent: EtOAc/Hexanes = 2:3); <sup>1</sup>H NMR (300 MHz, CDCl<sub>3</sub>): δ<sub>H</sub> 8.12 (d, *J* = 7.2 Hz, 2H), 7.83 (d, *J* = 8.7 Hz, 2H), 7.65-7.60 (m, 1H), 7.54-7.49 (m, 1H), 6.95 (d, *J* = 8.7 Hz, 2H), 7.25 (s, 2H), 6.43 (dd, *J* = 8.4 Hz, 8.4 Hz, 1H), 3.86 (s, 3H), 3.77-3.70 (m, 6H); <sup>13</sup>C NMR (75 MHz, CDCl<sub>3</sub>): δ<sub>C</sub> 193.4, 163.1, 135.1, 134.2, 129.4, 129.2, 128.7, 125.7, 114.0, 55.4, 54.5, 53.9 (*J*<sub>c-p</sub> = 6.7 Hz), 52.6; HRMS: [M+H]<sup>+</sup> calculated for C<sub>18</sub>H<sub>21</sub>NO<sub>6</sub>P: 378.1106, Found: 378.1103.



### Dimethyl (1-(3-methoxybenzamido)-2-oxo-2-phenylethyl)phosphonate (3d)

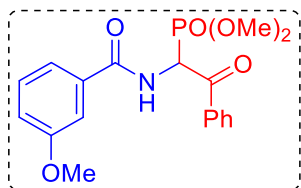

**3d** (73 mg) was synthesized following general procedure C; White solid; 71% yield (eluent: EtOAc/Hexanes = 2:3);  $^1\text{H}$  NMR (300 MHz,  $\text{CDCl}_3$ ):  $\delta_{\text{H}}$  8.13 (d,  $J = 7.8$  Hz, 2H), 7.65 (t,  $J = 7.2$  Hz, 1H); 7.54 (d,  $J = 7.5$  Hz, 1H), 7.50 (d,  $J = 4.5$  Hz, 1H), 7.46-7.40 (m, 3H), 7.36 (d,  $J = 8.4$  Hz, 1H), 7.08 (d,  $J = 7.8$  Hz, 1H), 6.45 (dd,  $J = 8.4$  Hz,  $J = 8.4$  Hz, 1H), 3.86 (s, 3H), 3.78-3.73 (m, 6H);  $^{13}\text{C}$  NMR (75 MHz,  $\text{CDCl}_3$ ):  $\delta_{\text{C}}$  192.3, 166.5, 166.4, 159.9, 134.6 (d,  $J = 3.0$  Hz), 134.5, 129.7, 129.4, 128.7, 119.1, 118.4, 112.5, 55.5, 54.1 ( $J_{\text{C-P}} = 6.7$  Hz), 52.5; HRMS:  $[\text{M}+\text{H}]^+$  calculated for  $\text{C}_{18}\text{H}_{21}\text{NO}_6\text{P}$ : 378.1106, Found: 378.1107.

### Dimethyl (1-(4-fluorobenzamido)-2-oxo-2-phenylethyl)phosphonate (3e)

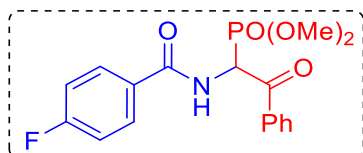

**3e** (52 mg) was synthesized following general procedure C; White solid; 52% yield (eluent: EtOAc/Hexanes = 2:3);  $^1\text{H}$  NMR (300 MHz,  $\text{CDCl}_3$ ):  $\delta_{\text{H}}$  8.12 (d,  $J = 7.8$  Hz, 2H), 7.92-7.88 (m, 2H), 7.68-7.63 (m, 1H), 7.55-7.50 (m, 2H), 7.44 (d,  $J = 8.4$  Hz, 1H), 7.17-7.12 (m, 2H), 6.43 (dd,  $J = 8.7$  Hz,  $J = 8.1$  Hz, 1H), 3.77-3.71 (m, 6H);  $^{13}\text{C}$  NMR (75 MHz,  $\text{CDCl}_3$ ):  $\delta_{\text{C}}$  192.3, 165.5 (d,  $J = 3.7$  Hz), 165.1 (d,  $J = 252$  Hz), 134.6, 134.5, 129.8, 129.7, 129.4, 128.7, 115.9, 115.6, 54.0 ( $J_{\text{C-P}} = 6.0$  Hz), 52.5;  $^{19}\text{F}$  NMR (303 MHz,  $\text{CDCl}_3$ )  $\delta_{\text{F}}$  -106.95.

### Dimethyl (1-(4-chlorobenzamido)-2-oxo-2-phenylethyl)phosphonate (3f)

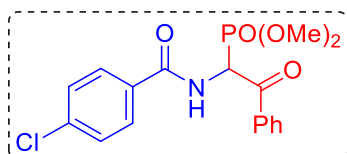

**3f** (72 mg) was synthesized following general procedure C; White solid; 69% yield (eluent: EtOAc/Hexanes = 2:3);  $^1\text{H}$  NMR (300 MHz,  $\text{CDCl}_3$ ):  $\delta_{\text{H}}$  8.13 (d,  $J = 7.5$  Hz, 2H), 7.82 (d,  $J = 8.4$  Hz, 2H), 7.68-7.63 (m, 1H), 7.56-7.51 (m, 2H), 7.45 (d,  $J = 8.4$  Hz, 2H), 7.40 (s, 1H), 6.42 (dd,  $J = 8.4$  Hz,  $J = 8.4$  Hz, 1H), 3.77-3.70 (m, 6H);  $^{13}\text{C}$  NMR (75 MHz,  $\text{CDCl}_3$ ):  $\delta_{\text{C}}$  192.4, 165.5 (d,  $J = 4.5$  Hz), 138.5, 134.6, 131.6, 129.4, 129.0, 128.8, 128.7, 54.1 ( $J_{\text{C-P}} = 6.7$  Hz), 52.5;  $^{31}\text{P}$  NMR (162 MHz,  $\text{CDCl}_3$ )  $\delta_{\text{P}}$  18.06; HRMS:  $[\text{M}+\text{H}]^+$  calculated for  $\text{C}_{17}\text{H}_{18}\text{ClNO}_5\text{P}$ : 382.0611, Found: 382.0622.

### Dimethyl (1-(4-bromobenzamido)-2-oxo-2-phenylethyl)phosphonate (3g)

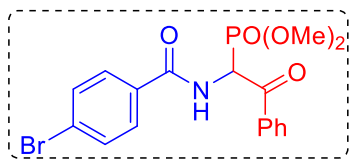

**3g** (76 mg) was synthesized following general procedure C; White solid; 65% yield (eluent: EtOAc/Hexanes = 2:3);  $^1\text{H}$  NMR (300 MHz,  $\text{CDCl}_3$ ):  $\delta_{\text{H}}$  8.12 (d,  $J = 7.5$  Hz, 2H), 7.76 (d,  $J = 8.4$  Hz, 2H), 7.68-7.60 (m, 3H), 7.53 (t,  $J = 7.8$  Hz, 2H), 7.44 (d,  $J = 7.5$  Hz, 1H), 6.42 (dd,  $J = 8.4$  Hz,  $J = 8.7$  Hz, 1H), 3.77-3.71 (m, 6H);  $^{13}\text{C}$  NMR (75 MHz,  $\text{CDCl}_3$ ):  $\delta_{\text{C}}$  192.2, 165.6 (d,  $J = 3.7$  Hz), 134.6, 134.5, 132.1, 132.0, 129.4, 128.9, 128.8, 127.0, 54.1 ( $J_{\text{C-P}} = 7.5$  Hz), 52.5;  $^{31}\text{P}$  NMR (162 MHz,  $\text{CDCl}_3$ )  $\delta_{\text{P}}$  18.03; HRMS:  $[\text{M}+\text{H}]^+$  calculated for  $\text{C}_{17}\text{H}_{18}\text{BrNO}_5\text{P}$ : 425.0105, Found: 425.0105.

### Dimethyl (1-(4-acetylbenzamido)-2-oxo-2-phenylethyl)phosphonate (3h)

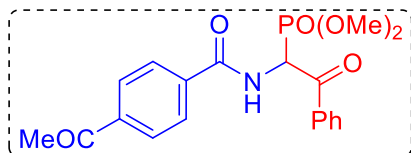

**3h** (62 mg) was synthesized following general procedure C; White solid; 58% yield (eluent: EtOAc/Hexanes = 2:3);  $^1\text{H}$  NMR (300 MHz,  $\text{CDCl}_3$ ):  $\delta_{\text{H}}$  8.13 (d,  $J = 7.2$  Hz, 2H), 8.05 (d,  $J = 8.1$  Hz, 2H), 7.98 (d,  $J = 8.1$  Hz, 2H), 7.66 (t,  $J = 7.5$  Hz, 1H), 7.59-7.51 (m, 3H), 6.44 (dd,  $J = 8.7$  Hz,  $J = 8.4$  Hz, 1H), 3.78-3.72 (m, 6H), 2.65 (s, 3H);  $^{13}\text{C}$  NMR (75 MHz,  $\text{CDCl}_3$ ):  $\delta_{\text{C}}$  197.3, 192.1, 165.7 (d,  $J = 4.5$  Hz), 139.6, 137.0, 134.6, 134.5, 129.4, 128.8, 128.6, 127.6, 54.1 ( $J_{\text{C-P}} = 6.7$  Hz), 52.6, 26.8;  $^{31}\text{P}$  NMR (162 MHz,  $\text{CDCl}_3$ )  $\delta_{\text{P}}$  18.01; HRMS:  $[\text{M}+\text{H}]^+$  calculated for  $\text{C}_{19}\text{H}_{21}\text{NO}_6\text{P}$ : 390.1106, Found: 390.1108.

### Dimethyl (1-(3-nitrobenzamido)-2-oxo-2-phenylethyl)phosphonate (3i)

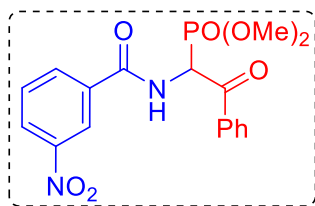

**3i** (60 mg) was synthesized following general procedure C; White solid; 56% yield (eluent: EtOAc/Hexanes = 2:3);  $^1\text{H}$  NMR (300 MHz,  $\text{CDCl}_3$ ):  $\delta_{\text{H}}$  8.74 (s, 1H), 8.41 (d,  $J = 8.1$  Hz, 1H), 8.22 (d,  $J = 7.8$  Hz, 1H), 8.14 (d,  $J = 7.2$  Hz, 2H), 7.72-7.52 (m, 5H), 6.45 (d,  $J = 8.4$  Hz,  $J = 8.4$  Hz, 1H), 3.79-3.73 (m, 6H);  $^{13}\text{C}$  NMR (75 MHz,  $\text{CDCl}_3$ ):  $\delta_{\text{C}}$  191.9, 164.2, 148.4, 134.9, 134.7, 134.4, 133.1, 129.9, 129.5, 128.8, 126.6, 122.5, 54.2 ( $J_{\text{C-P}} = 6.7$  Hz), 52.7; HRMS:  $[\text{M}+\text{H}]^+$  calculated for  $\text{C}_{17}\text{H}_{18}\text{N}_2\text{O}_7\text{P}$ : 393.0857, Found: 393.0855.

### Dimethyl (2-oxo-2-phenyl-1-(thiophene-2-carboxamido)ethyl)phosphonate (3j)

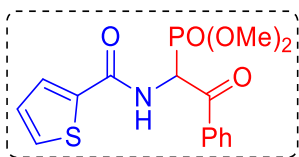

**3j** (61 mg) was synthesized following general procedure C; White solid; 63% yield (eluent: EtOAc/Hexanes = 2:3);  $^1\text{H}$  NMR (300 MHz,  $\text{CDCl}_3$ ):  $\delta_{\text{H}}$  8.11 (d,  $J = 9.0$  Hz, 2H), 7.68-7.62 (m, 2H), 7.55-7.49 (m, 3H), 7.34 (d,  $J = 8.1$  Hz, 1H), 7.13-7.09 (m, 1H), 6.40 (dd,  $J = 8.1$  Hz,  $J = 8.4$  Hz, 1H), 3.77-3.72 (m, 6H);  $^{13}\text{C}$  NMR (75 MHz,  $\text{CDCl}_3$ ):  $\delta_{\text{C}}$  192.3 (d,  $J = 0.7$  Hz), 161.08, 161.03, 137.5, 134.6, 134.5, 131.0, 129.4, 129.0, 128.7, 127.8, 54.0 ( $J_{\text{C-P}} = 6.0$  Hz), 52.3;  $^{31}\text{P}$  NMR (162 MHz,  $\text{CDCl}_3$ )  $\delta_{\text{P}}$  17.9; HRMS:  $[\text{M}+\text{H}]^+$  calculated for  $\text{C}_{15}\text{H}_{17}\text{NO}_5\text{PS}$ : 354.0565, Found: 354.0564.

### Dimethyl (1-acetamido-2-oxo-2-phenylethyl)phosphonate (3k)<sup>5</sup>

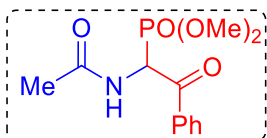

**3l** (47 mg) was synthesized following general procedure C; White solid; 61% yield (eluent: EtOAc/Hexanes = 2:3);  $^1\text{H}$  NMR (400 MHz,  $\text{CDCl}_3$ ):  $\delta_{\text{H}}$  8.07 (d,  $J = 7.2$  Hz, 2H), 7.64-7.61 (m, 1H), 7.52-7.48 (m, 2H), 6.98 (d,  $J = 8.0$  Hz, 1H), 6.26 (dd,  $J = 8.8$  Hz,  $J = 8.8$  Hz, 1H), 3.76-3.69 (m, 6H), 2.11 (s, 3H);  $^{13}\text{C}$  NMR (101 MHz,  $\text{CDCl}_3$ ):  $\delta_{\text{C}}$  192.5, 169.4 (d,  $J = 4.4$  Hz), 134.7, 134.3, 129.3, 128.7, 53.9 (d,  $J = 7.0$  Hz), 53.7 (d,  $J = 27.2$  Hz), 52.1, 22.9. HRMS:  $[\text{M}+\text{H}]^+$  calculated for  $\text{C}_{12}\text{H}_{17}\text{NO}_5\text{P}$ : 286.0844, Found: 286.0837.

### Dimethyl (1-(2-chloroacetamido)-2-oxo-2-phenylethyl)phosphonate (3l)

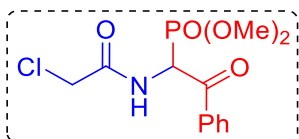

**3m** (51 mg) was synthesized following general procedure C; White solid; 58% yield (eluent: EtOAc/Hexanes = 2:3);  $^1\text{H}$  NMR (300 MHz,  $\text{CDCl}_3$ ):  $\delta_{\text{H}}$  8.08 (d,  $J = 7.2$  Hz, 2H), 7.80 (d,  $J = 7.5$  Hz, 1H), 7.65 (t,  $J = 6.6$  Hz, 1H), 7.52 (t,  $J = 7.5$  Hz, 2H), 6.17 (dd,  $J = 8.4$  Hz, 8.7 Hz, 1H), 4.15-4.07 (m, 2H), 3.75 (d,  $J = 11.1$  Hz, 6H);  $^{13}\text{C}$  NMR (75 MHz,  $\text{CDCl}_3$ ):  $\delta_{\text{C}}$  191.5, 165.7 (d,  $J = 3.7$  Hz), 134.7, 134.5, 129.5, 128.9, 54.4 (d,  $J = 6.0$  Hz), 51.2 (d,  $J = 6.7$  Hz), 52.5, 42.5;  $^{31}\text{P}$  NMR (162 MHz,  $\text{CDCl}_3$ )  $\delta_{\text{P}}$  17.27; HRMS:  $[\text{M}+\text{H}]^+$  calculated for  $\text{C}_{12}\text{H}_{16}\text{ClNO}_5\text{P}$ : 320.0454, Found: 320.0454.

### Dimethyl (1-(2-bromoacetamido)-2-oxo-2-phenylethyl)phosphonate (3m)

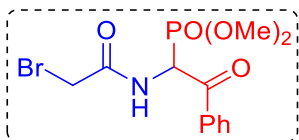

**3m** (60 mg) was synthesized following general procedure C; White solid; 60% yield (eluent: EtOAc/Hexanes = 2:3);  $^1\text{H}$  NMR (300 MHz,  $\text{CDCl}_3$ ):  $\delta_{\text{H}}$  8.07 (d,  $J = 7.5$  Hz, 2H), 7.84 (d,  $J = 7.8$  Hz, 1H), 7.64 (t,  $J = 7.2$  Hz, 1H), 7.54-7.49 (m, 2H), 6.19 (dd,  $J = 8.7$  Hz, 8.7 Hz, 1H), 3.95 (d,  $J = 2.7$  Hz, 2H), 3.86-3.71 (m, 6H);  $^{13}\text{C}$  NMR (75 MHz,  $\text{CDCl}_3$ ):  $\delta_{\text{C}}$  191.5, 165.54, 165.49, 134.6, 134.4, 129.4, 128.8, 54.3 ( $J_{\text{C-P}} = 9.0$  Hz), 52.6, 28.2; HRMS:  $[\text{M}+\text{H}]^+$  calculated for  $\text{C}_{12}\text{H}_{16}\text{BrNO}_5\text{P}$ : 363.9949, Found: 363.9947.

### Dimethyl (1-acrylamido-2-oxo-2-phenylethyl)phosphonate (3n)

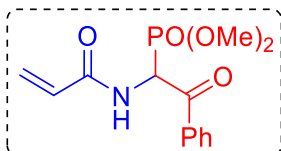

**3o** (49 mg) was synthesized following general procedure C; White solid; 61% yield (eluent: EtOAc/Hexanes = 2:3);  $^1\text{H}$  NMR (300 MHz,  $\text{CDCl}_3$ ):  $\delta_{\text{H}}$  8.07 (d,  $J = 8.1$  Hz, 2H), 7.66-7.61 (m, 1H), 7.53-7.48 (m, 2H), 7.33-7.28 (m, 1H), 6.42-6.29 (m, 2H), 5.74 (dd,  $J = 1.8$  Hz, 2.1 Hz, 1H), 3.78-3.68 (m, 6H);  $^{13}\text{C}$  NMR (75 MHz,  $\text{CDCl}_3$ ):  $\delta_{\text{C}}$  192.4, 164.8 (d,  $J = 4.5$  Hz), 134.6, 134.4, 129.7, 129.3, 128.7, 128.1, 54.1 (d,  $J = 6.7$  Hz), 53.7, 51.8; HRMS:  $[\text{M}+\text{H}]^+$  calculated for  $\text{C}_{13}\text{H}_{17}\text{NO}_5\text{P}$ : 298.0844, Found: 298.0844.

### Dimethyl (1-acetamido-2-oxo-2-(p-tolyl)ethyl)phosphonate (4a)<sup>3</sup>

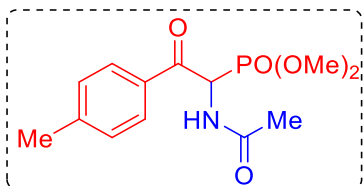

**4a** (55 mg) was synthesized following general procedure C; White solid; 71% yield (eluent: EtOAc/Hexanes = 2:3);  $^1\text{H}$  NMR (400 MHz,  $\text{CDCl}_3$ ):  $\delta_{\text{H}}$  7.90 (d,  $J = 6.8$  Hz, 2H), 7.23 (d,  $J = 6.4$  Hz, 2H), 6.76 (d,  $J = 7.2$  Hz, 1H), 6.15 (dd,  $J = 7.2$  Hz,  $J = 6.8$  Hz, 1H), 3.67-3.62 (m, 6H), 2.35 (s, 3H), 2.03 (d,  $J = 0.8$  Hz, 3H);  $^{13}\text{C}$  NMR (101 MHz,  $\text{CDCl}_3$ ):  $\delta_{\text{C}}$  191.8, 169.33, 169.29, 145.6, 132.1, 129.5, 129.4, 53.8 ( $J_{\text{C-P}} = 12.1$  Hz), 52.0, 23.0, 21.8.

### Dimethyl (1-acetamido-2-(4-methoxyphenyl)-2-oxoethyl)phosphonate (4b)<sup>3</sup>

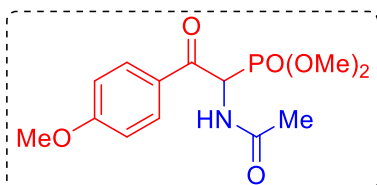

**4b** (57 mg) was synthesized following general procedure C; White solid; 74% yield (eluent: EtOAc/Hexanes = 2:3);  $^1\text{H}$  NMR (300 MHz,  $\text{CDCl}_3$ ):  $\delta_{\text{H}}$  8.06 (d,  $J = 9.0$  Hz, 2H), 7.05 (d,  $J = 8.7$  Hz, 1H), 6.97 (d,  $J = 9.0$  Hz, 2H), 6.21 (dd,  $J = 8.7$  Hz,  $J = 8.7$  Hz, 1H), 3.89 (s, 3H), 3.76-3.71 (m, 6H), 2.10 (s, 3H);  $^{13}\text{C}$  NMR (75 MHz,  $\text{CDCl}_3$ ):  $\delta_{\text{C}}$  190.5, 169.8 (d,  $J = 4.5$  Hz), 164.7, 131.9, 127.5, 114.0, 55.6, 53.9 ( $J_{\text{C-P}} = 6.7$  Hz), 51.4, 22.9;  $^{31}\text{P}$  NMR (162 MHz,  $\text{CDCl}_3$ )  $\delta_{\text{P}}$  19.01.

**Dimethyl (1-acetamido-2-(4-chlorophenyl)-2-oxoethyl)phosphonate (4c)<sup>3</sup>**

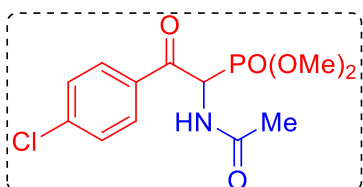

**4c** (49 mg) was synthesized following general procedure C; White solid; 62% yield (eluent: EtOAc/Hexanes = 2:3);  $^1\text{H}$  NMR (400 MHz,  $\text{CDCl}_3$ ):  $\delta_{\text{H}}$  7.93 (d,  $J = 6.8$  Hz, 2H), 7.65 (d,  $J = 6.8$  Hz, 2H), 6.97 (d,  $J = 6.4$  Hz, 1H), 6.19 (dd,  $J = 6.8$  Hz,  $J = 7.2$  Hz, 1H), 3.76-3.72 (m, 6H), 2.11 (s, 3H);  $^{13}\text{C}$  NMR (101 MHz,  $\text{CDCl}_3$ ):  $\delta_{\text{C}}$  191.7, 169.5, 169.4, 133.4, 132.0, 130.7, 129.9, 53.9 ( $J_{\text{C-P}} = 7.0$  Hz), 52.2, 22.9.

**Dimethyl (1-acetamido-2-(2-chlorophenyl)-2-oxoethyl)phosphonate (4d)**

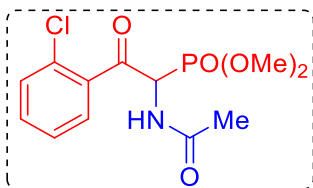

**4d** (46 mg) was synthesized following general procedure C; White solid; 60% yield (eluent: EtOAc/Hexanes = 2:3);  $^1\text{H}$  NMR (300 MHz,  $\text{CDCl}_3$ ):  $\delta_{\text{H}}$  7.70 (d,  $J = 7.8$  Hz, 1H), 7.46 (d,  $J = 3.6$  Hz, 2H), 7.42-7.35 (m, 1H), 6.93 (d,  $J = 8.4$  Hz, 1H), 6.26 (dd,  $J = 8.7$  Hz,  $J = 9.0$  Hz, 1H), 3.75-3.64 (m, 6H), 2.12 (s, 3H);  $^{13}\text{C}$  NMR (75 MHz,  $\text{CDCl}_3$ ):  $\delta_{\text{C}}$  194.2 (d,  $J = 2.2$  Hz), 169.77, 169.70, 136.3, 132.8, 132.0, 130.8, 130.2, 126.8, 54.0 ( $J_{\text{C-P}} = 6.7$  Hz), 45.3, 22.9; HRMS:  $[\text{M}+\text{H}]^+$  calculated for  $\text{C}_{12}\text{H}_{16}\text{ClNO}_5\text{P}$ : 320.0454, Found: 320.0450.

**Dimethyl (1-acetamido-2-(4-bromophenyl)-2-oxoethyl)phosphonate (4e)<sup>3</sup>**

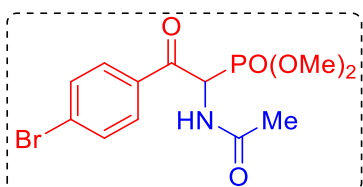

**4e** (48 mg) was synthesized following general procedure C; White solid; 63% yield (eluent: EtOAc/Hexanes = 2:3);  $^1\text{H}$  NMR (400 MHz,  $\text{CDCl}_3$ ):  $\delta_{\text{H}}$  8.03-8.00 (m, 2H), 7.47 (d,  $J = 8.4$  Hz, 2H), 6.96 (d,  $J = 8.4$  Hz, 1H), 6.19 (dd,  $J = 8.8$  Hz,  $J = 8.8$  Hz, 1H), 3.76-3.72 (m, 6H),

2.10 (d,  $J = 0.8$  Hz, 3H);  $^{13}\text{C}$  NMR (101 MHz,  $\text{CDCl}_3$ ):  $\delta_{\text{C}}$  191.4, 169.5, 169.4, 141.0, 133.0, 130.7, 129.0, 53.9 ( $J_{\text{C-P}} = 7.0$  Hz), 52.2, 22.9.

**Dimethyl (1-acetamido-2-oxo-2-(4-(trifluoromethyl)phenyl)ethyl)phosphonate (4f)<sup>3</sup>**

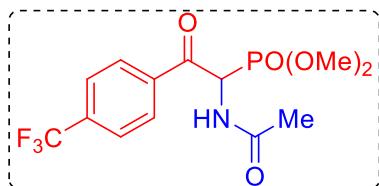

**4f** (43 mg) was synthesized following general procedure C; White solid; 57% yield (eluent: EtOAc/Hexanes = 2:3);  $^1\text{H}$  NMR (300 MHz,  $\text{CDCl}_3$ ):  $\delta_{\text{H}}$  8.18 (d,  $J = 7.8$  Hz, 2H), 7.77 (d,  $J = 8.1$  Hz, 2H), 6.94 (d,  $J = 7.8$  Hz, 1H), 6.23 (dd,  $J = 8.7$  Hz,  $J = 8.7$  Hz, 1H), 3.78-3.73 (m, 6H), 2.12 (s, 3H);  $^{13}\text{C}$  NMR (75 MHz,  $\text{CDCl}_3$ ):  $\delta_{\text{C}}$  192.0, 169.5, 137.4, 129.6, 125.79, 125.74, 54.1 ( $J_{\text{C-P}} = 9.7$  Hz), 52.3 (d,  $J = 7.0$  Hz), 22.9;  $^{19}\text{F}$  NMR (303 MHz,  $\text{CDCl}_3$ )  $\delta_{\text{F}}$  -63.31.

**Dimethyl (1-acetamido-2-(3-nitrophenyl)-2-oxoethyl)phosphonate (4g)**

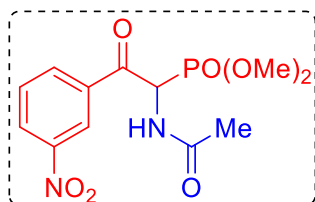

**4g** (43 mg) was synthesized following general procedure C; White solid; 56% yield (eluent: EtOAc/Hexanes = 2:3);  $^1\text{H}$  NMR (300 MHz,  $\text{CDCl}_3$ ):  $\delta_{\text{H}}$  8.90 (s, 1H), 8.49-8.41 (m, 2H), 7.73 (t,  $J = 8.1$  Hz, 1H), 6.98 (d,  $J = 8.1$  Hz, 1H), 6.24 (dd,  $J = 8.4$  Hz,  $J = 8.4$  Hz, 1H), 3.78 (d,  $J = 11.1$  Hz, 6H), 2.13 (s, 3H);  $^{13}\text{C}$  NMR (75 MHz,  $\text{CDCl}_3$ ):  $\delta_{\text{C}}$  190.9, 169.7, 169.6, 148.4, 136.0, 134.8, 129.9, 128.3, 124.1, 54.3 ( $J_{\text{C-P}} = 13.5$  Hz), 52.5, 22.8; HRMS:  $[\text{M}+\text{H}]^+$  calculated for  $\text{C}_{12}\text{H}_{16}\text{N}_2\text{O}_7\text{P}$ : 331.0695, Found: 331.0695.

**Dimethyl (1-benzamido-2-(4-chlorophenyl)-2-oxoethyl)phosphonate (4h)**

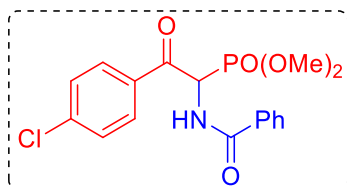

**4h** (60 mg) was synthesized following general procedure C; White solid; 65% yield (eluent: EtOAc/Hexanes = 2:3);  $^1\text{H}$  NMR (300 MHz,  $\text{CDCl}_3$ ):  $\delta_{\text{H}}$  8.08 (d,  $J = 8.4$  Hz, 2H), 7.87 (d,  $J = 7.2$  Hz, 2H), 7.53-7.45 (m, 5H), 6.40 (dd,  $J = 8.4$  Hz,  $J = 8.4$  Hz, 1H), 3.80-3.71 (m, 6H);  $^{13}\text{C}$  NMR (75 MHz,  $\text{CDCl}_3$ ):  $\delta_{\text{C}}$  191.3, 166.68, 166.63, 141.1, 133.1, 132.9, 132.2, 130.8, 129.1, 128.7, 127.3, 54.1 ( $J_{\text{C-P}} = 6.0$  Hz), 52.5; HRMS:  $[\text{M}+\text{H}]^+$  calculated for  $\text{C}_{13}\text{H}_{18}\text{NO}_5\text{P}$ : 382.0611, Found: 382.0622.

#### Diethyl (1-acetamido-2-oxo-2-phenylethyl)phosphonate (4i)

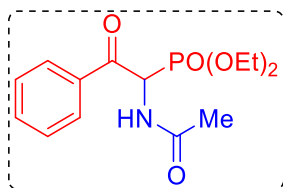

**4i** (54 mg) was synthesized following general procedure C; White solid; 68% yield (eluent: EtOAc/Hexanes = 2:3);  $^1\text{H}$  NMR (300 MHz,  $\text{CDCl}_3$ ):  $\delta_{\text{H}}$  8.06 (d,  $J = 7.5$  Hz, 2H), 7.64-7.59 (m, 1H), 7.51-7.46 (m, 2H), 7.16 (d,  $J = 8.4$  Hz, 1H), 6.26 (dd,  $J = 8.7$  Hz,  $J = 9.0$  Hz, 1H), 4.16-3.99 (m, 4H), 2.11 (s, 3H), 1.26 (t,  $J = 7.2$  Hz, 3H), 1.14 (t,  $J = 6.9$  Hz, 3H);  $^{13}\text{C}$  NMR (75 MHz,  $\text{CDCl}_3$ ):  $\delta_{\text{C}}$  192.8 (d,  $J = 1.5$  Hz), 169.57, 169.51, 135.0, 134.1, 129.2, 128.5, 63.6 ( $J_{\text{C-P}} = 4.5$  Hz), 54.2, 52.3, 22.9, 16.2 ( $J_{\text{C-P}} = 6.0$  Hz); HRMS:  $[\text{M}+\text{H}]^+$  calculated for  $\text{C}_{14}\text{H}_{21}\text{NO}_5\text{P}$ : 314.1157, Found: 314.1160.

#### Diethyl (1-benzamido-2-oxo-2-phenylethyl)phosphonate (4j)

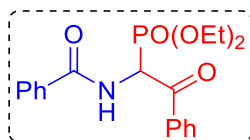

**4j** (65 mg) was synthesized following general procedure C; White solid; 70% yield (eluent: EtOAc/Hexanes = 2:3);  $^1\text{H}$  NMR (300 MHz,  $\text{CDCl}_3$ ):  $\delta_{\text{H}}$  8.13 (d,  $J = 7.8$  Hz, 2H), 7.89 (m, 2H), 7.66-7.61 (m, 1H), 7.55-7.45 (m, 5H, 5H), 6.44 (dd,  $J = 8.7$  Hz,  $J = 8.7$  Hz, 1H), 4.16-4.11 (m, 4H), 1.25 (t,  $J = 6.9$  Hz, 3H), 1.16 (t,  $J = 6.9$  Hz, 3H);  $^{13}\text{C}$  NMR (75 MHz,  $\text{CDCl}_3$ ):  $\delta_{\text{C}}$  192.7, 166.7, 166.6, 134.9, 134.3, 133.3, 132.0 (d,  $J = 13.5$ ), 129.4, 128.6 (t,  $J = 4.5$  Hz), 127.3 (d,  $J = 11.2$  Hz), 63.7 ( $J_{\text{C-P}} = 4.5$  Hz), 54.8, 52.9, 16.1 ( $J_{\text{C-P}} = 6.7$  Hz).

#### Diethyl (1-(4-methylbenzamido)-2-oxo-2-phenylethyl)phosphonate (4k)

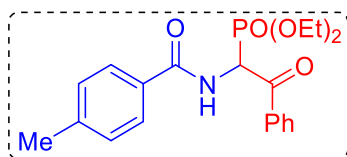

**4k** (71 mg) was synthesized following general procedure C; White solid; 74% yield (eluent: EtOAc/Hexanes = 2:3);  $^1\text{H}$  NMR (300 MHz,  $\text{CDCl}_3$ ):  $\delta_{\text{H}}$  8.12 (d,  $J = 7.8$  Hz, 2H), 7.78 (d,  $J = 7.8$  Hz, 2H), 7.62 (d,  $J = 7.2$  Hz, 1H), 7.54-7.49 (m, 2H), 7.41 (d,  $J = 8.4$  Hz, 1H), 7.28-7.25 (m, 2H), 6.44 (dd,  $J = 8.7$  Hz,  $J = 8.4$  Hz, 1H), 4.15-4.07 (m, 4H), 2.41 (s, 3H), 1.24 (t,  $J = 7.2$  Hz, 3H), 1.15 (t,  $J = 7.2$  Hz, 3H);  $^{13}\text{C}$  NMR (75 MHz,  $\text{CDCl}_3$ ):  $\delta_{\text{C}}$  192.8, 166.6, 166.5, 142.6, 135.0, 134.2, 130.5, 129.4, 129.3, 128.6, 127.3, 63.7 ( $J_{\text{C-P}} = 6.7$  Hz), 54.7, 52.9, 21.5, 16.2 ( $J_{\text{C-P}} = 6.0$  Hz); HRMS:  $[\text{M}+\text{H}]^+$  calculated for  $\text{C}_{20}\text{H}_{25}\text{NO}_5\text{P}$ : 390.1470, Found: 390.1472.

## 5. References

1. (a) R. S. Phatake, V. Mullapudi, V. C. Wakchaure and C. V. Ramana, Fluoride-Mediated Dephosphonylation of  $\alpha$ -Diazo- $\beta$ -carbonyl Phosphonates, *Org. Lett.*, 2017, **19**, 372; (b) R. R. Milburn, K. McRae, J. Chan, J. Tedrow, R. Larsen and M. Faul, A practical preparation of aryl  $\beta$ -ketophosphonates, *Tetrahedron Lett.*, 2009, **50**, 870; (c) K. M. Maloney and J. Y. L. Chung, A General Procedure for the Preparation of  $\beta$ -Ketophosphonates, *J. Org. Chem.*, 2009, **74**, 7574.
2. D. F. Taber, S. Bai and P.-f. Guo, A convenient reagent for aldehyde to alkyne homologation, *Tetrahedron Lett.*, 2008, **49**, 6904.
3. X. Tao, W. Li, X. Li, X. Xie and Z. Zhang, Diastereo- and Enantioselective Asymmetric Hydrogenation of  $\alpha$ -Amido- $\beta$ -keto Phosphonates via Dynamic Kinetic Resolution, *Org. Lett.*, 2013, **15**, 72.
4. A. G. Belyuga, V. S. Brovarets and B. S. Drach, Convenient Synthetic Approach to (2-Aryl-5-phenyl-1,3-oxazol-4-yl)phosphonic Acids and Their Functional Derivatives, *Russ. J. Gen. Chem.*, 2005, **75**, 523.
5. M. Kitamura, M. Tokunaga, T. Pham, W. D. Lubell and R. Noyori, Asymmetric synthesis of  $\alpha$ -amino  $\beta$ -hydroxy phosphonic acids via BINAP-ruthenium catalyzed hydrogenation, *Tetrahedron Lett.*, 1995, **36**, 5769.



## 6. $^1\text{H}$ , $^{13}\text{C}$ NMR and HRMS Spectra of Products

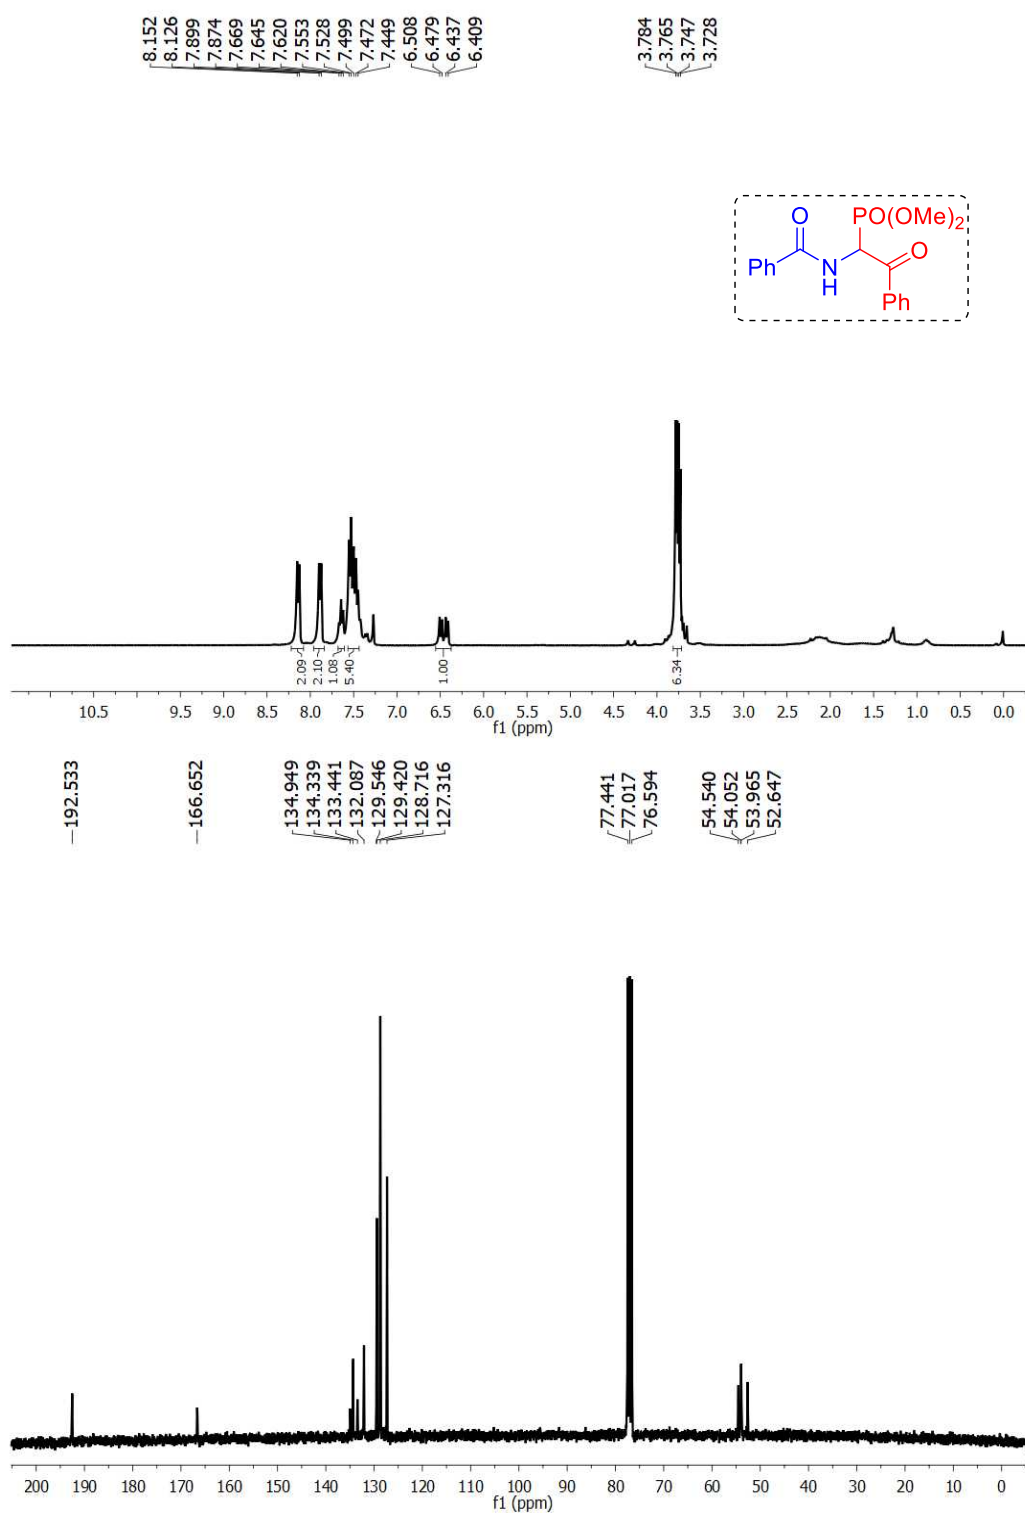

$^1\text{H}$  and  $^{13}\text{C}$  NMR spectra of compound 3a

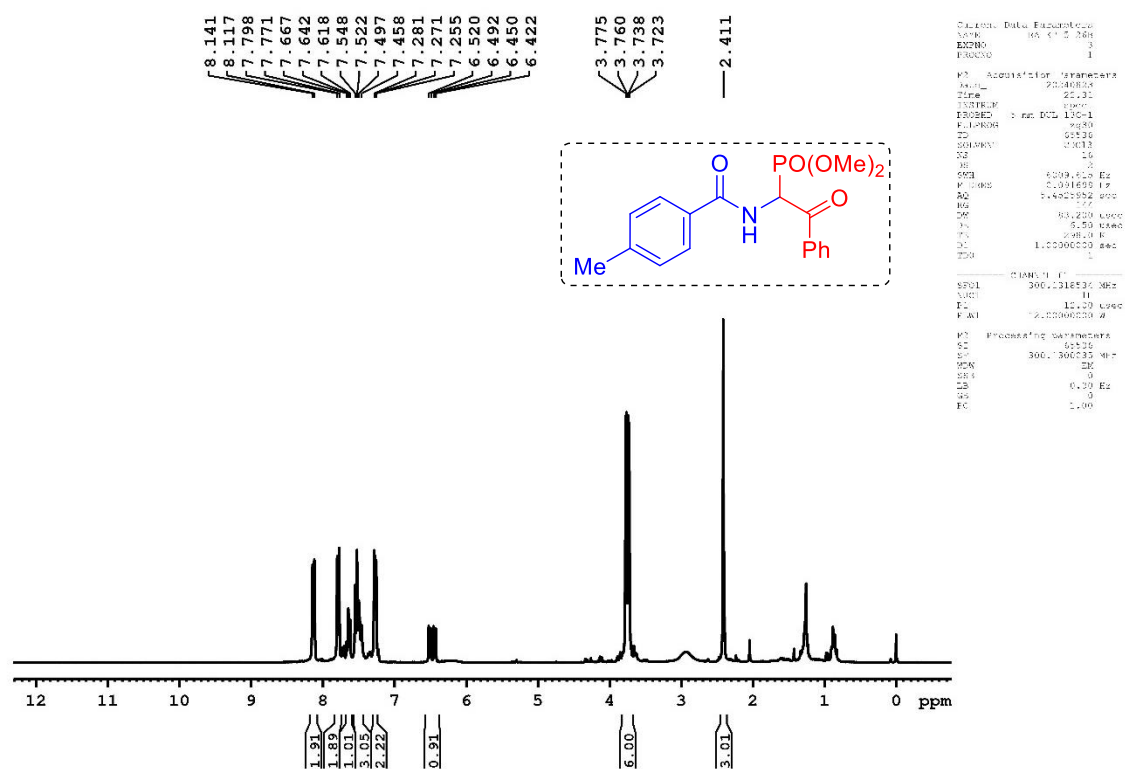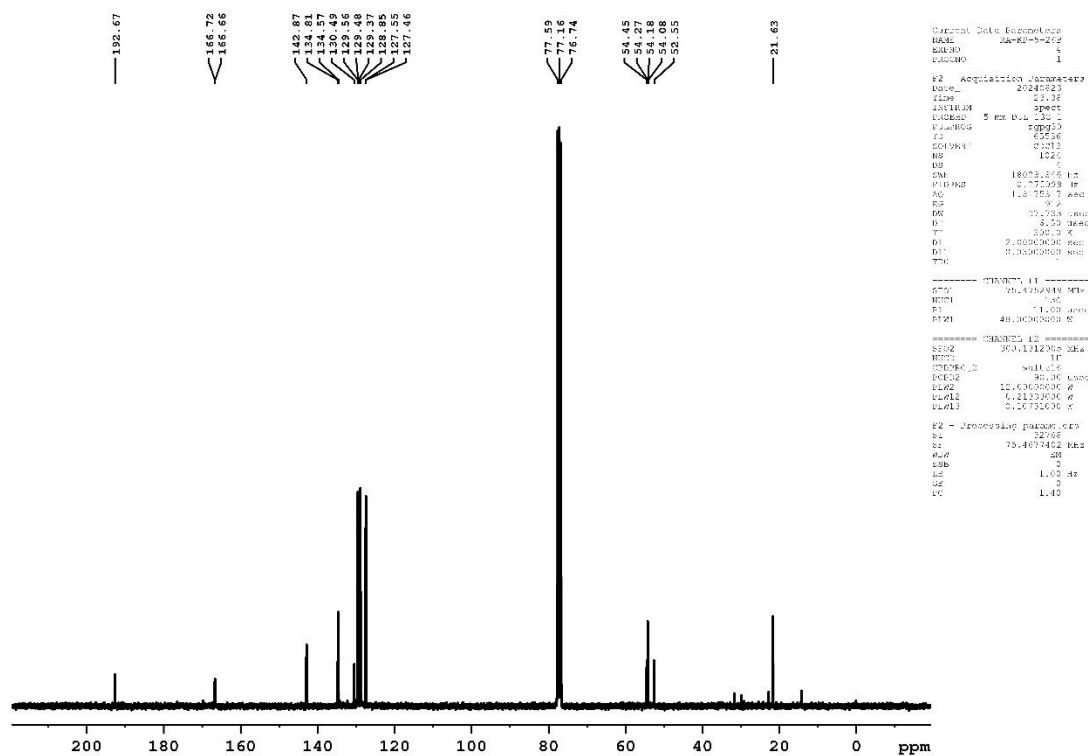

**<sup>1</sup>H and <sup>13</sup>C NMR spectra of compound 3b**

lab GSK  
rk-5-26b

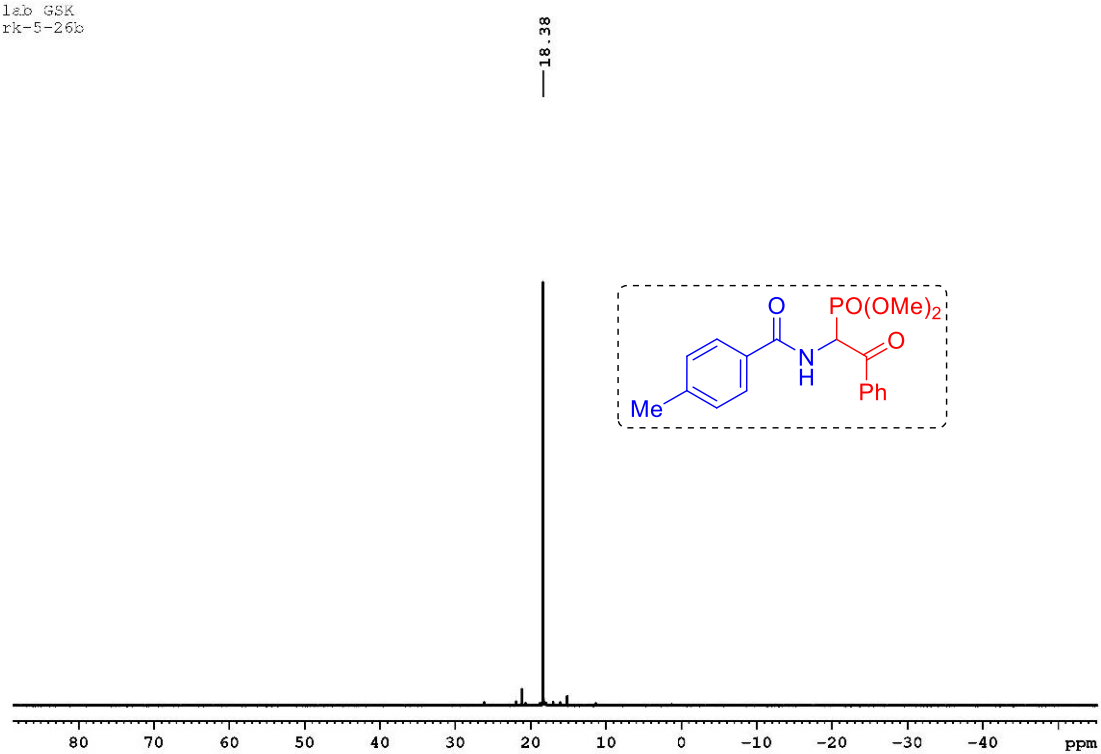

**$^{31}\text{P}$  NMR spectrum of compound 3b**

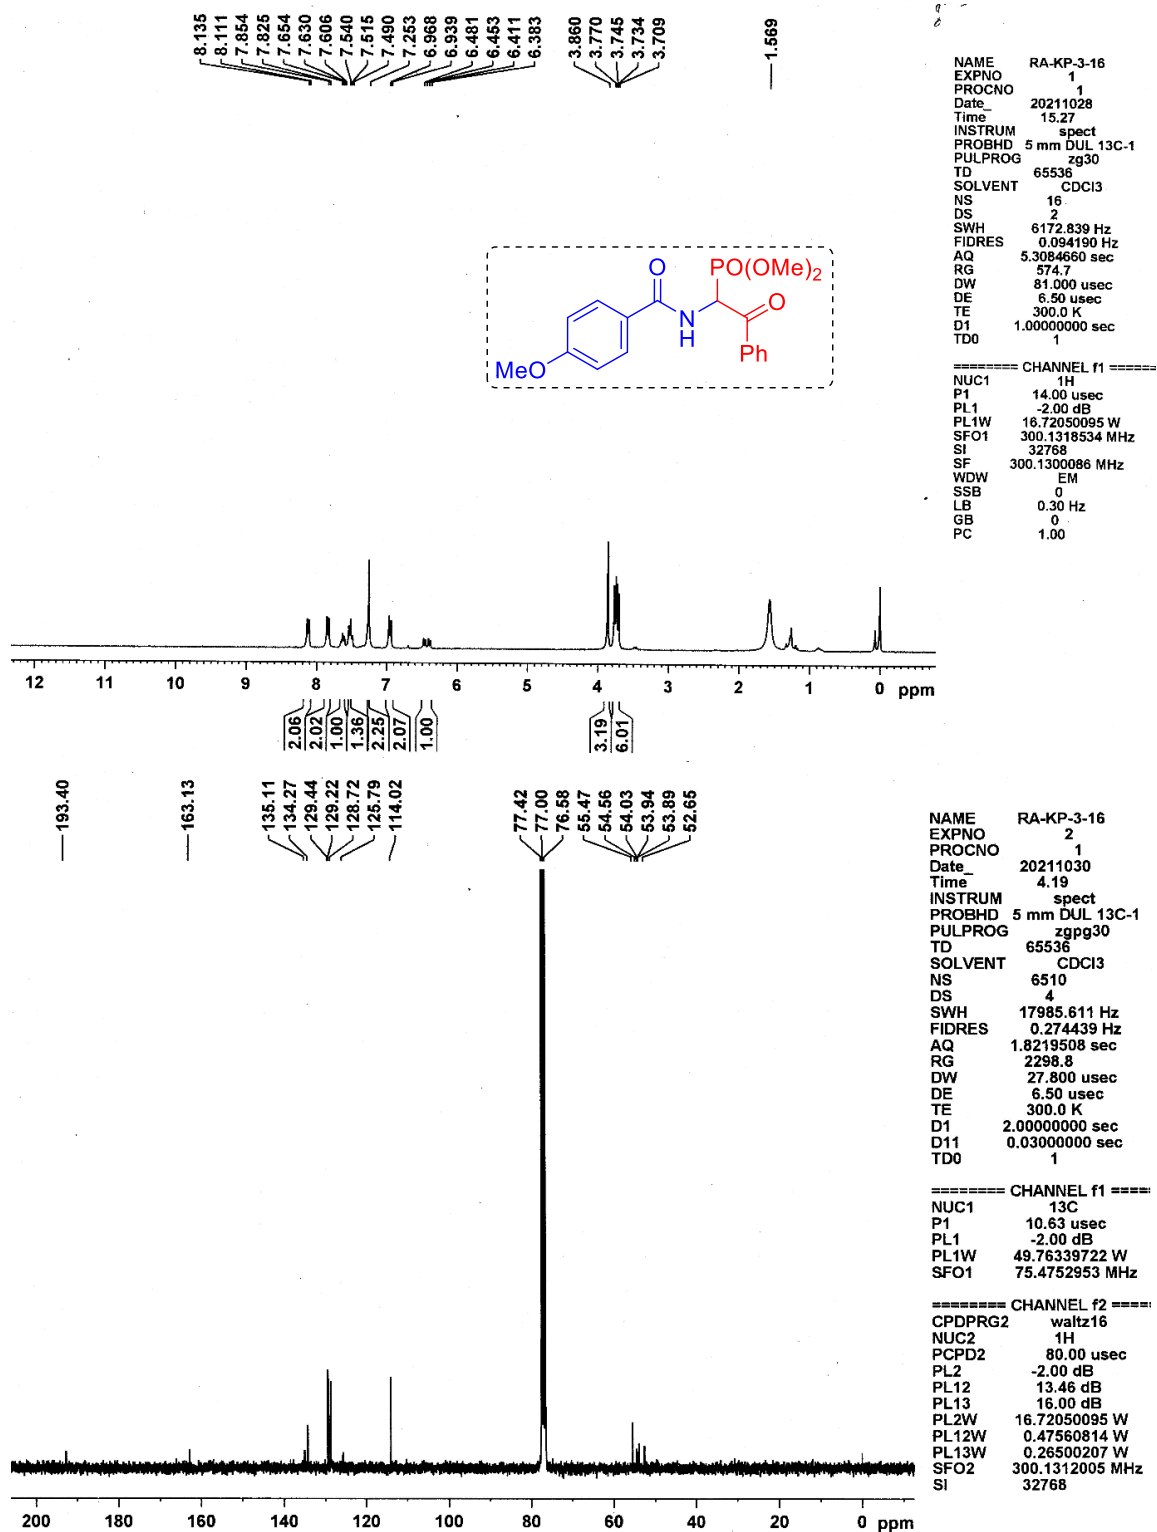

**<sup>1</sup>H and <sup>13</sup>C NMR spectra of compound 3c**

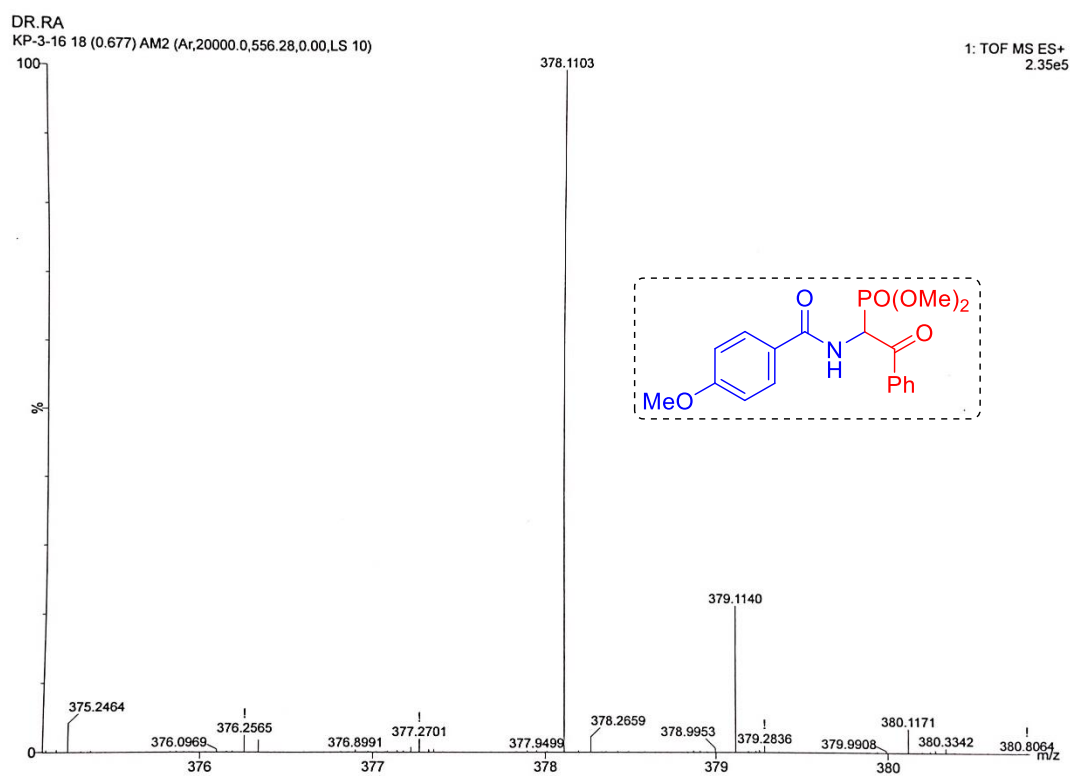

**HRMS spectrum of compound 3c**

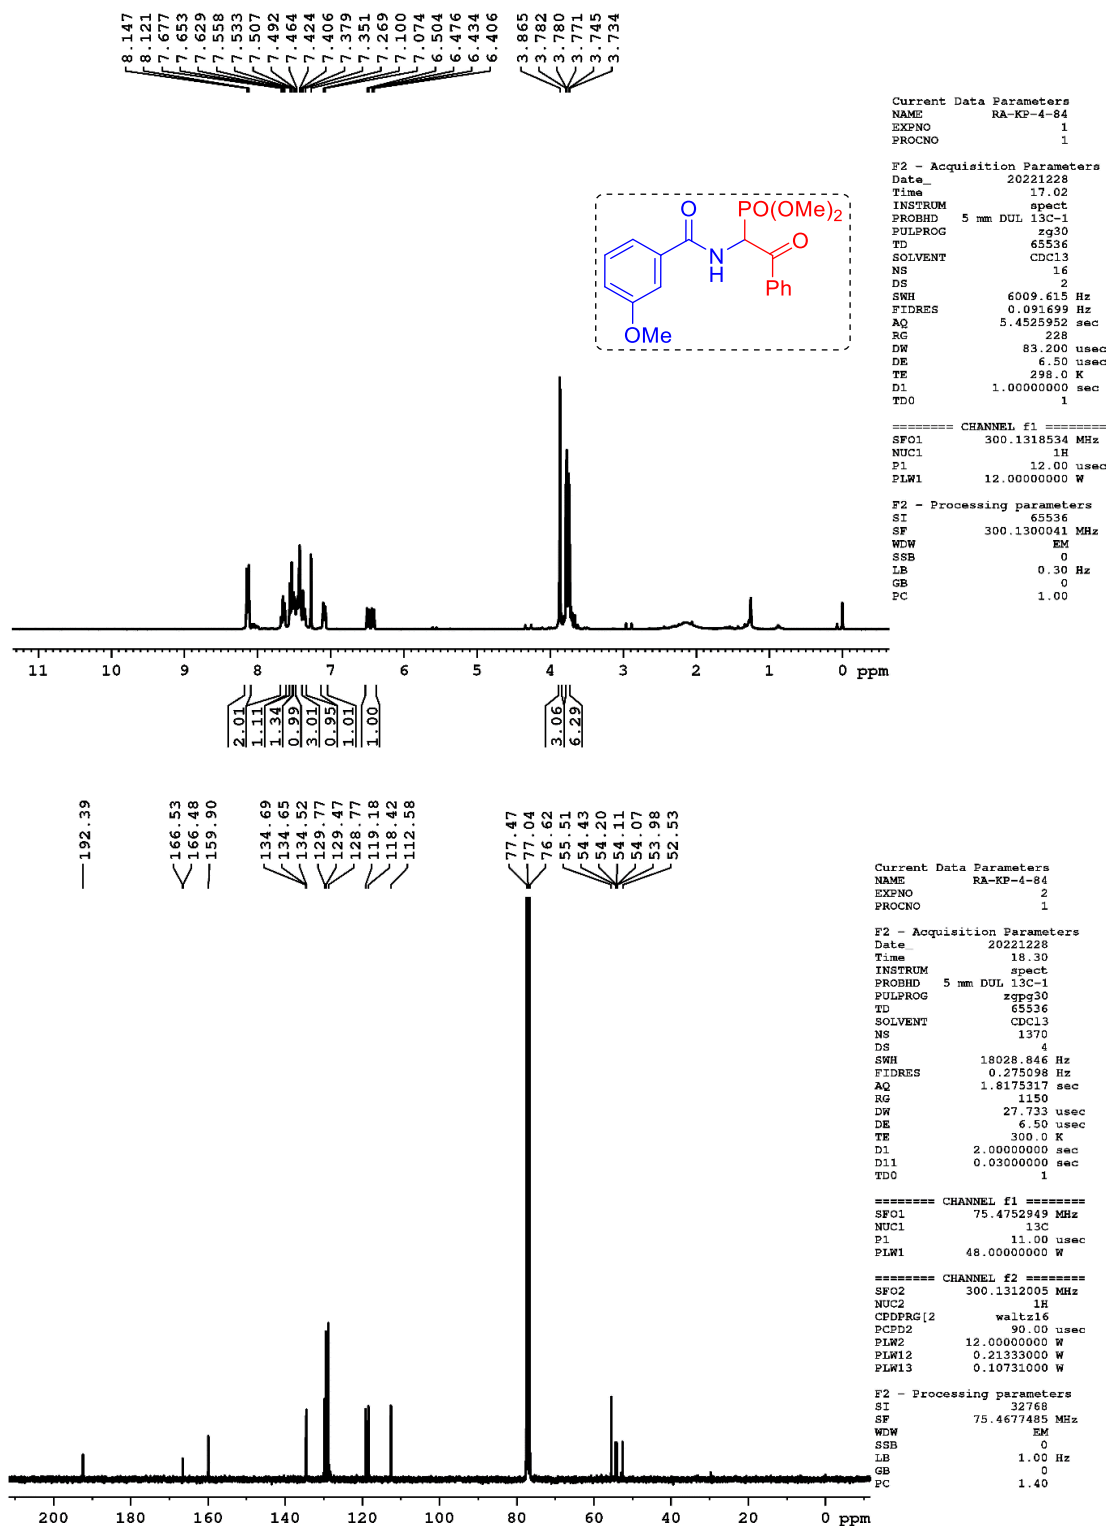

**<sup>1</sup>H and <sup>13</sup>C NMR spectra of compound 3d**

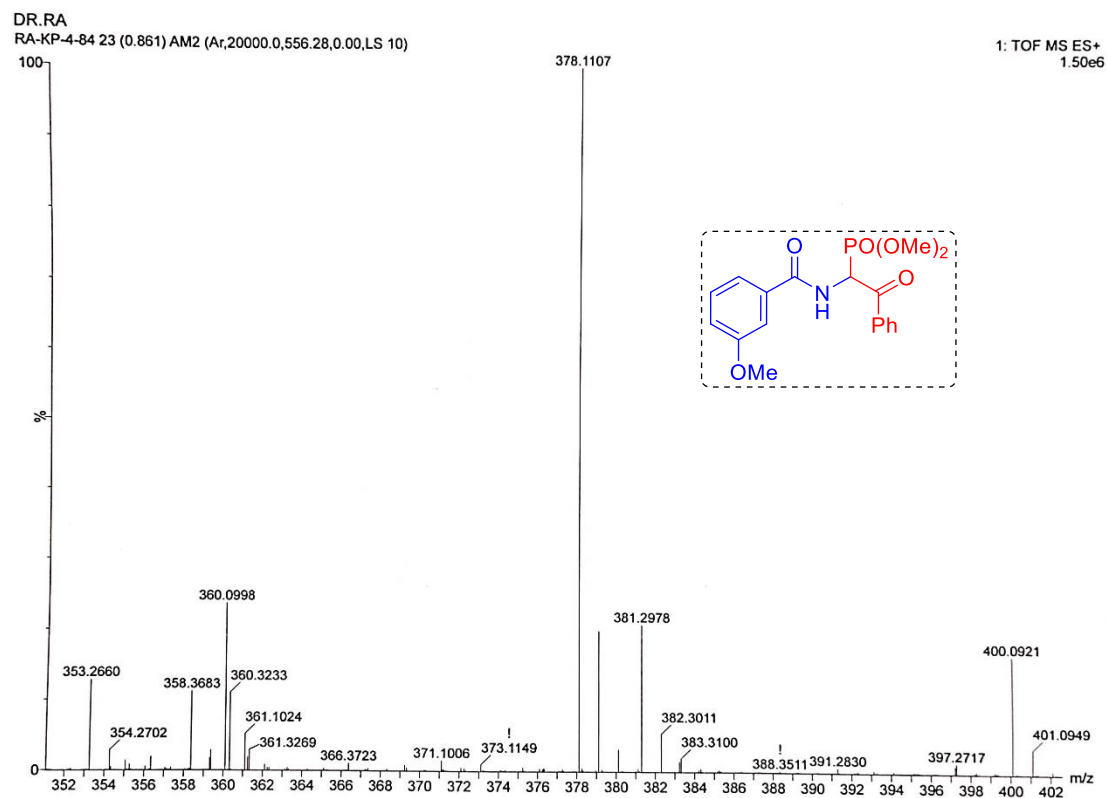

**HRMS spectrum of compound 3d**

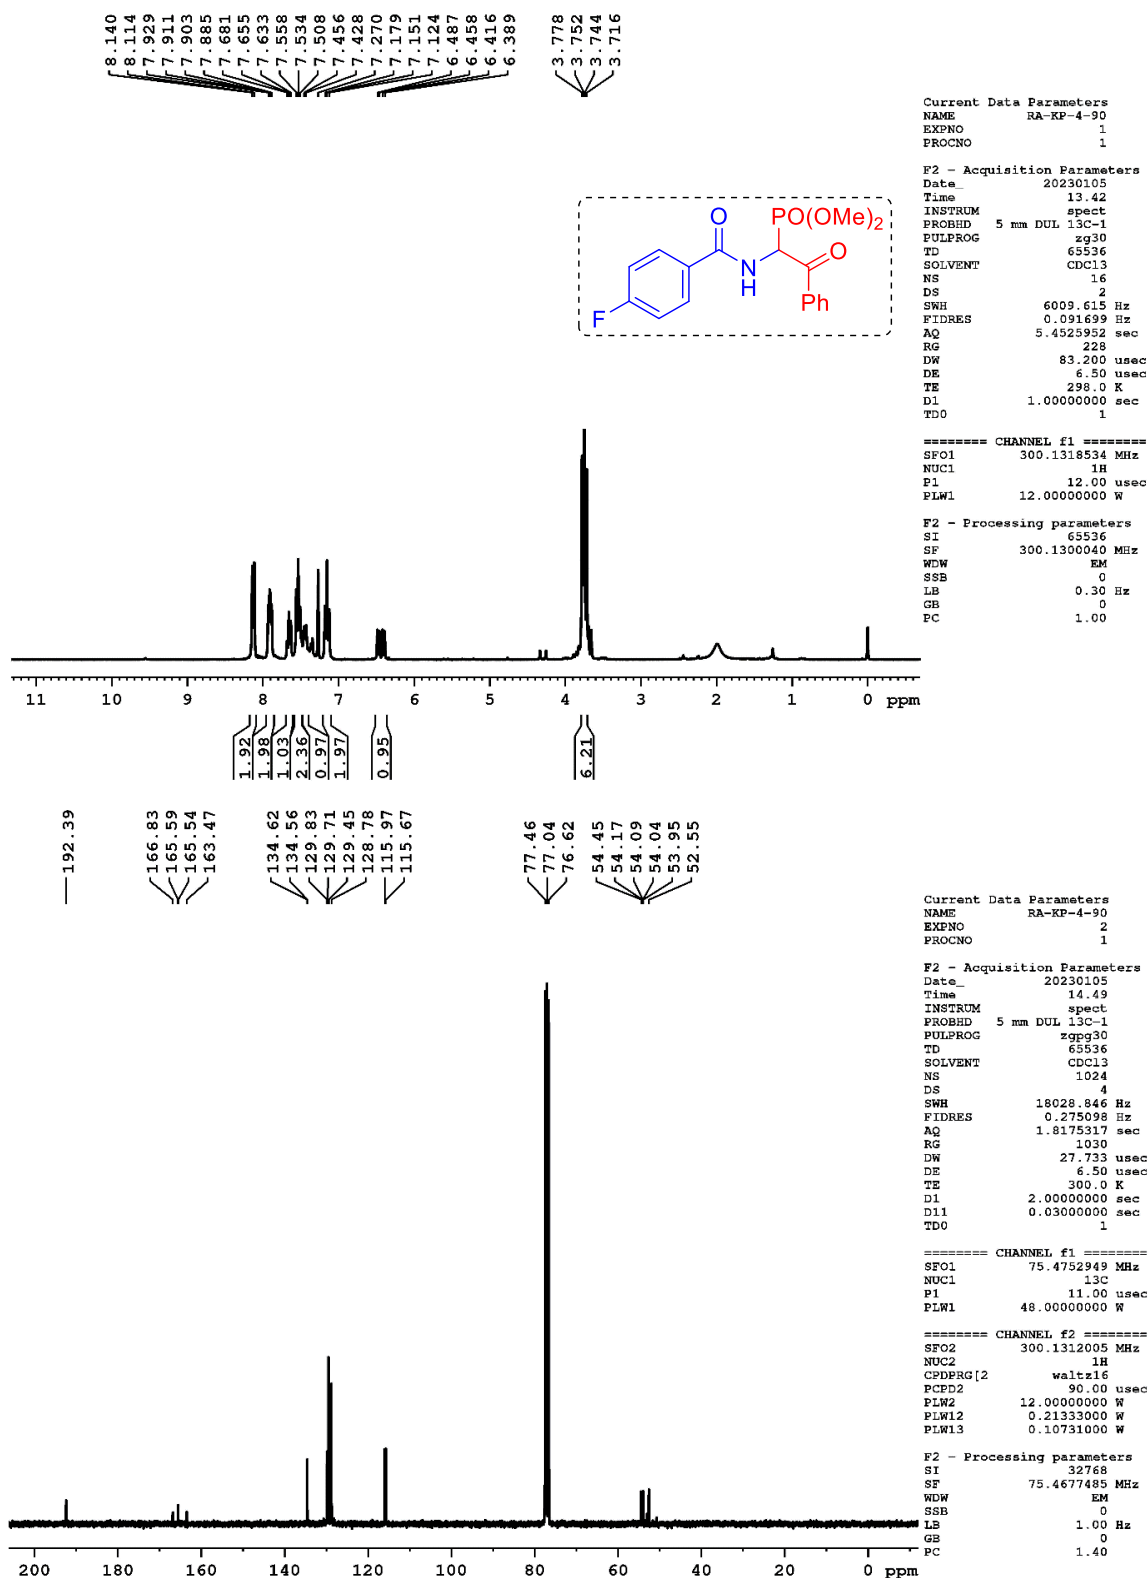

<sup>1</sup>H and <sup>13</sup>C NMR spectra of compound 3e



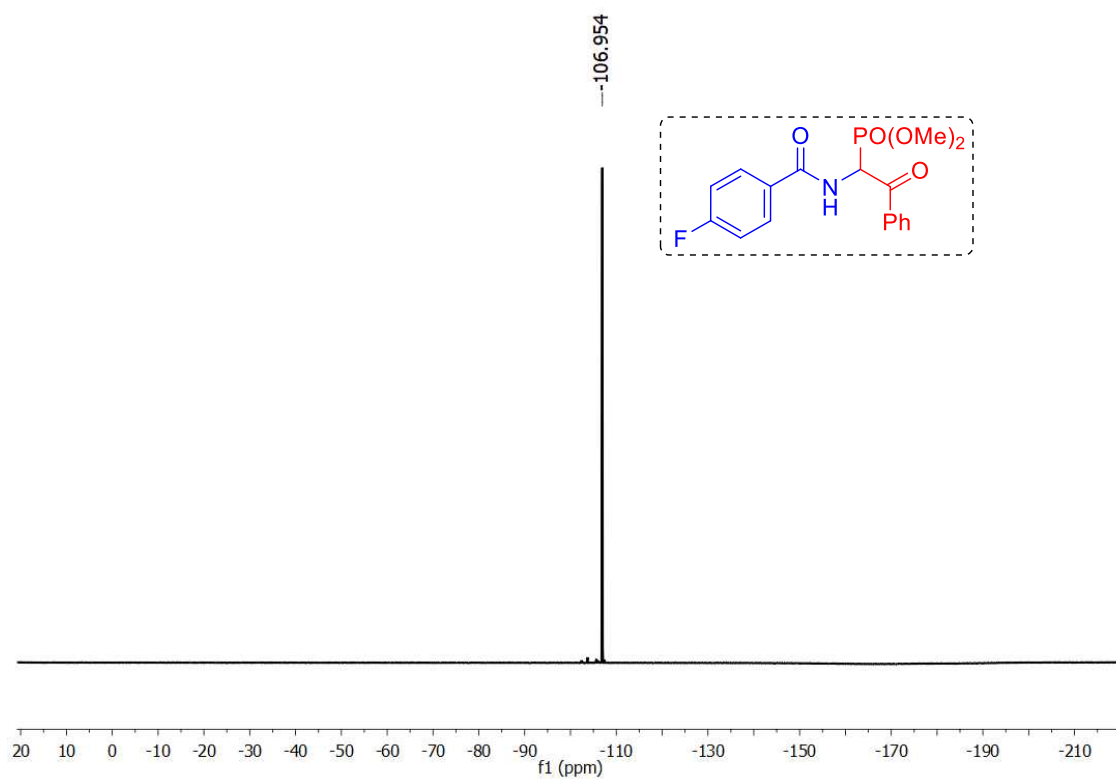

$^{19}\text{F}$  NMR spectrum of compound 3e

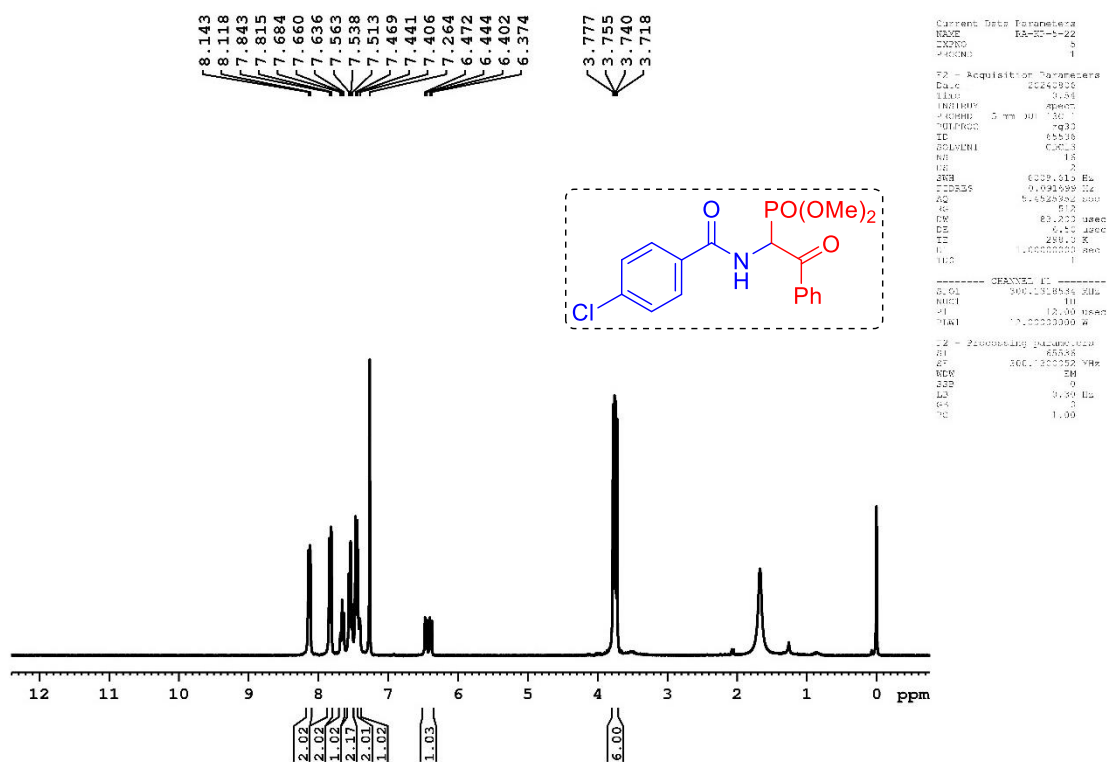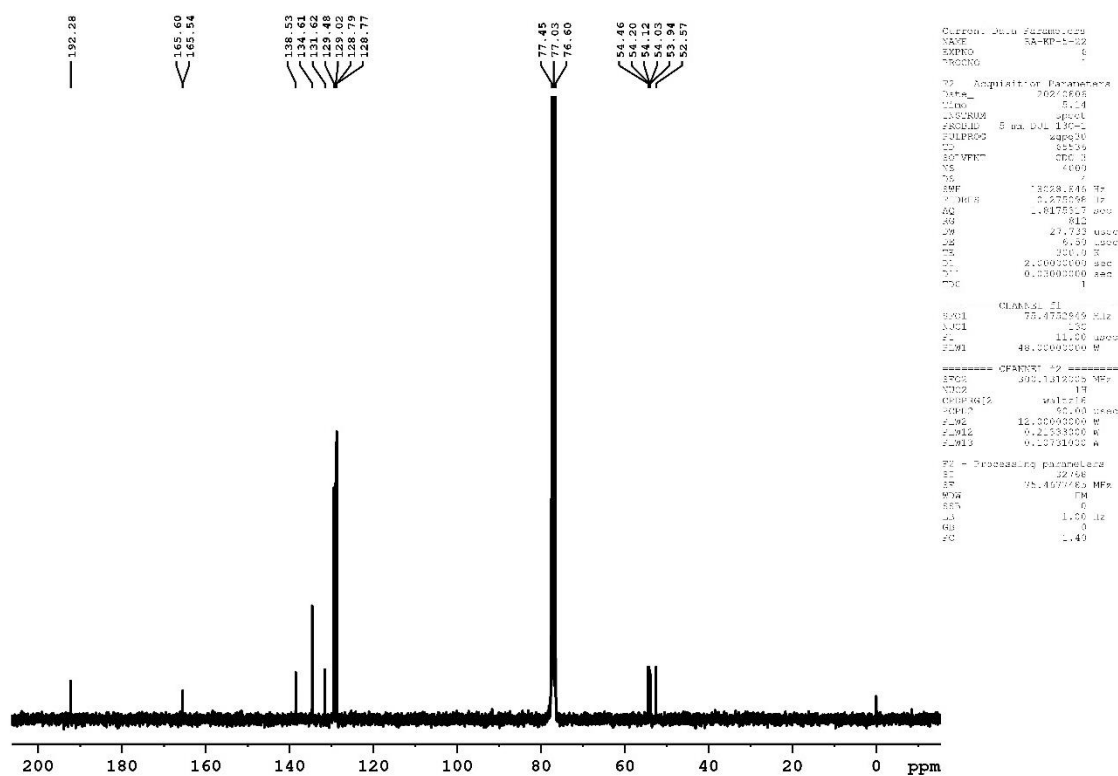

<sup>1</sup>H and <sup>13</sup>C NMR spectra of compound 3f

lab GSK  
kp-5-22

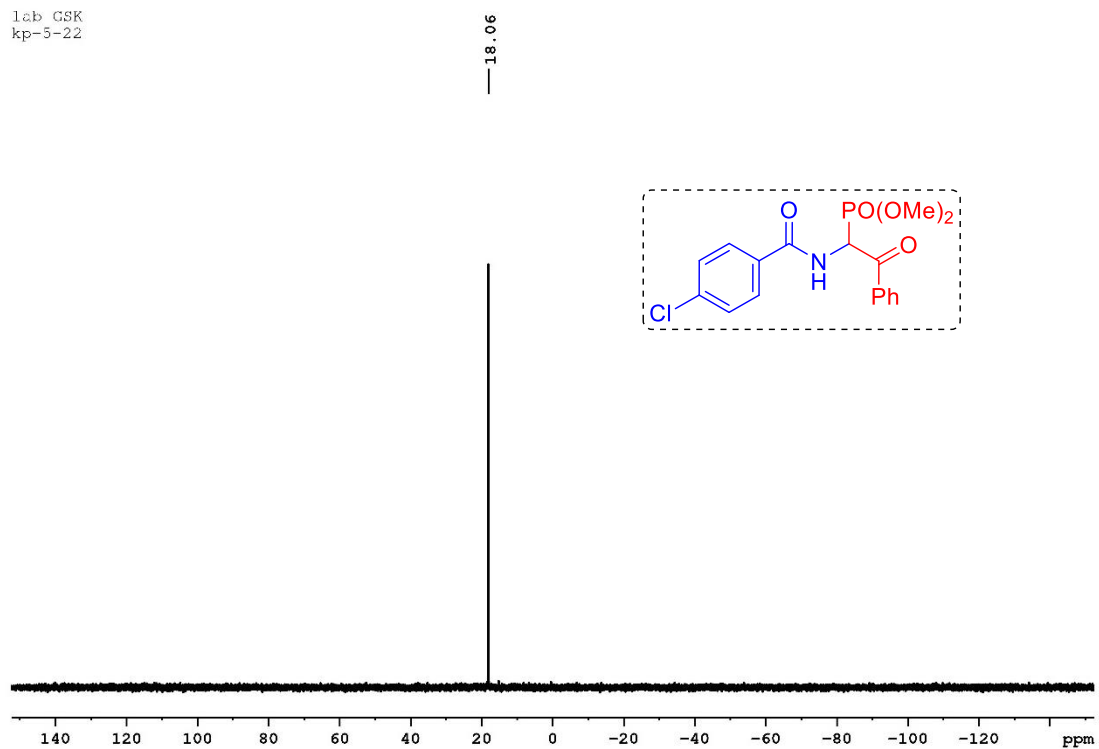

$^{31}\text{P}$  NMR spectrum of compound 3f

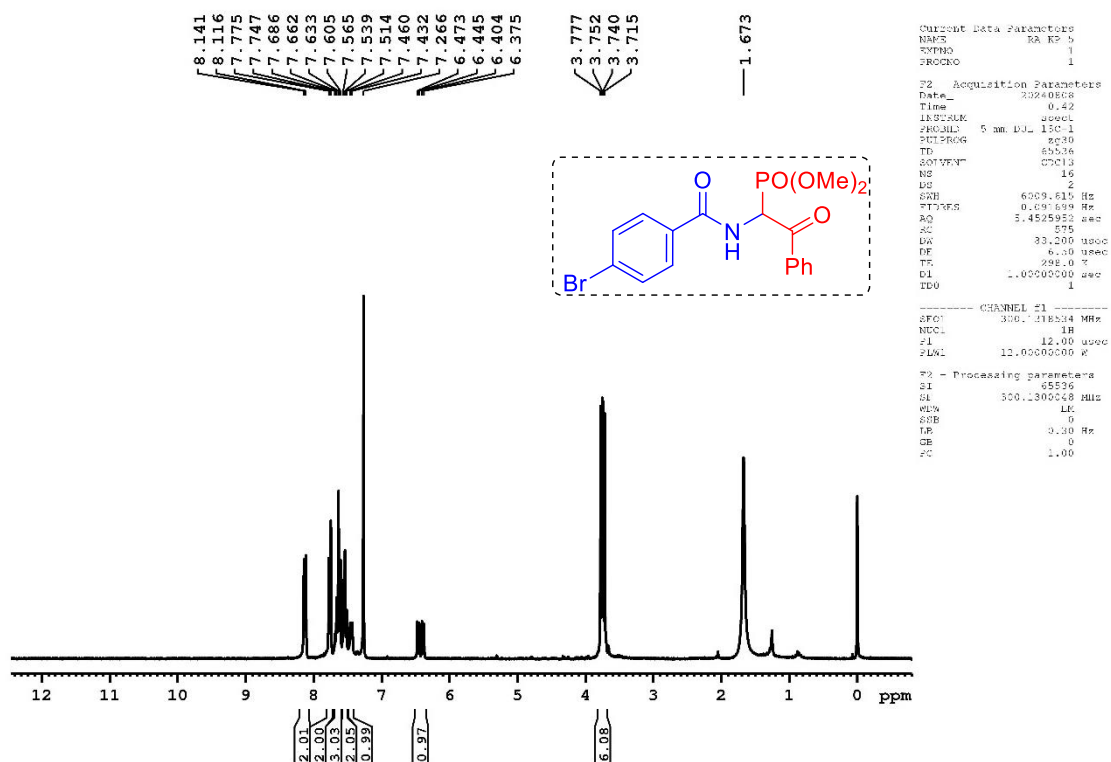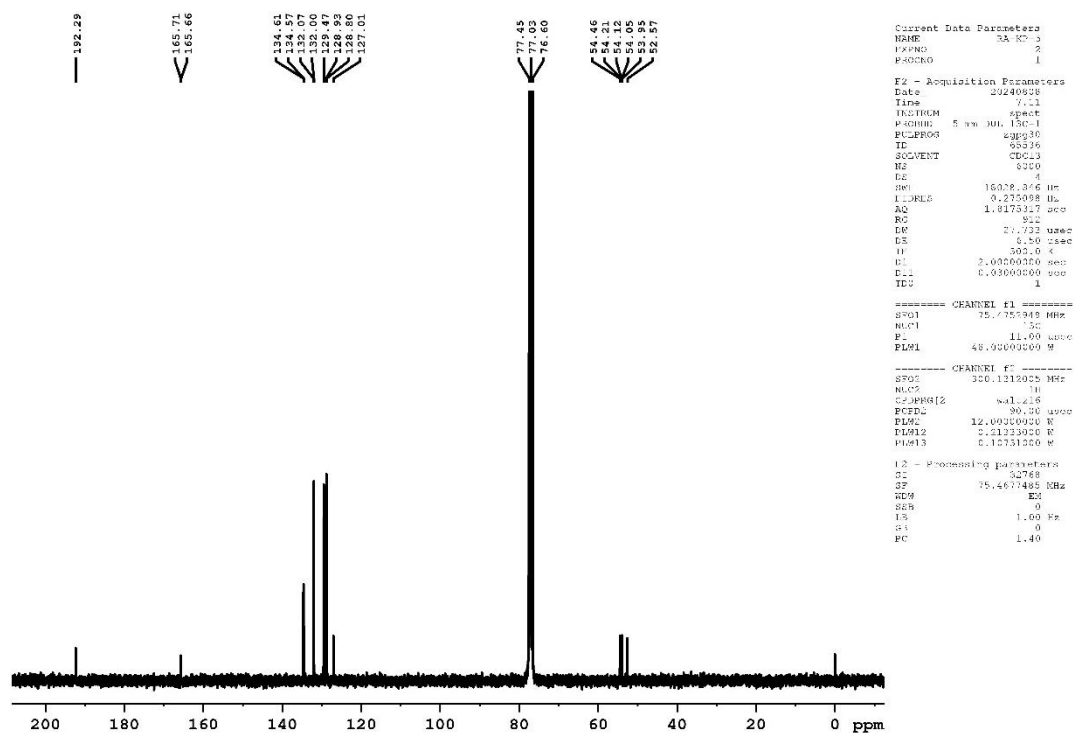

<sup>1</sup>H and <sup>13</sup>C NMR spectra of compound 3g

lab GSK  
kp-5-24

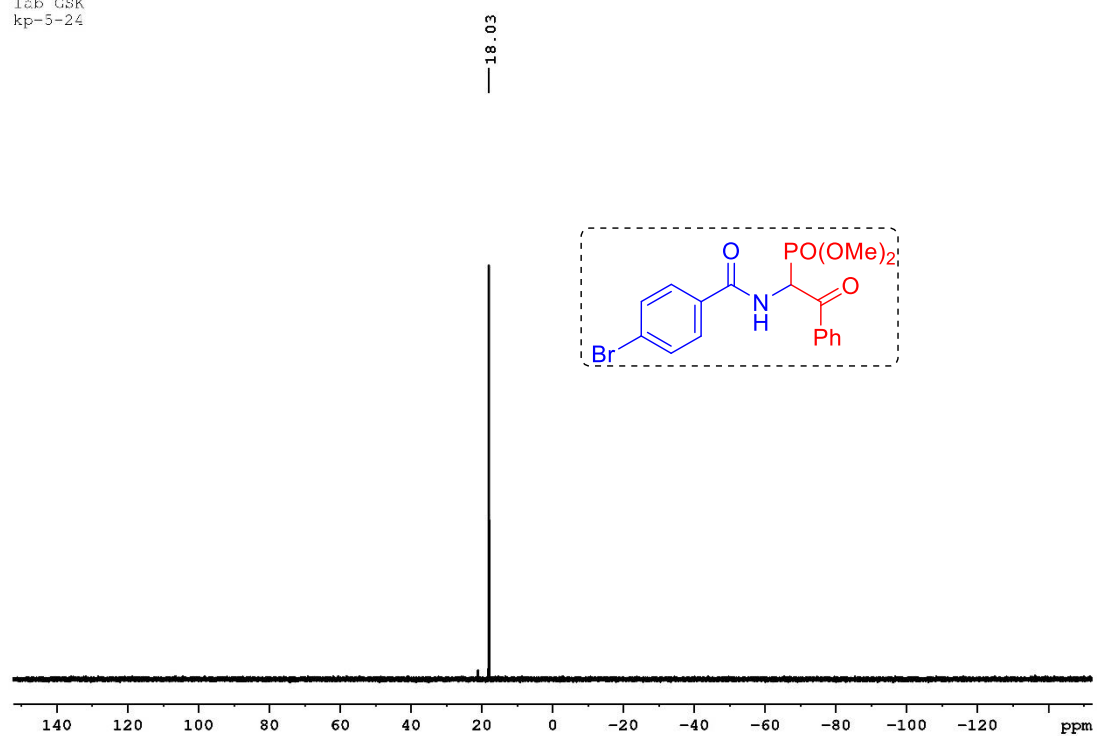

$^{31}\text{P}$  NMR spectrum of compound 3g

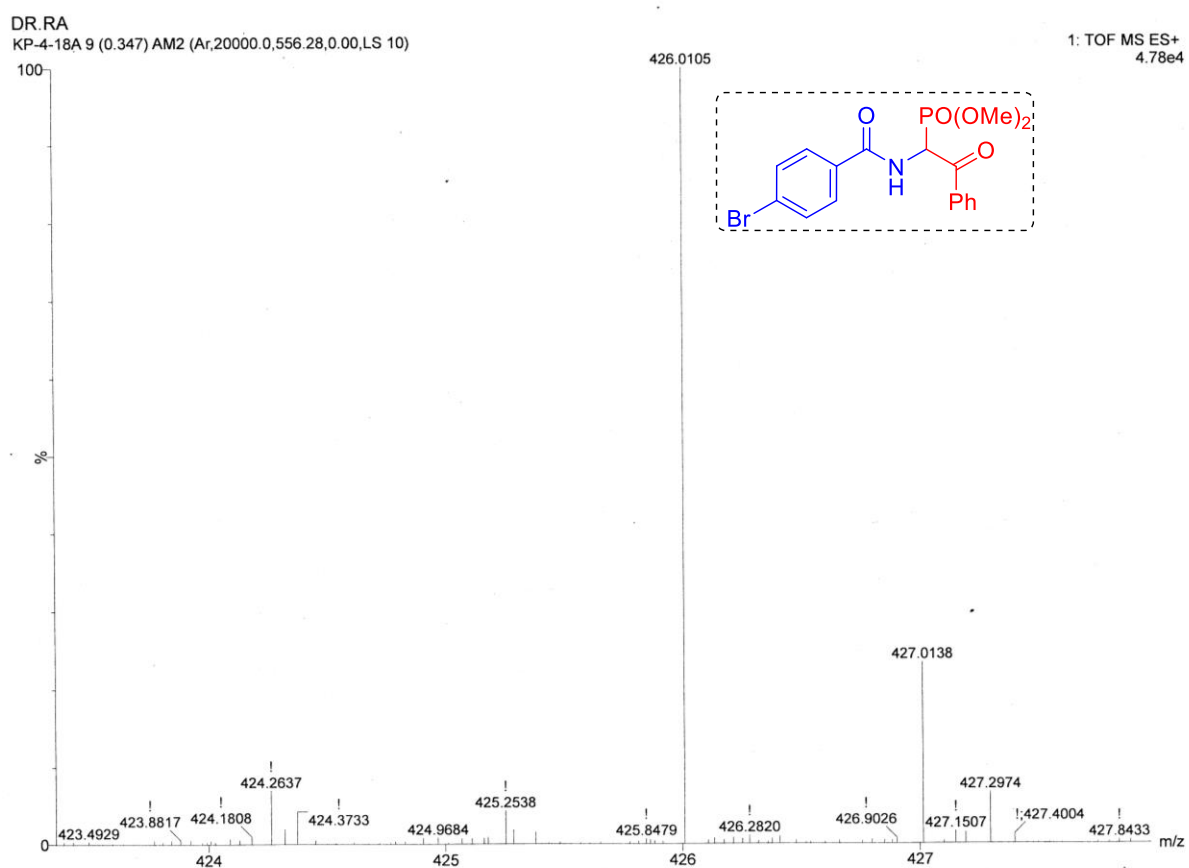

**HRMS spectrum of compound 3g**

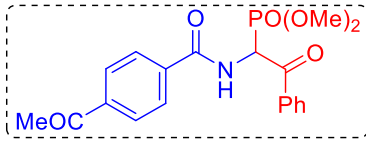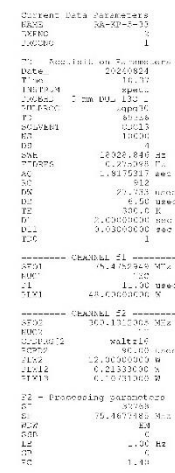

lab GSK  
rk-5-33

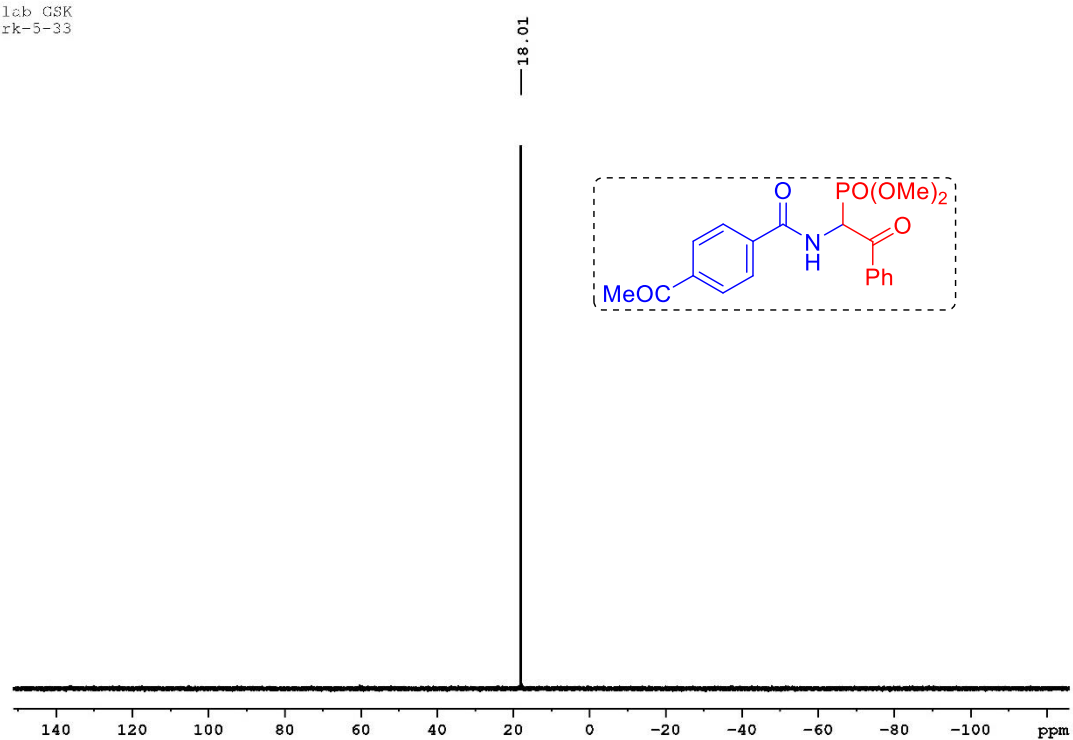

$^{31}\text{P}$  NMR spectrum of compound 3h



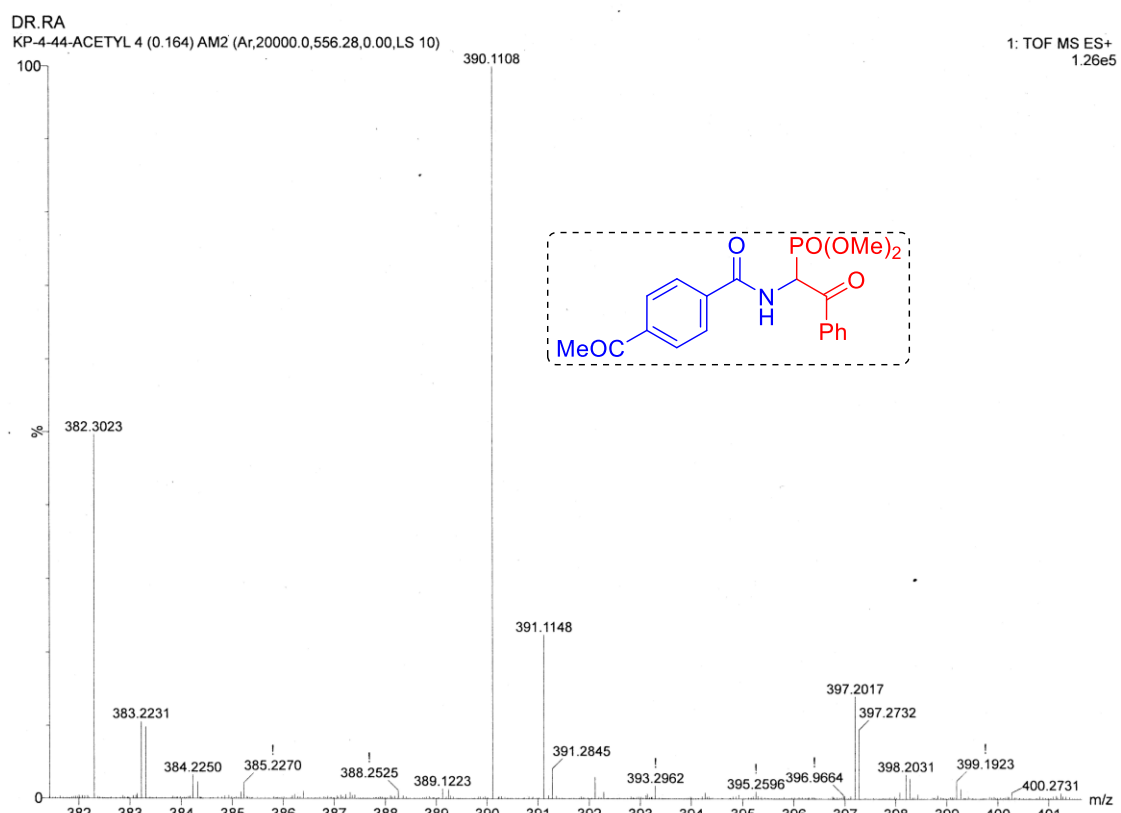

**HRMS spectrum of compound 3h**

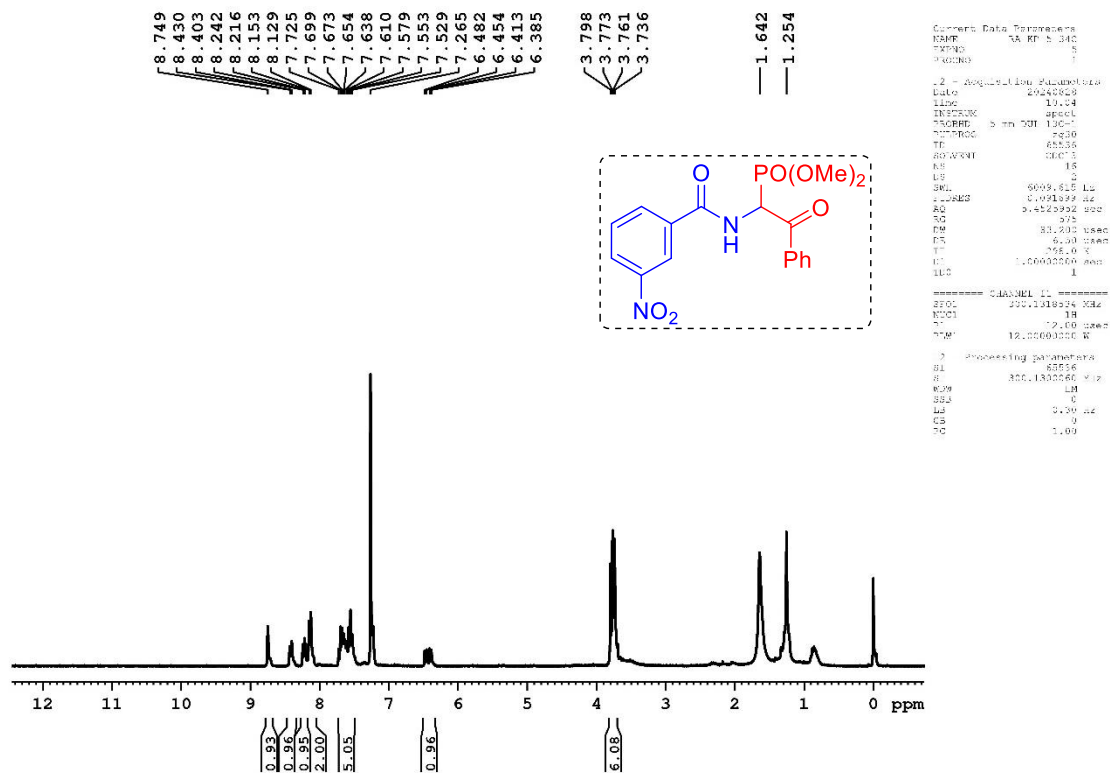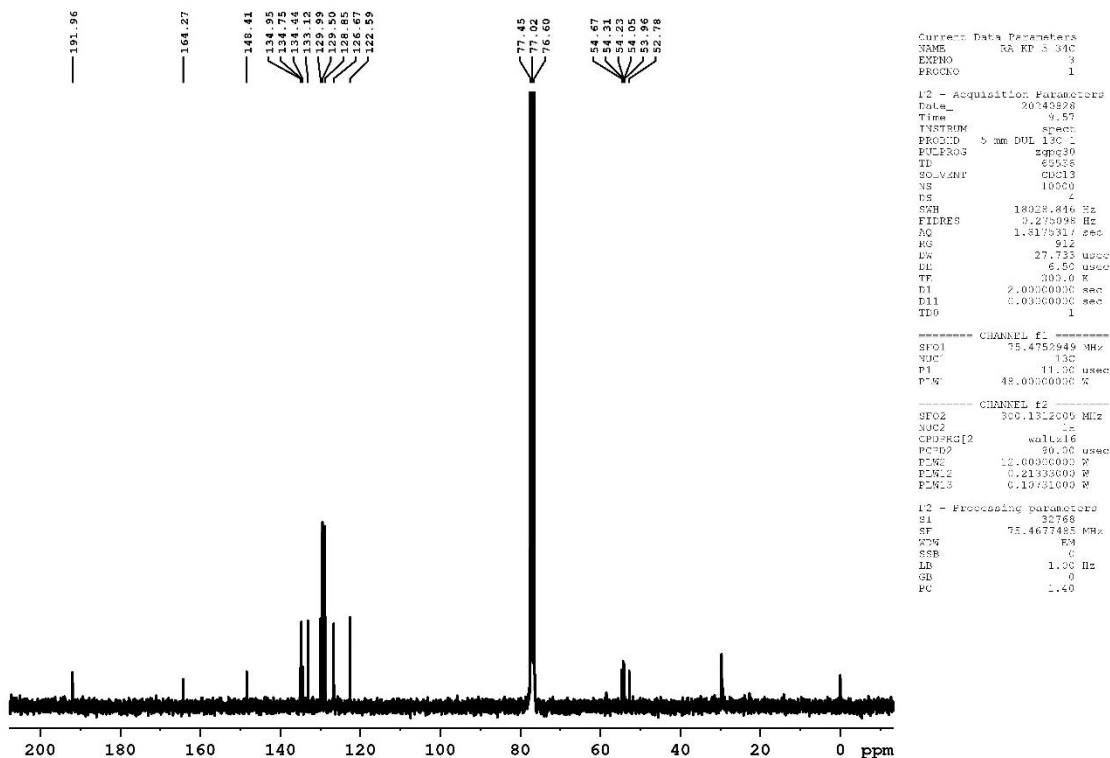

<sup>1</sup>H and <sup>13</sup>C NMR spectra of compound 3i

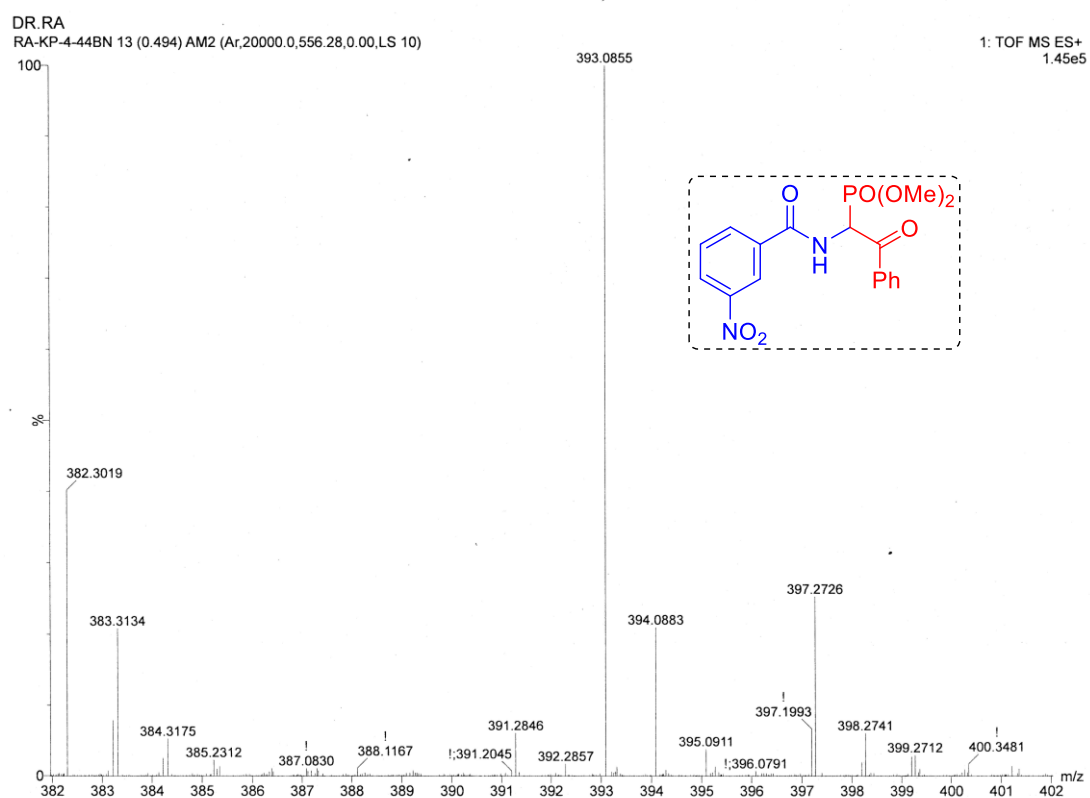

**HRMS spectrum of compound 3i**

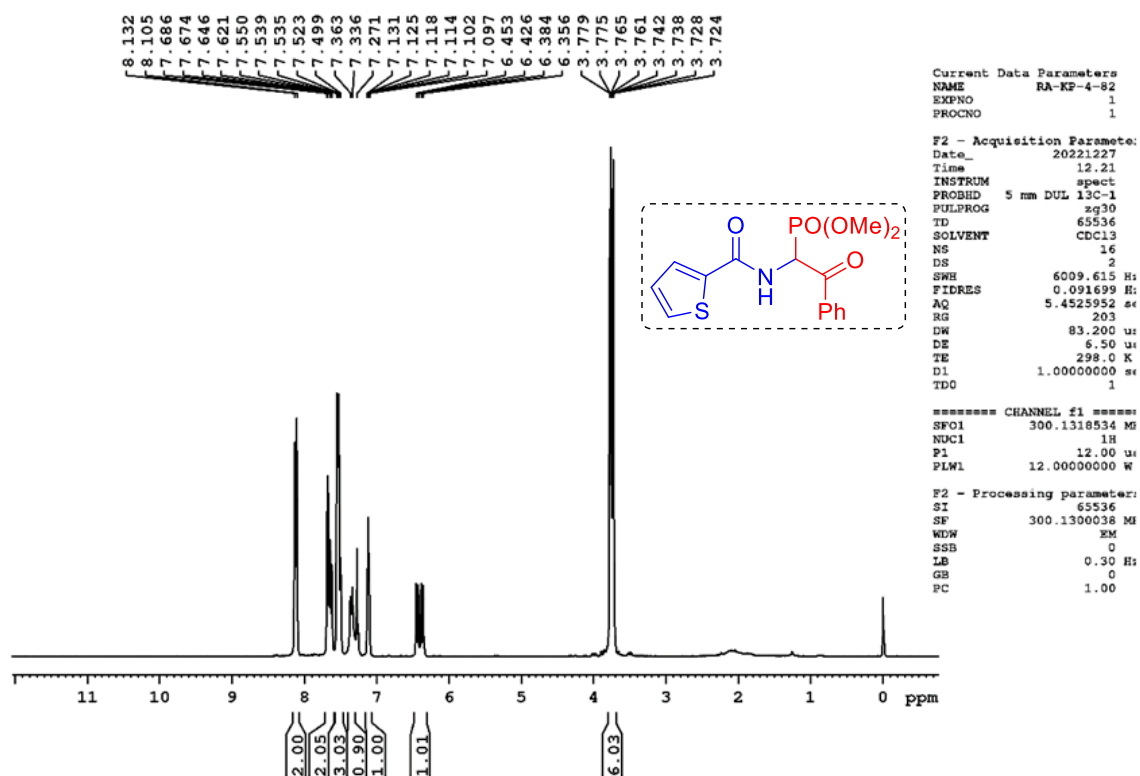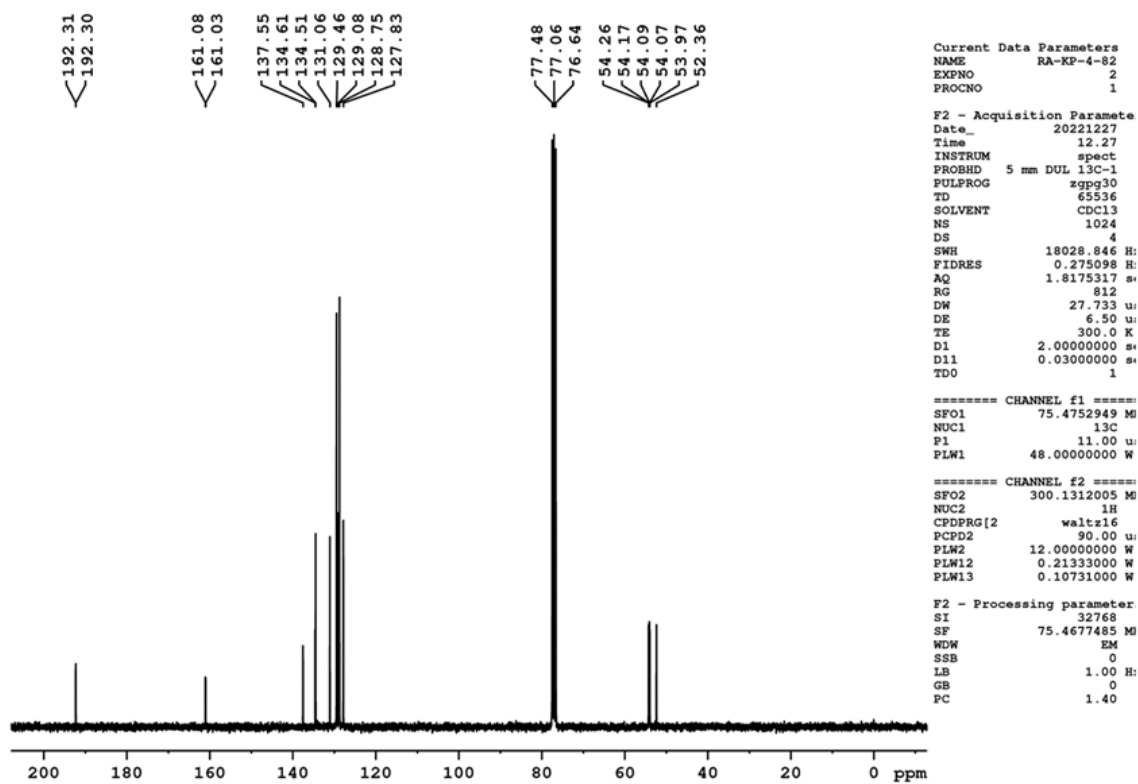

<sup>1</sup>H and <sup>13</sup>C NMR spectra of compound 3j

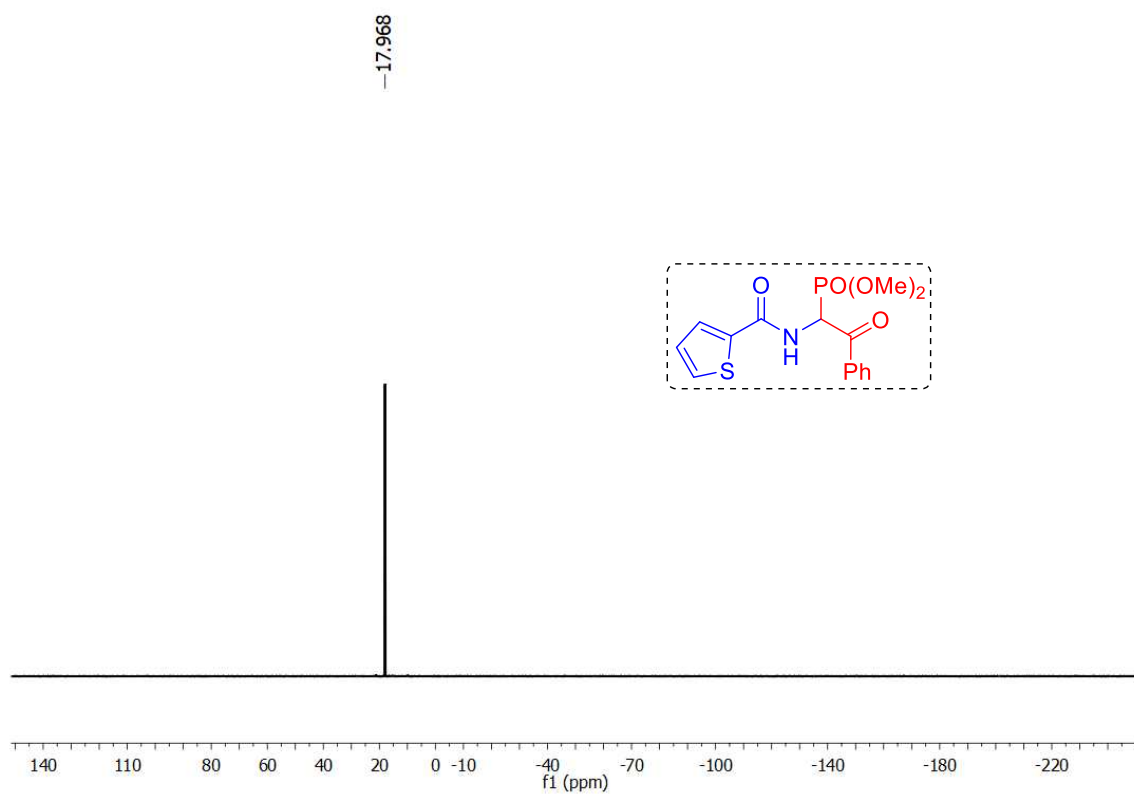

$^{31}\text{P}$  NMR spectrum of compound 3j

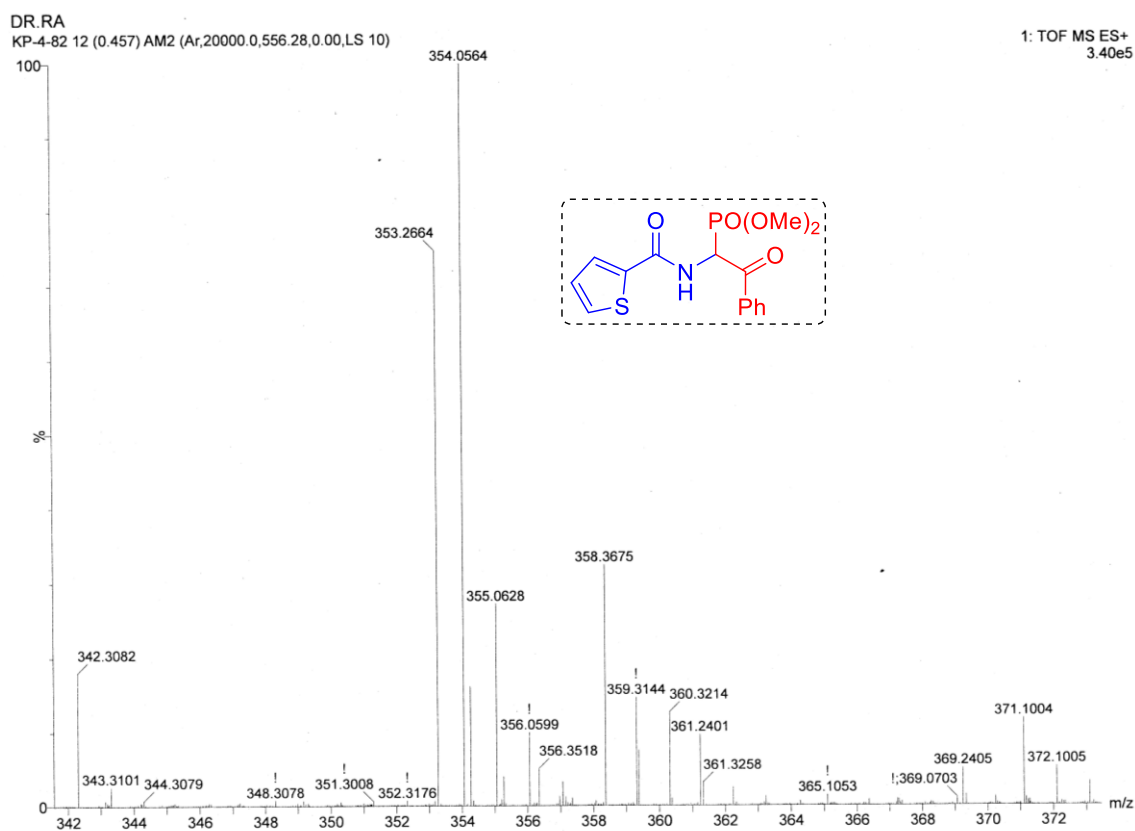

**HRMS spectrum of compound 3j**

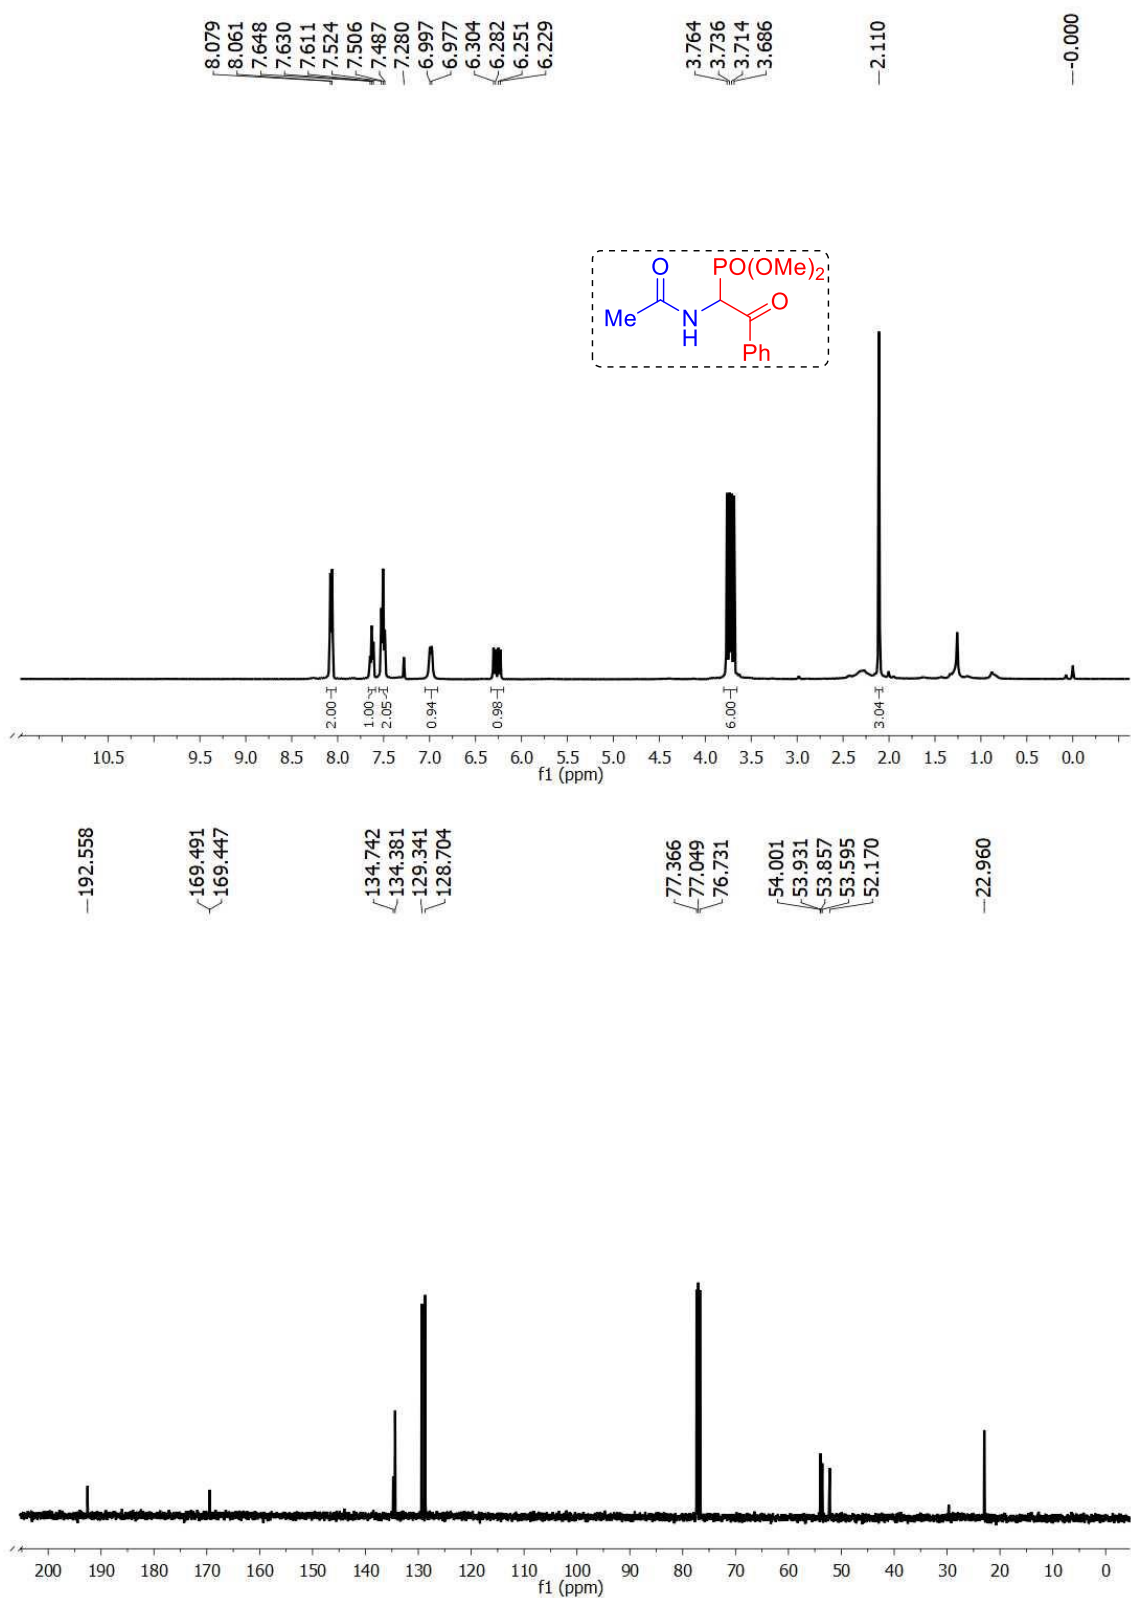

**<sup>1</sup>H and <sup>13</sup>C NMR spectra of compound 3k**

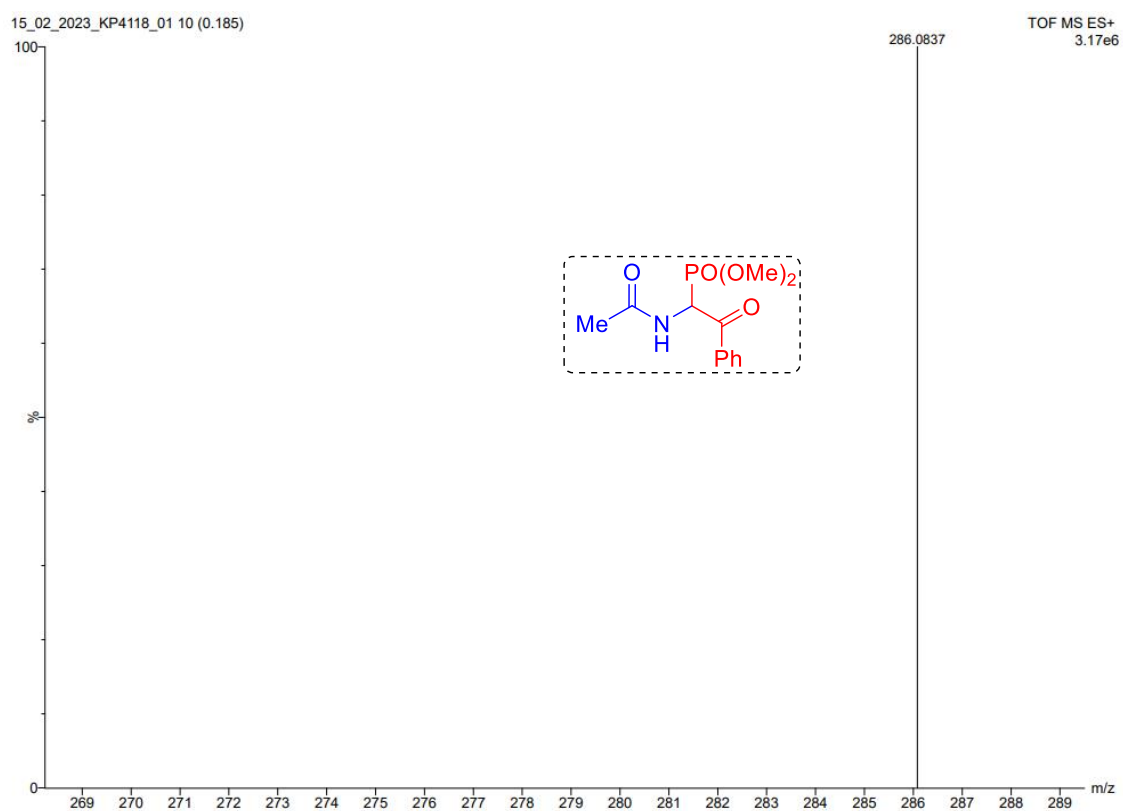

**HRMS spectrum of compound 3k**



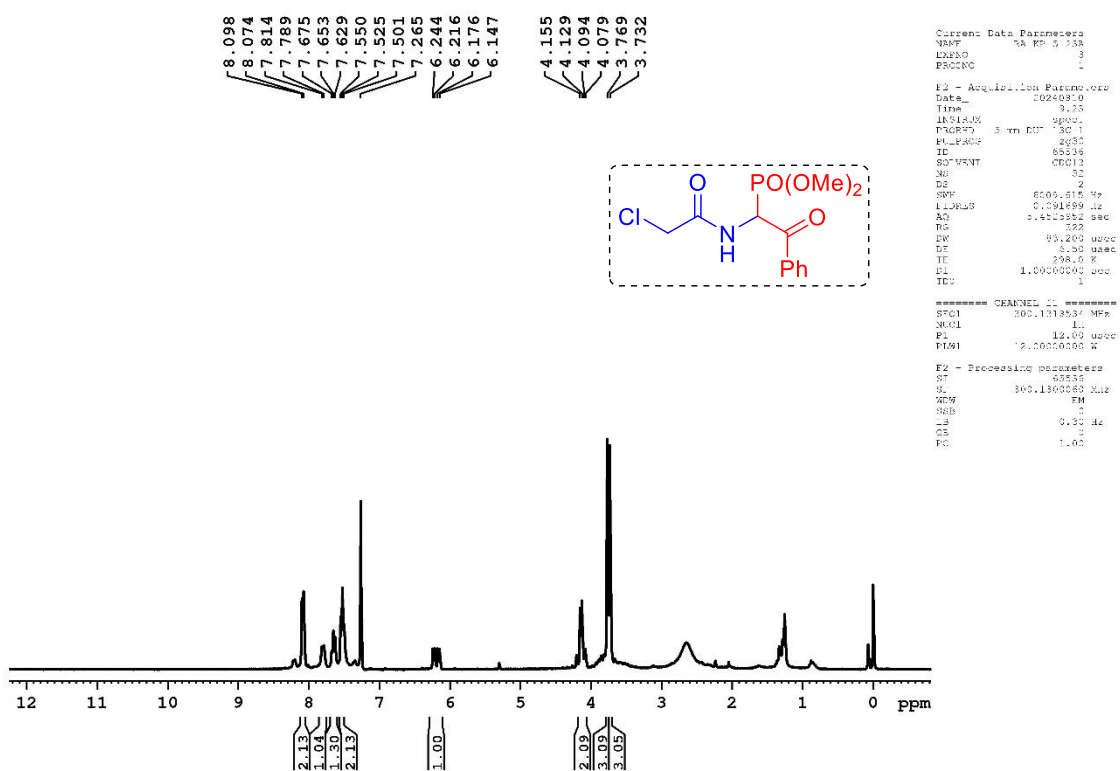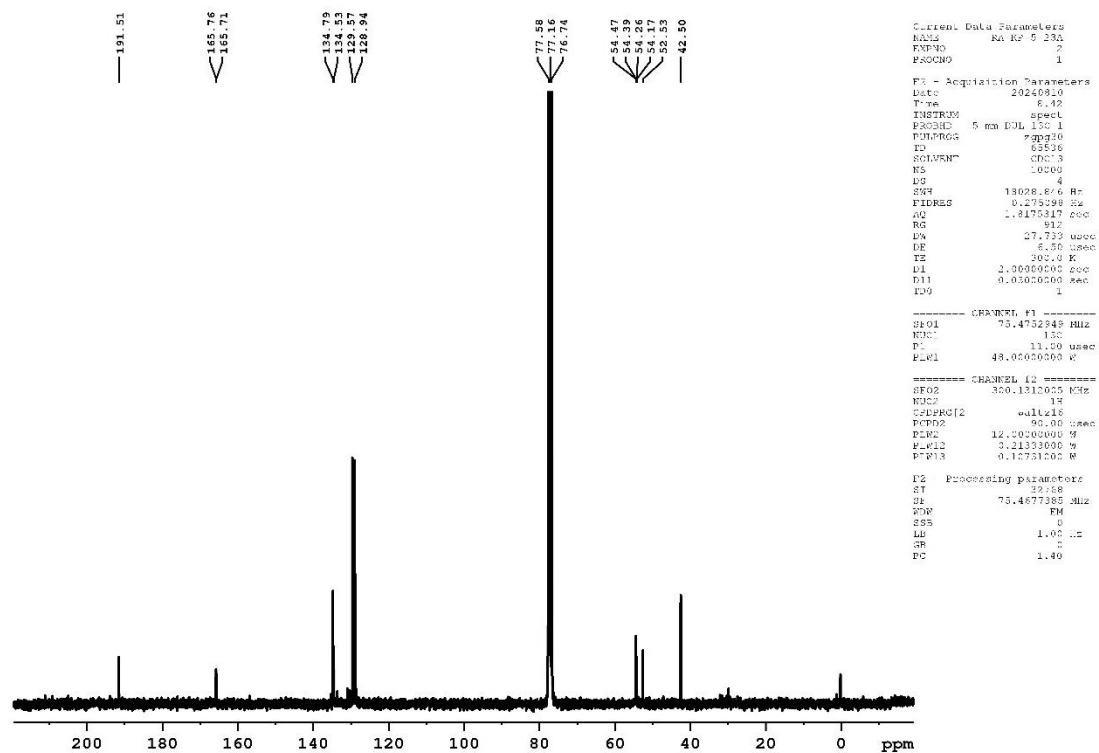

<sup>1</sup>H and <sup>13</sup>C NMR spectra of compound 31

lab GSK  
kp-5-23

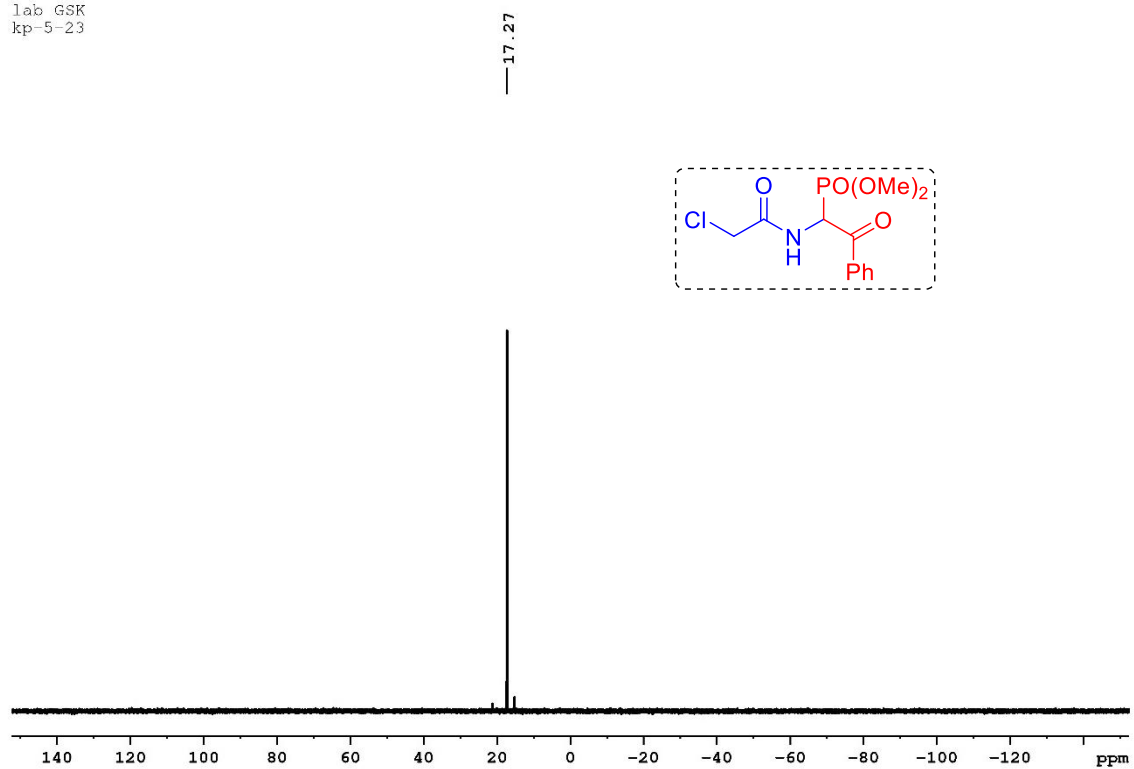

$^{31}\text{P}$  NMR spectrum of compound 3l

DR.RA  
KP-4-63A 19 (0.714) AM2 (Ar,20000.0,556.28,0.00,LS 10)

1: TOF MS ES+  
2.10e5

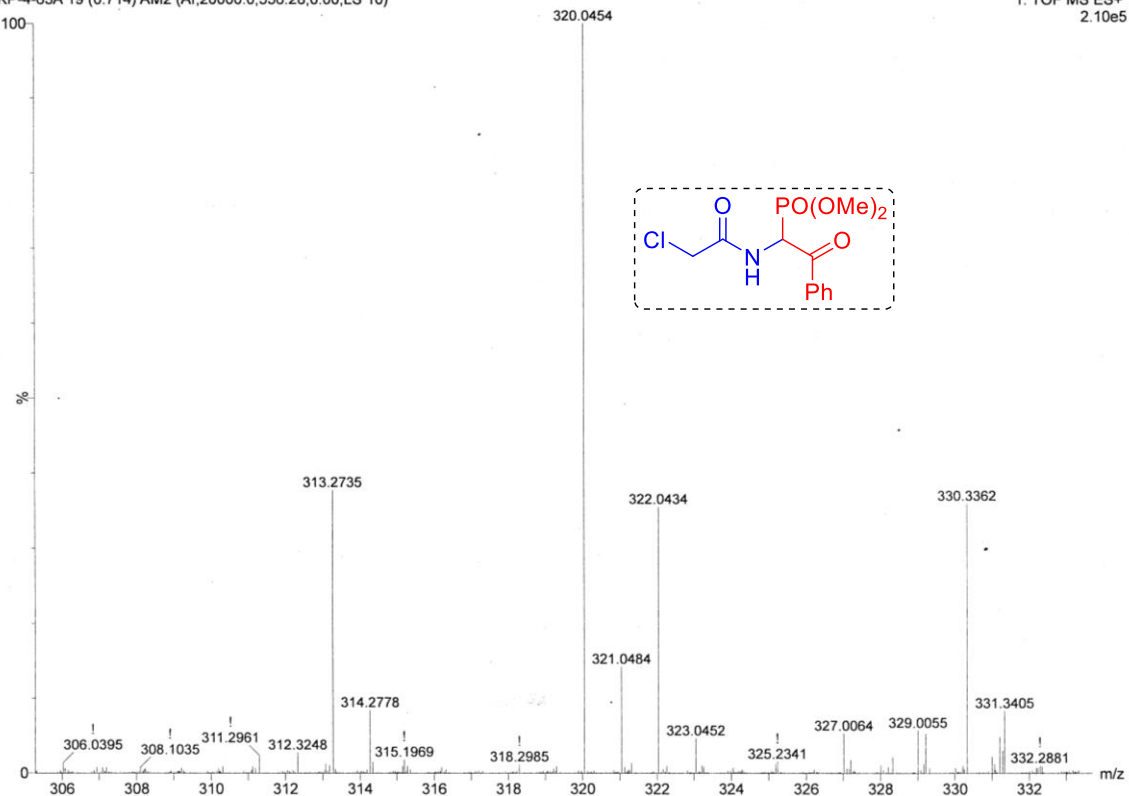

**HRMS spectrum of compound 3l**

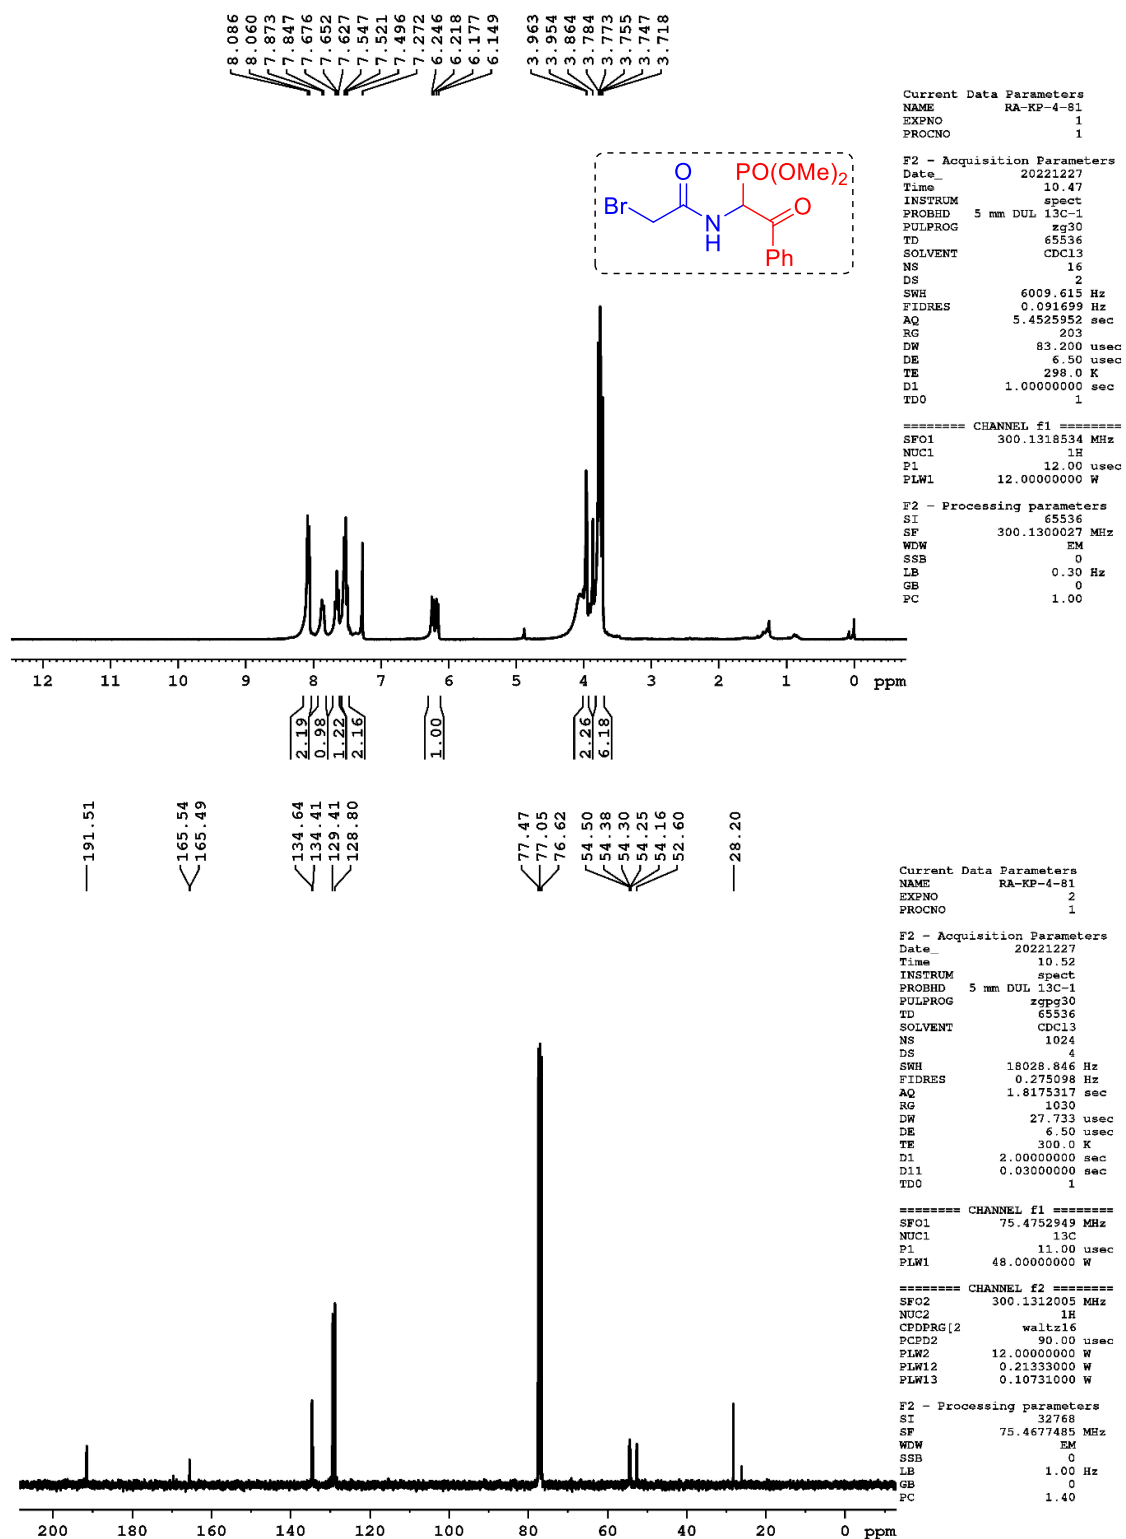

<sup>1</sup>H and <sup>13</sup>C NMR spectra of compound 3m

KP-4-81 19 (0.714) AM2 (Ar,20000.0,556.28,0.00,LS 10)

1: TOF MS ES+  
1.47e4

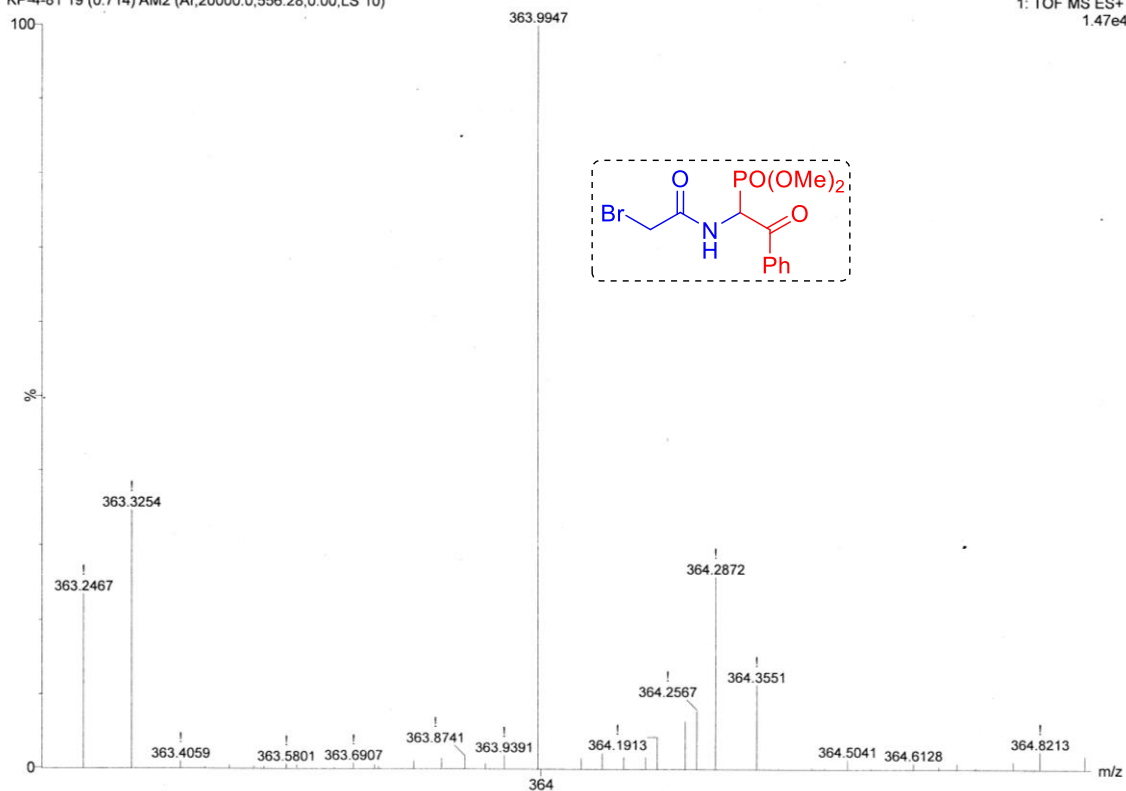

HRMS spectrum of compound 3m

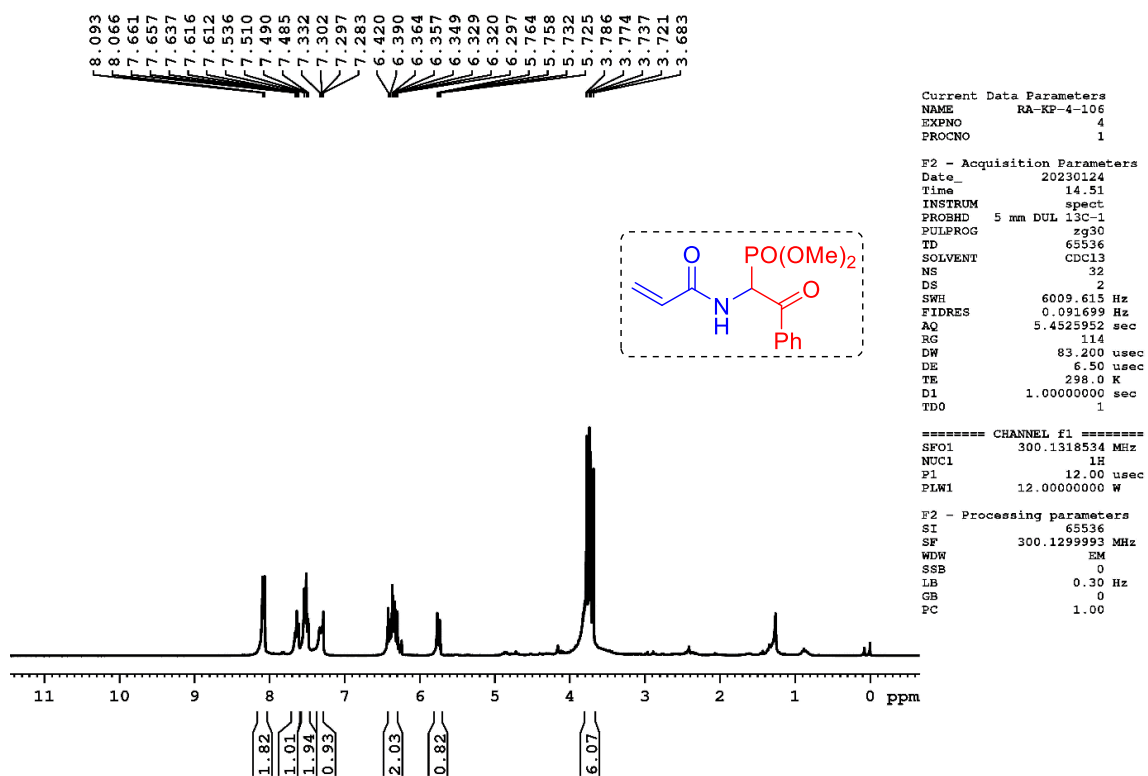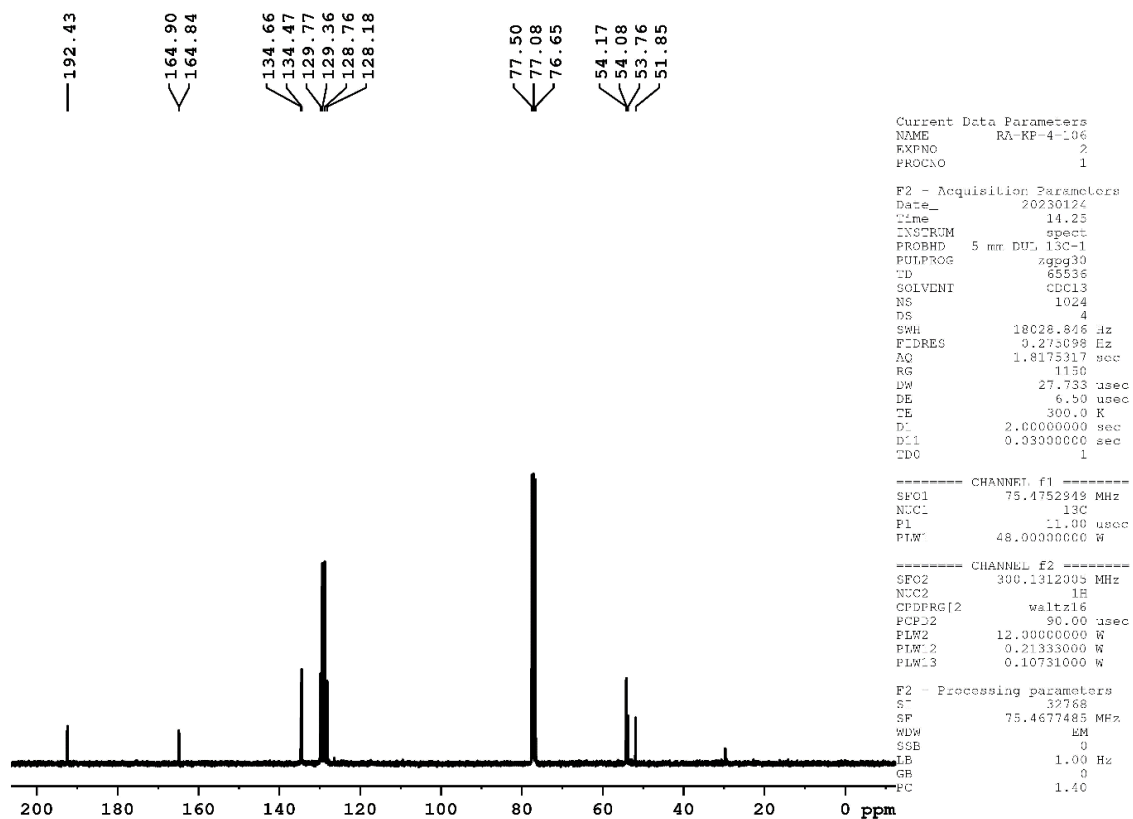

**<sup>1</sup>H and <sup>13</sup>C NMR spectra of compound 3n**

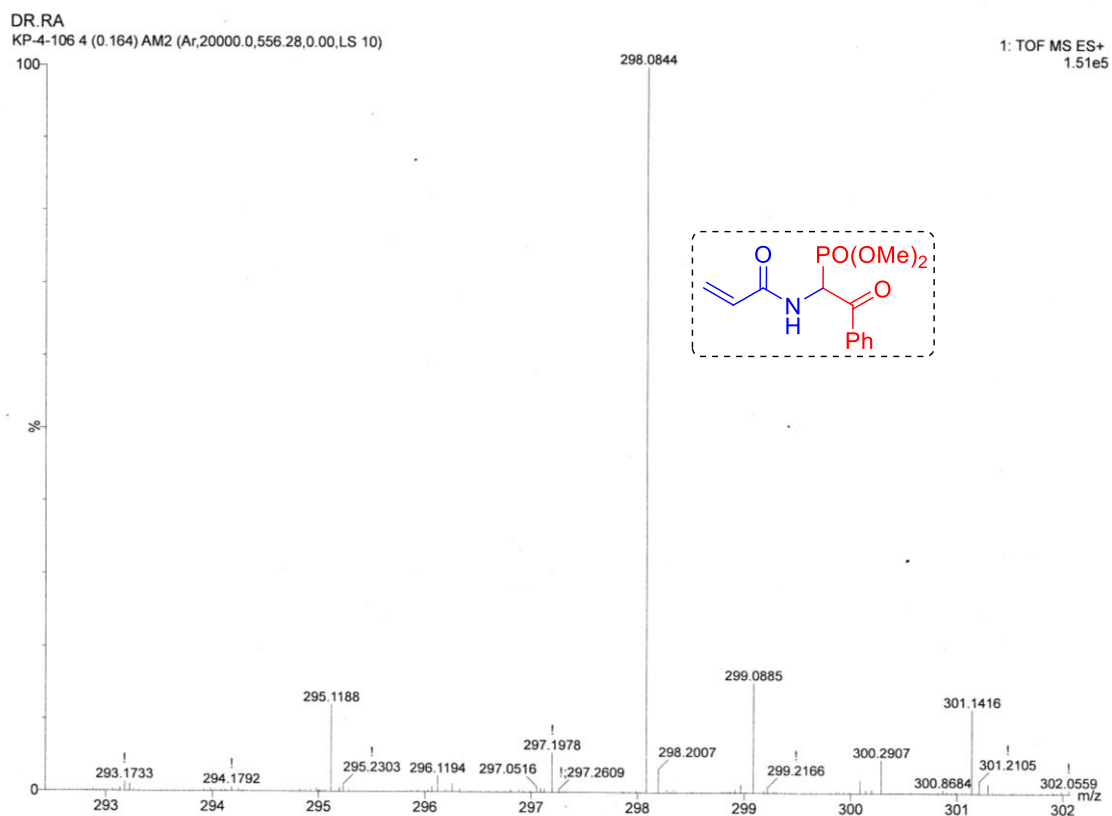

**HRMS spectrum of compound 3n**

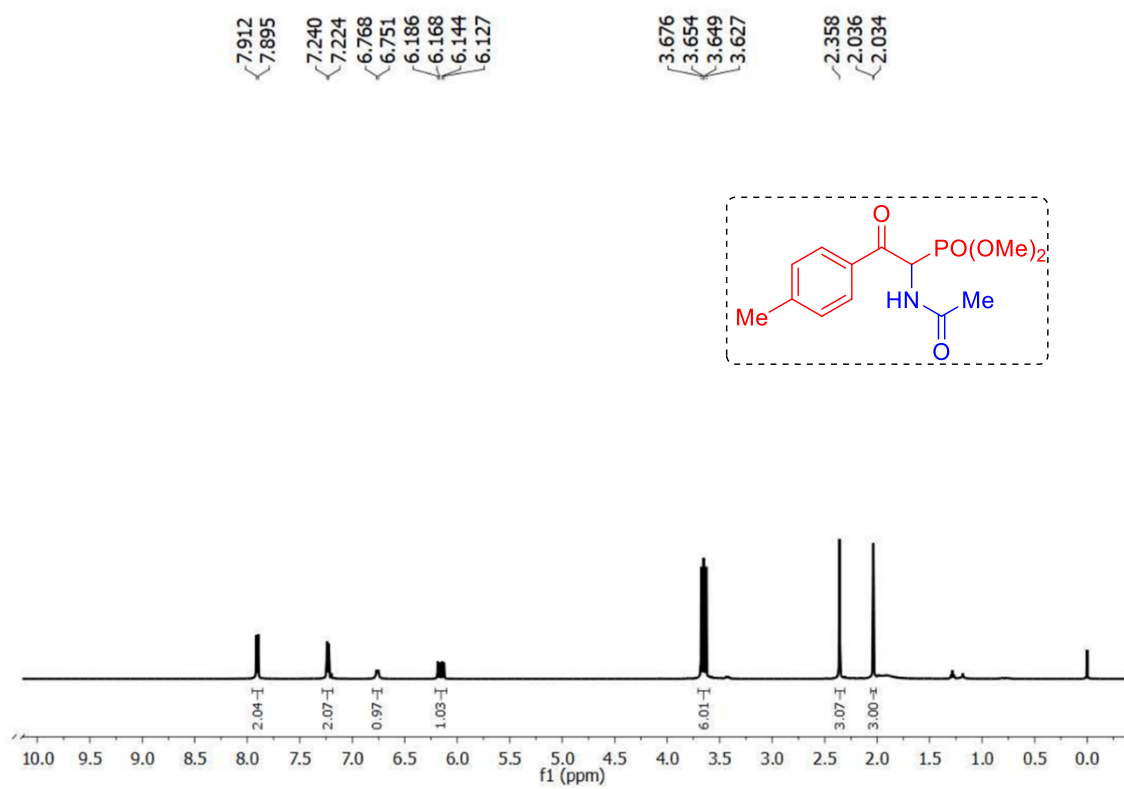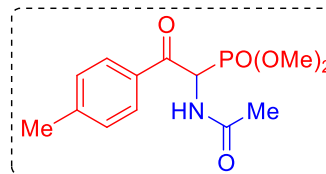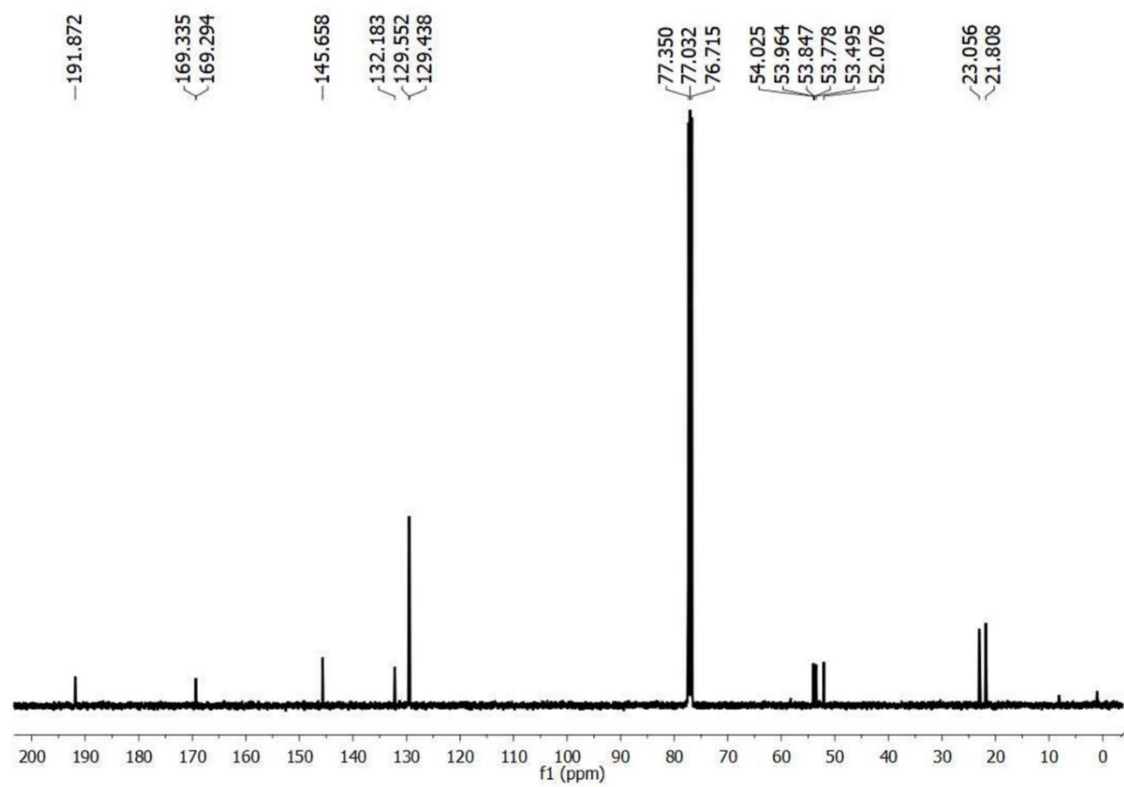

**<sup>1</sup>H and <sup>13</sup>C NMR spectra of compound 4a**



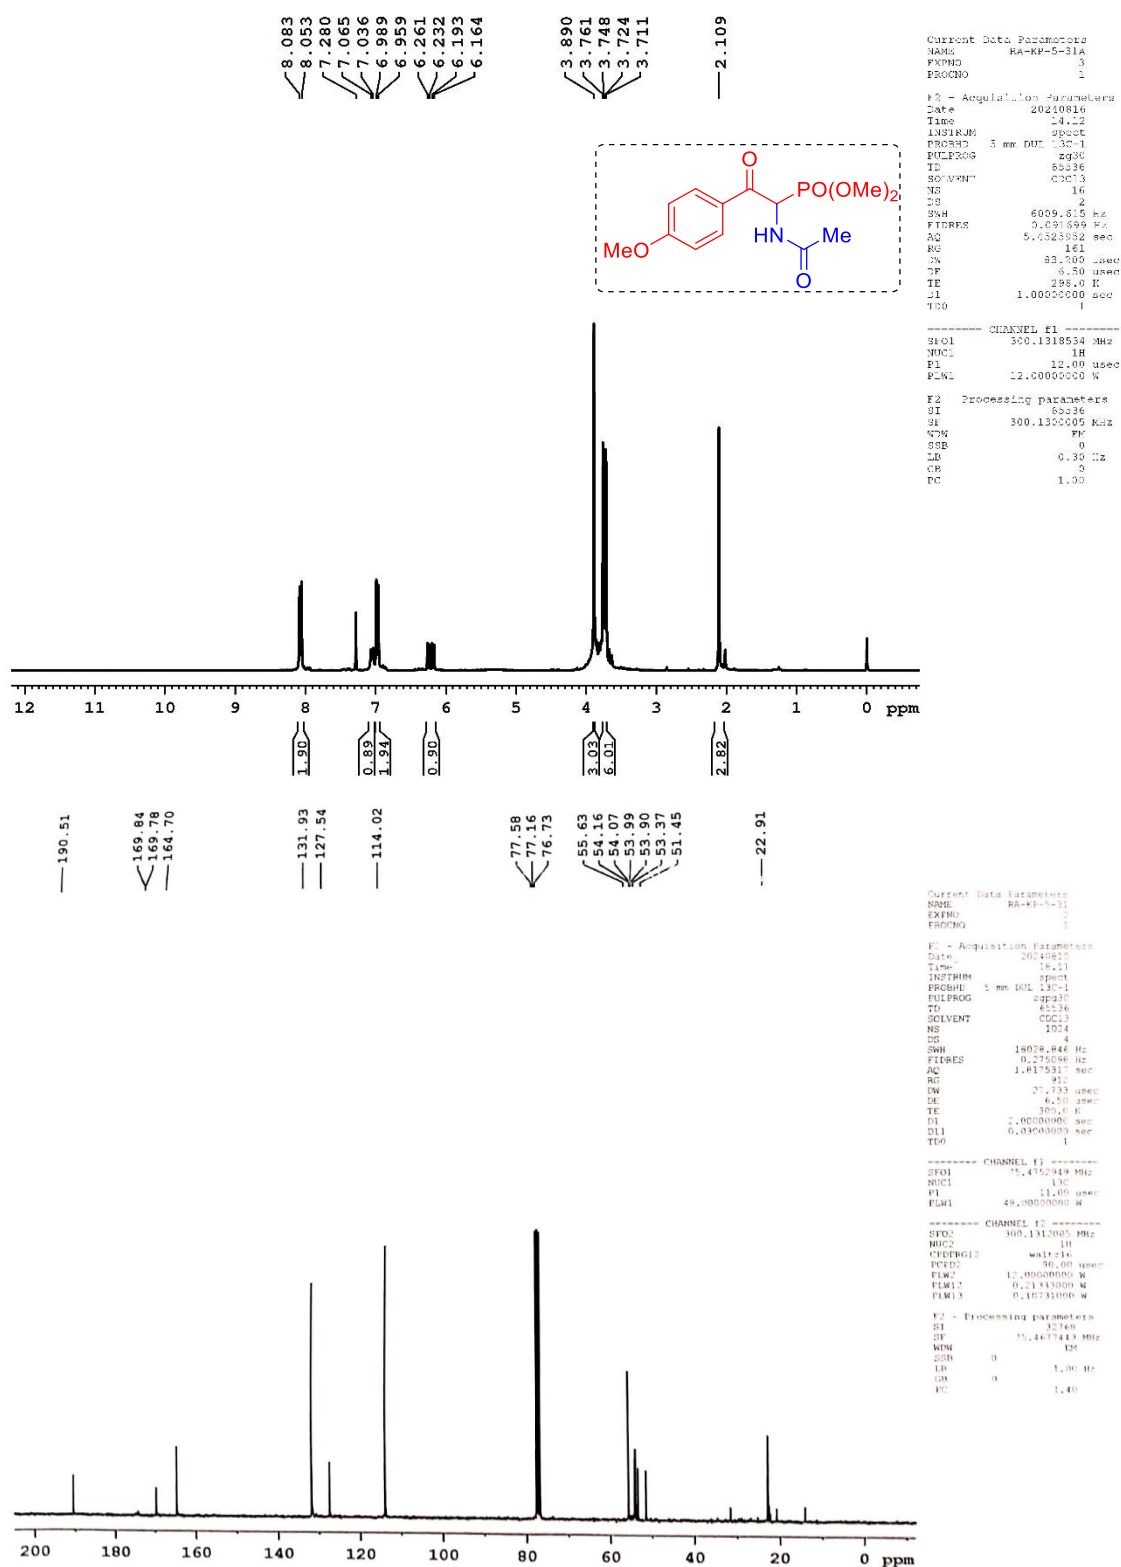

**<sup>1</sup>H and <sup>13</sup>C NMR spectra of compound 4b**

lab GSK  
rk-5-31

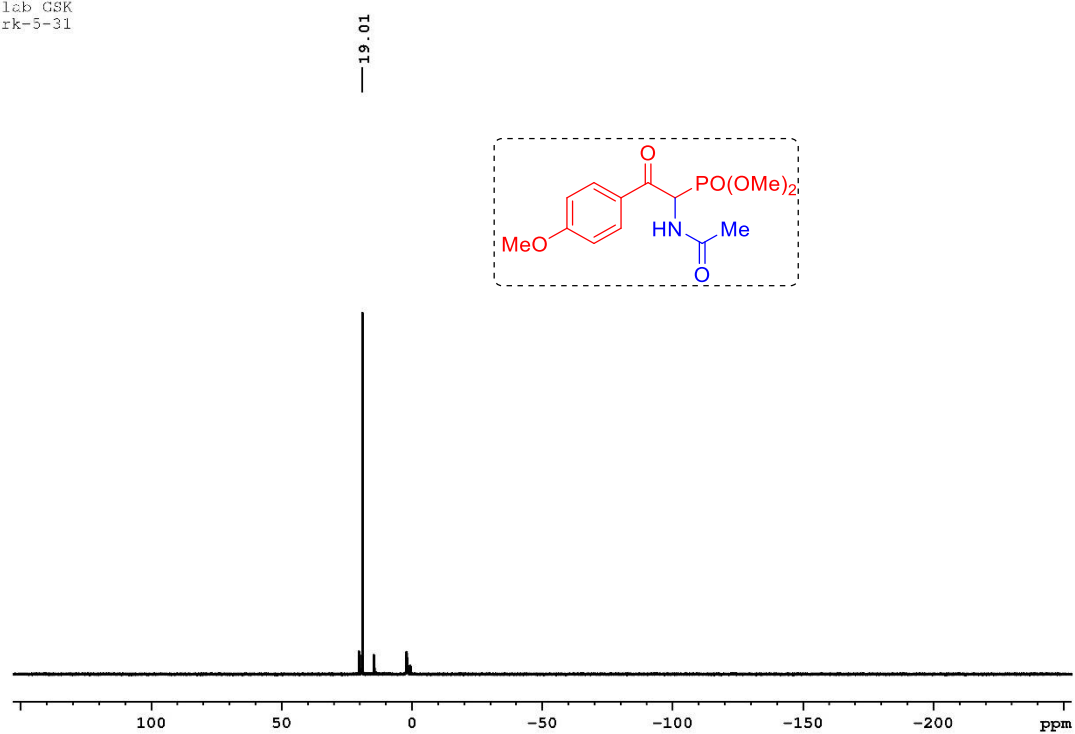

$^{31}\text{P}$  NMR spectrum of compound 4b

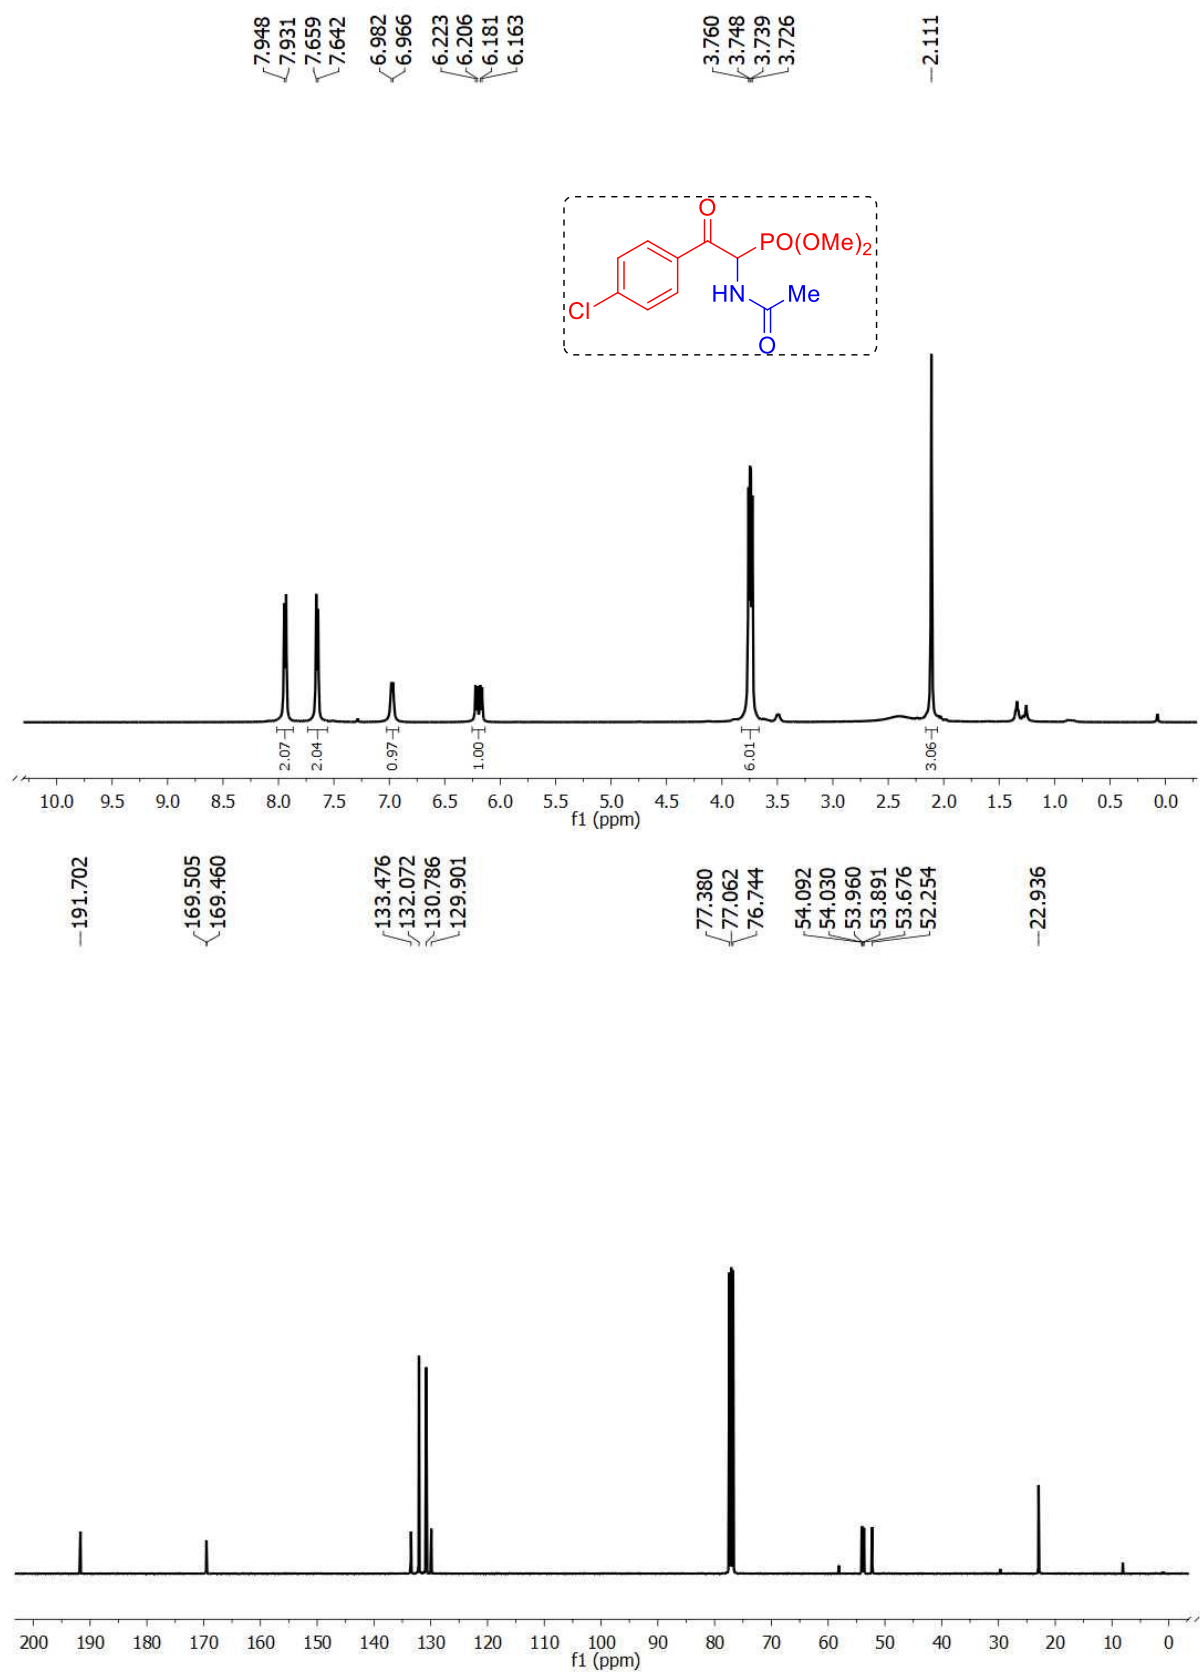

**<sup>1</sup>H and <sup>13</sup>C NMR spectra of compound 4c**

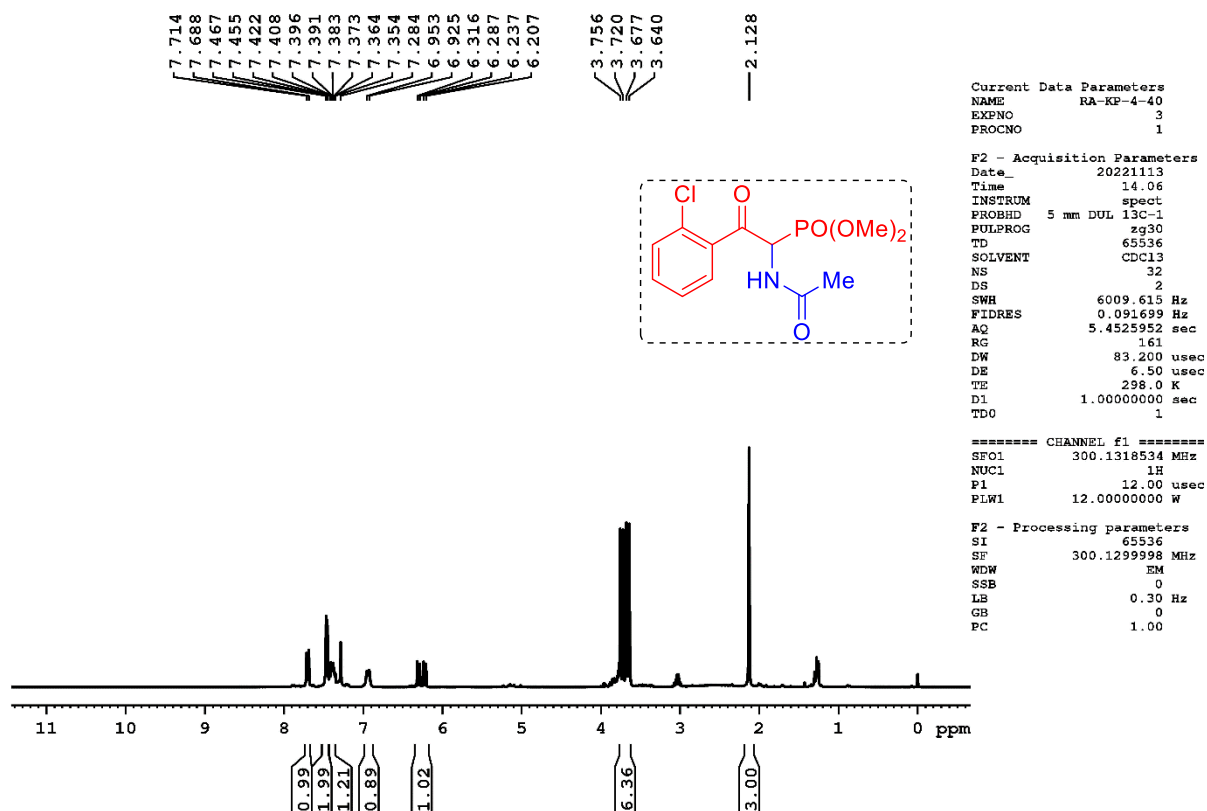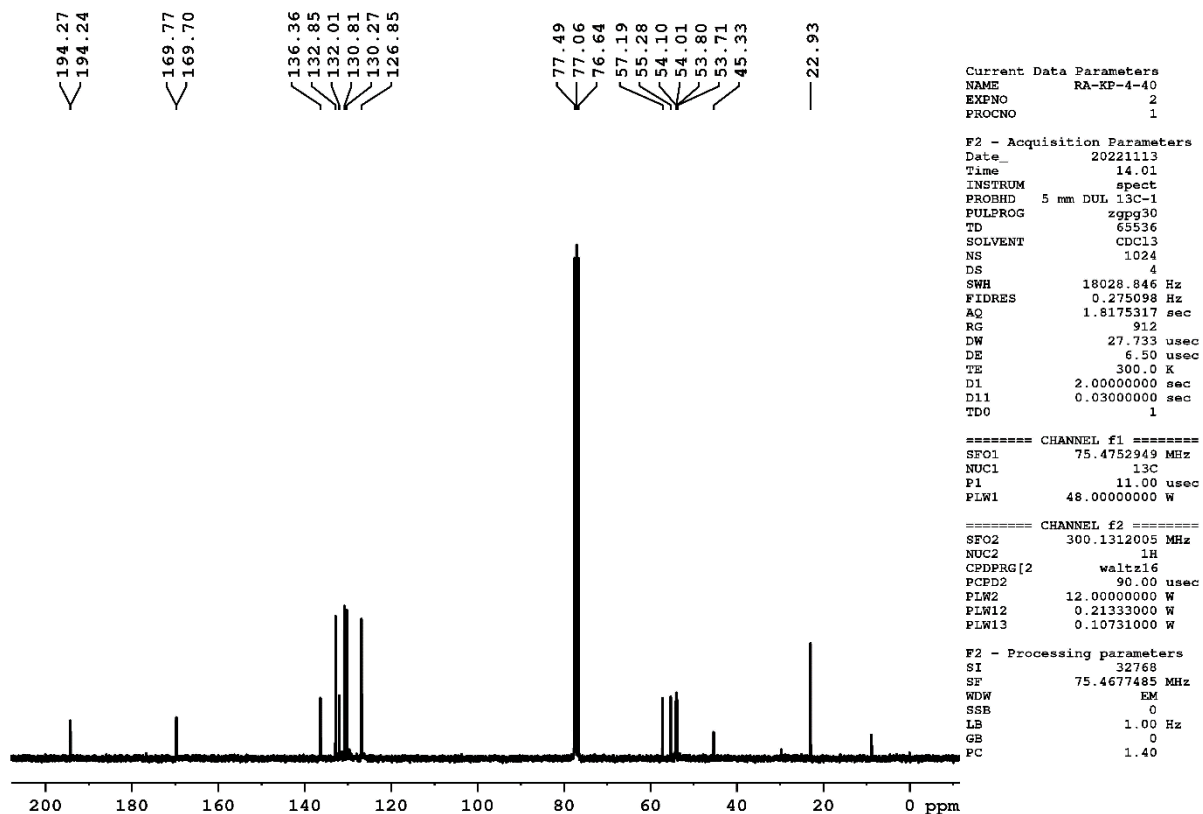

<sup>1</sup>H and <sup>13</sup>C NMR spectra of compound 4d

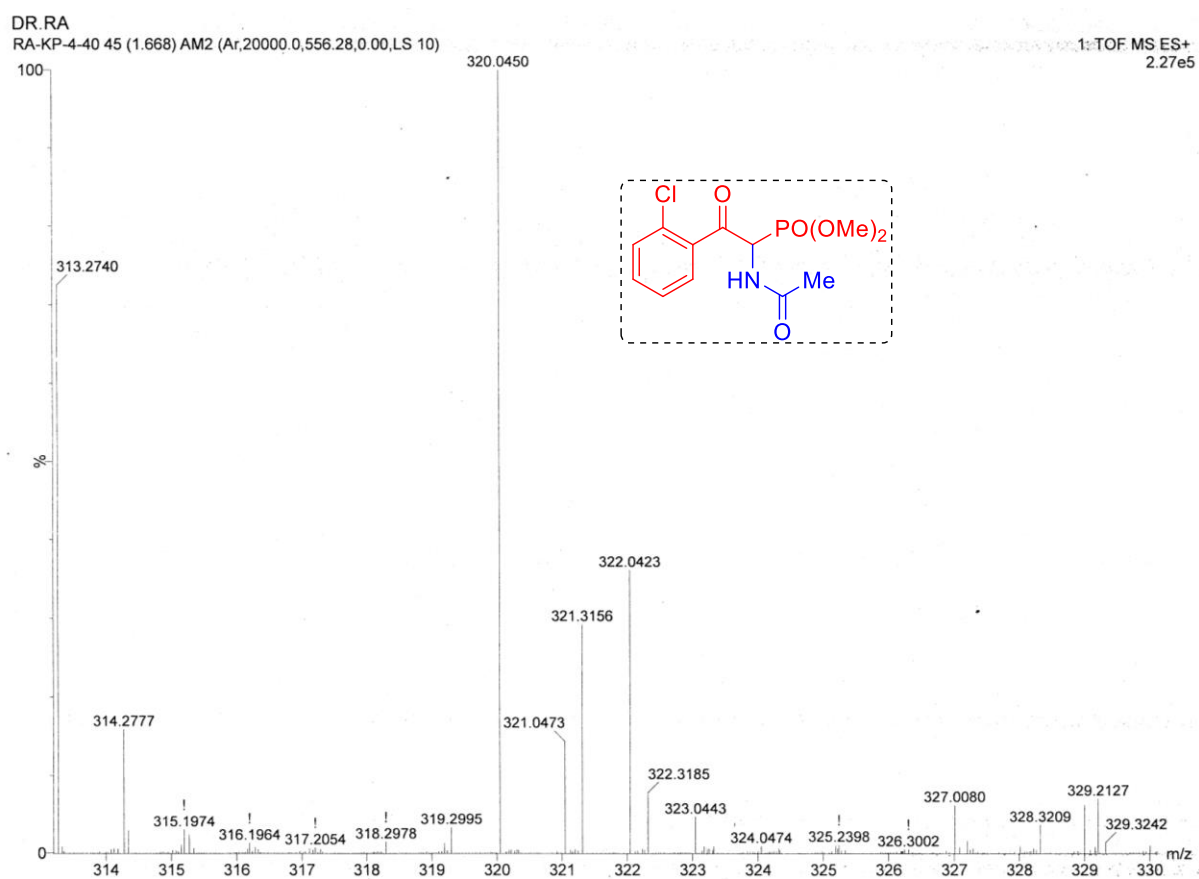

**HRMS spectrum of compound 4d**

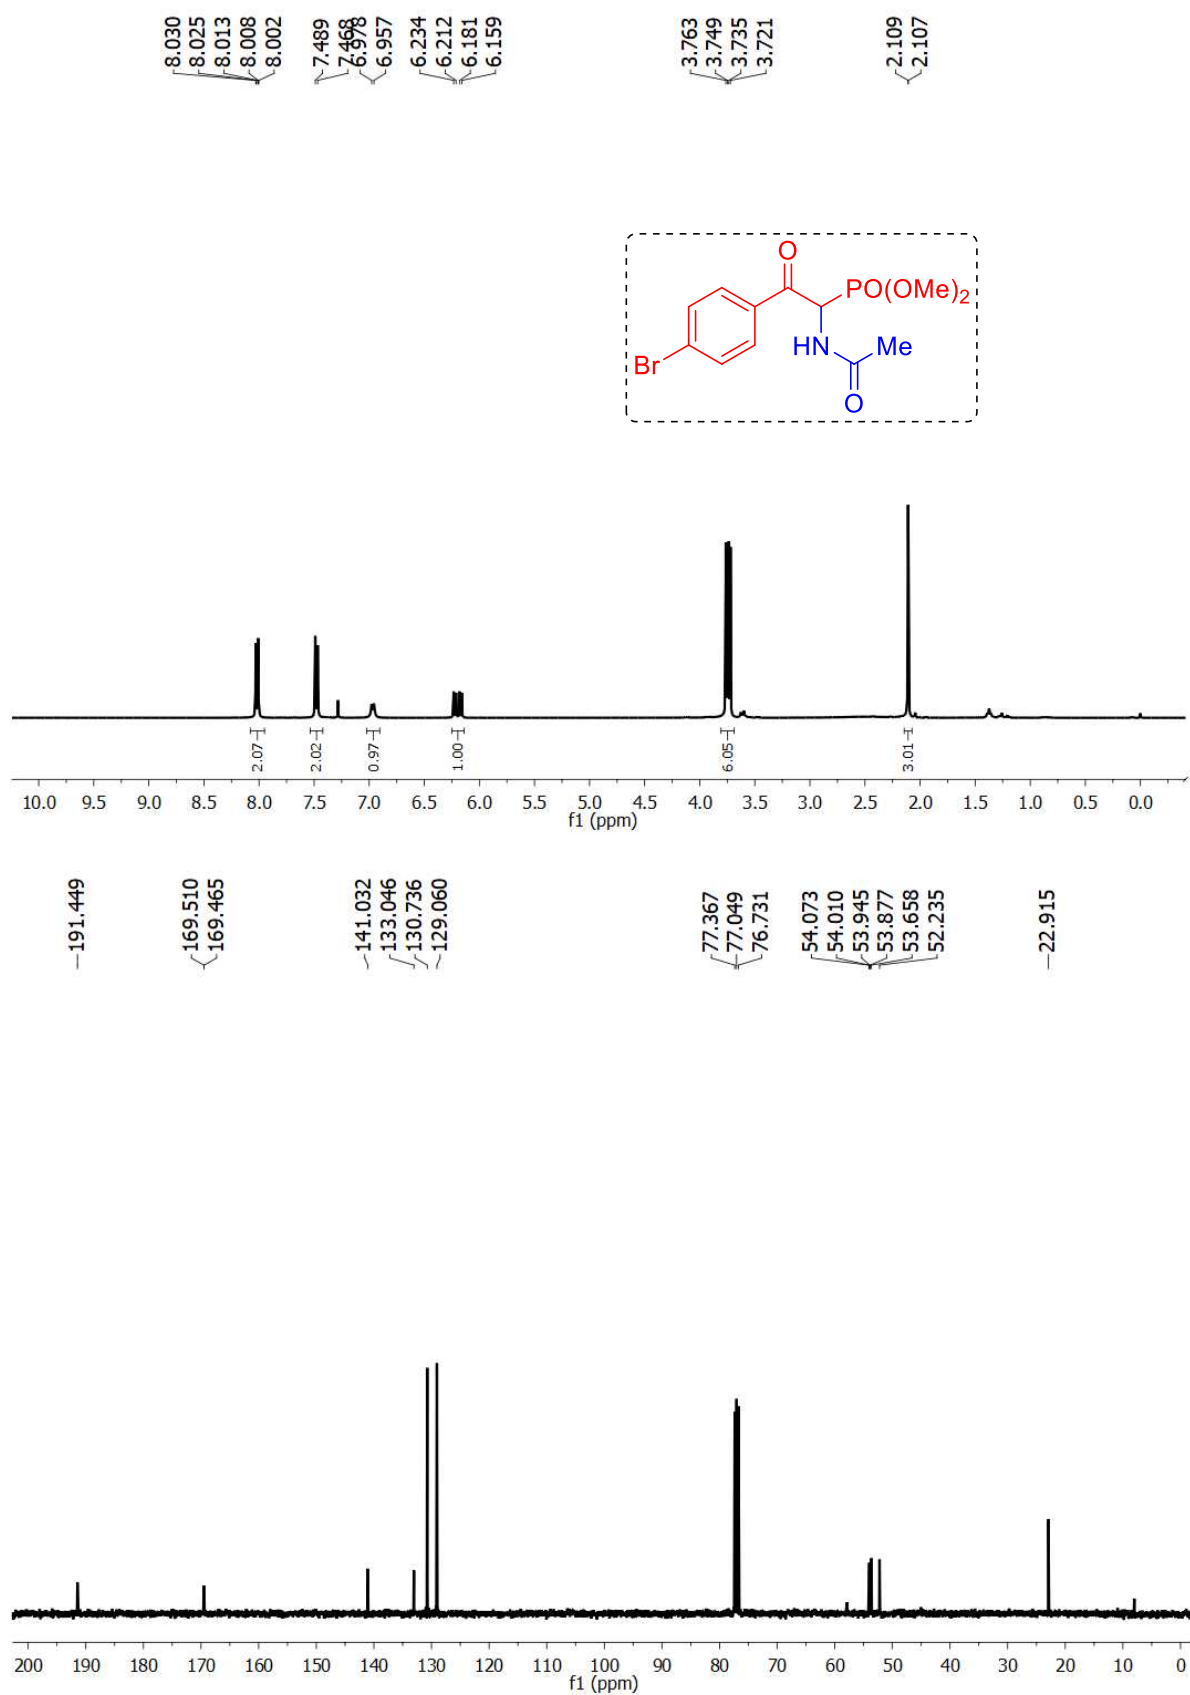

**<sup>1</sup>H and <sup>13</sup>C NMR spectra of compound 4e**

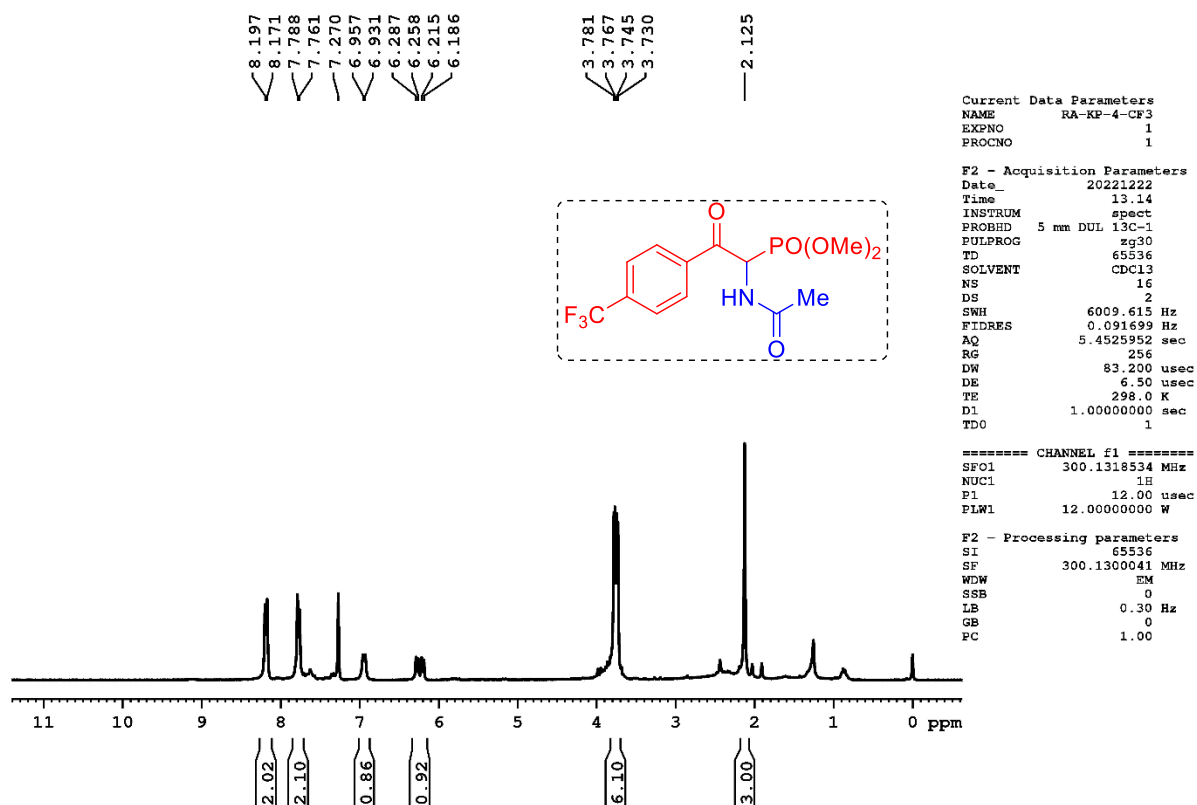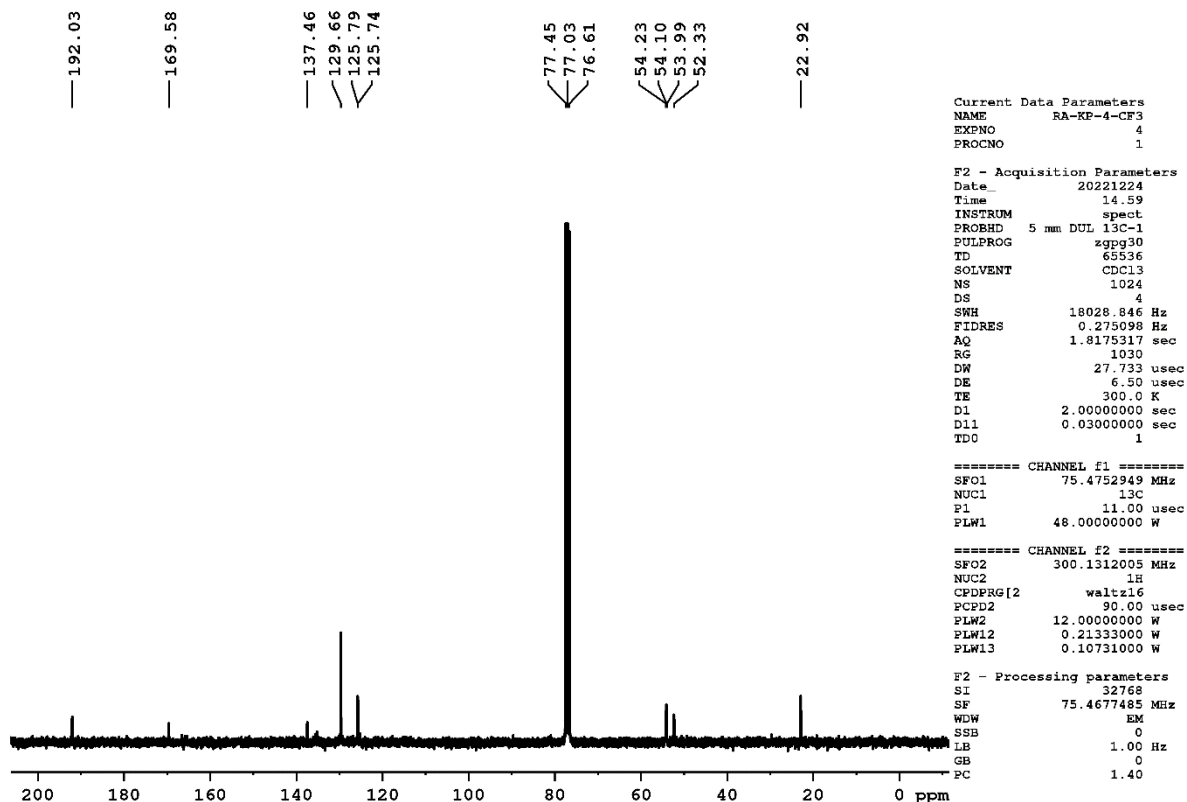

<sup>1</sup>H and <sup>13</sup>C NMR spectra of compound 4f

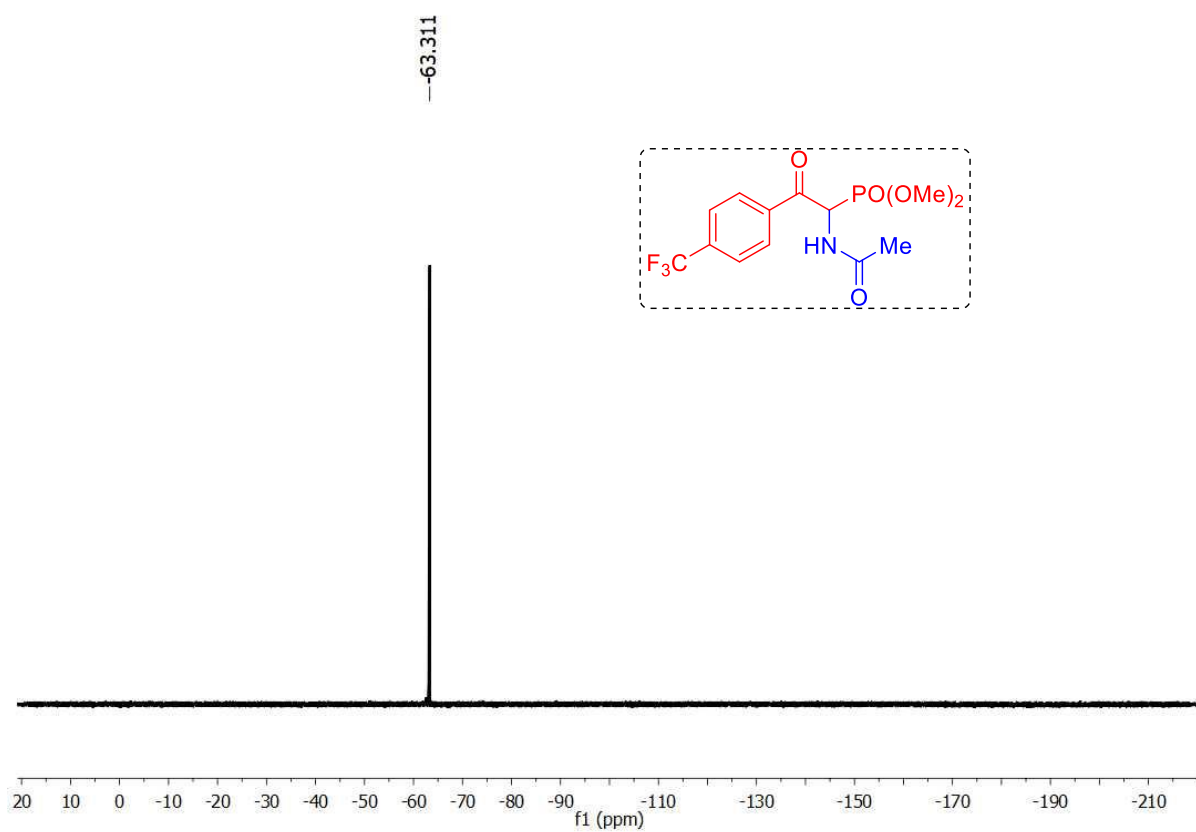

$^{19}\text{F}$  NMR spectrum of compound 4f



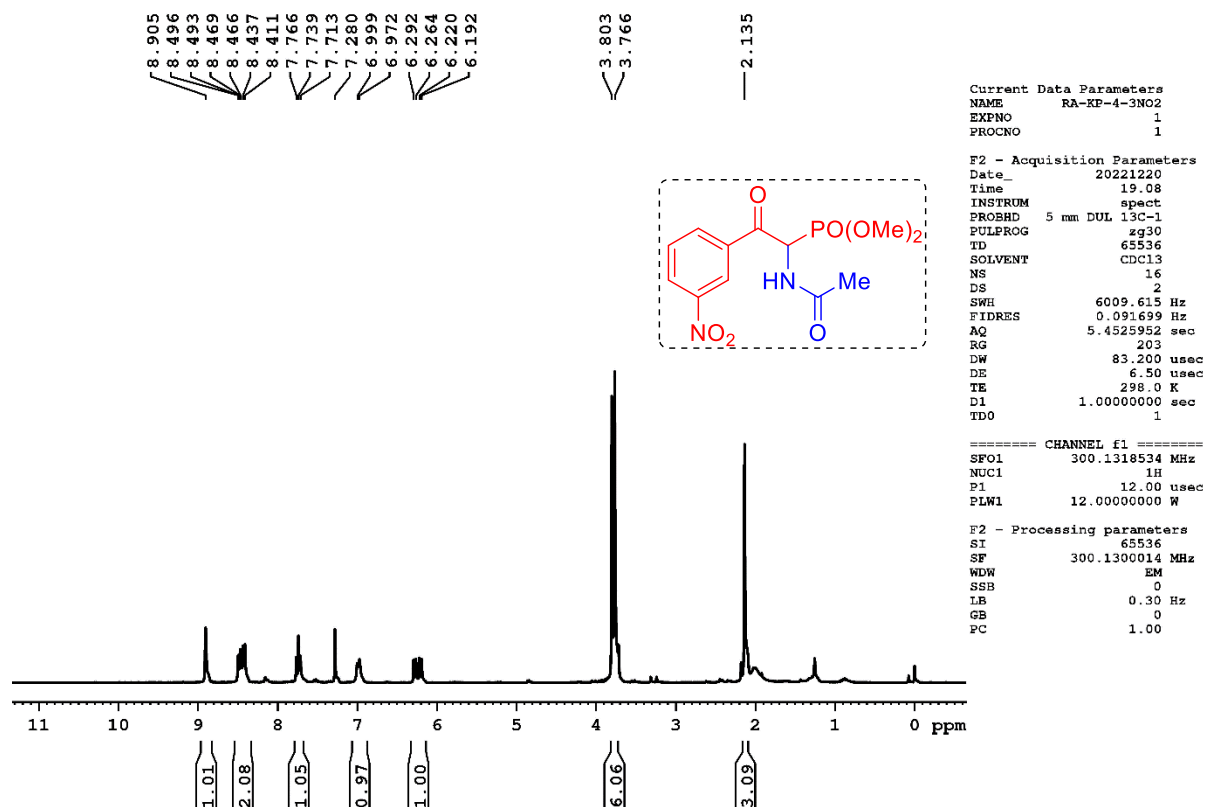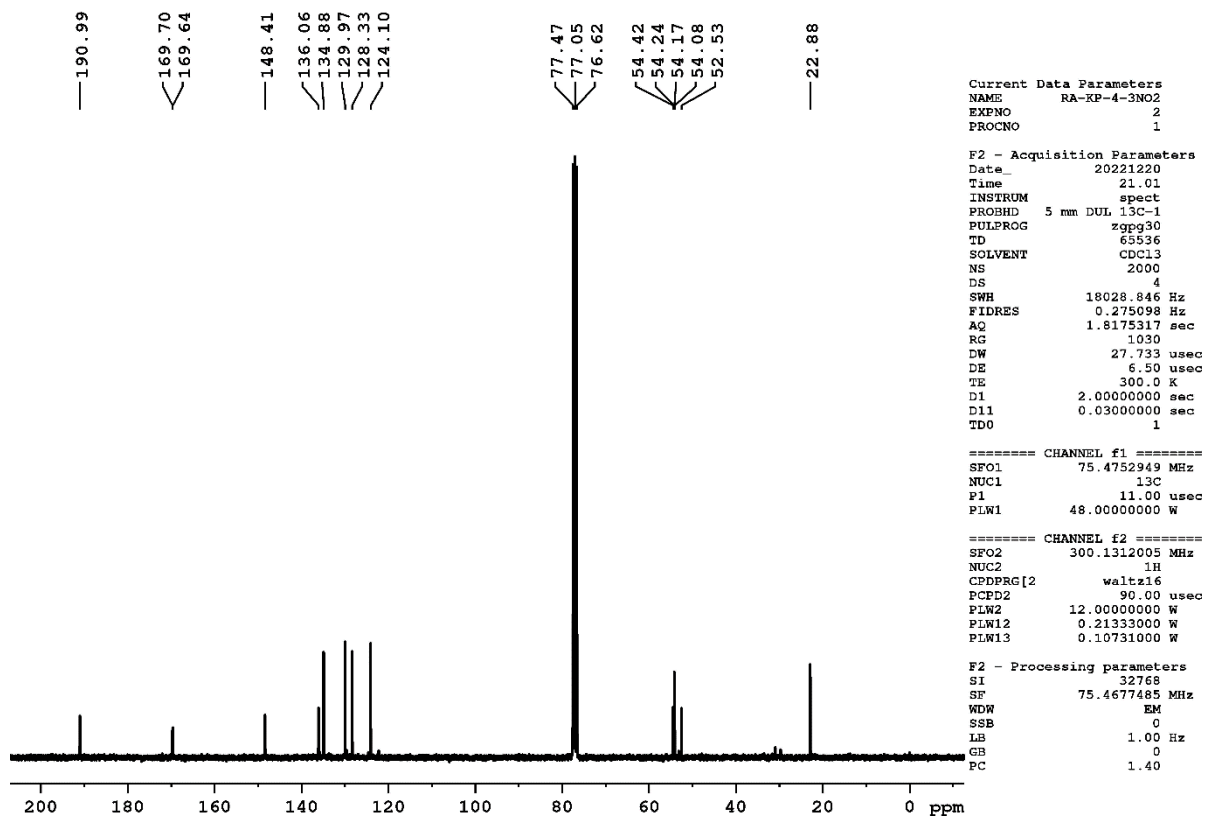

<sup>1</sup>H and <sup>13</sup>C NMR spectra of compound 4g

DR.RA

KP-4-3NO<sub>2</sub> 29 (1.081) AM2 (Ar,20000.0,556.28,0.00,LS 10)

1: TOF MS ES+  
2.04e5

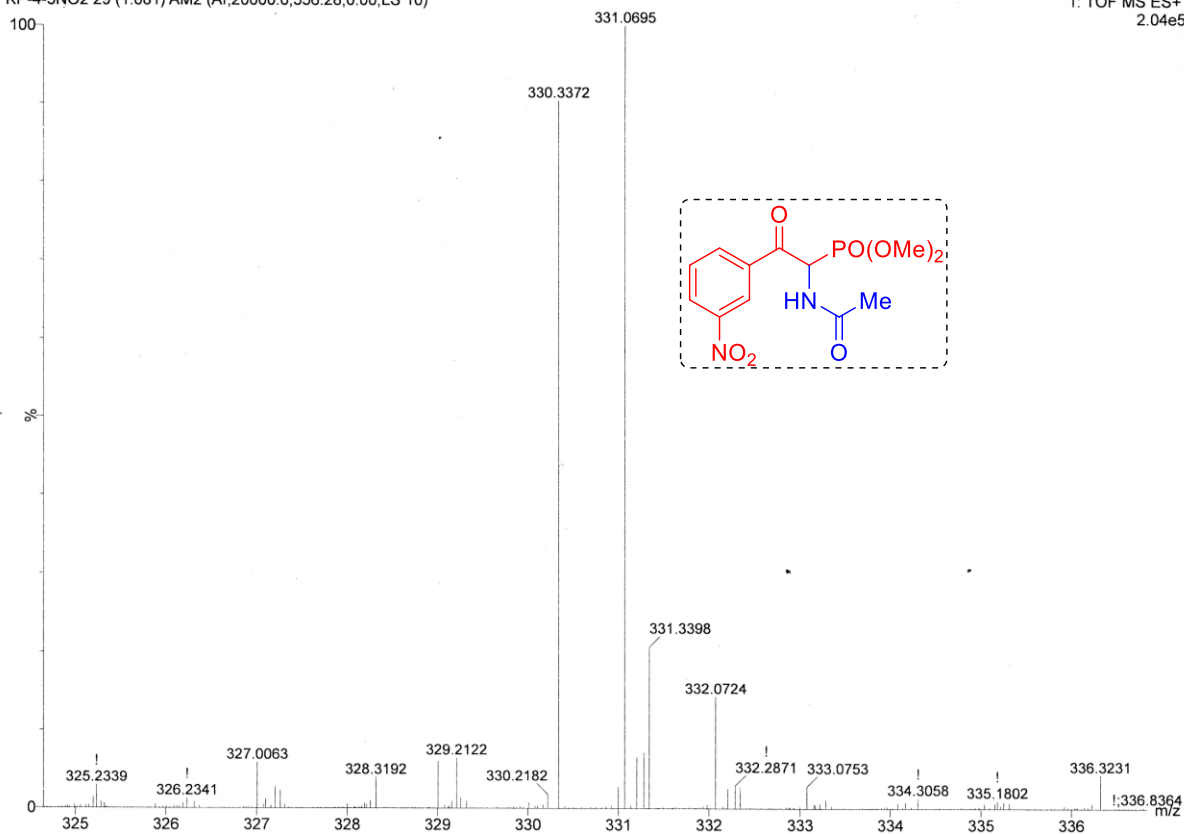

HRMS spectrum of compound 4g

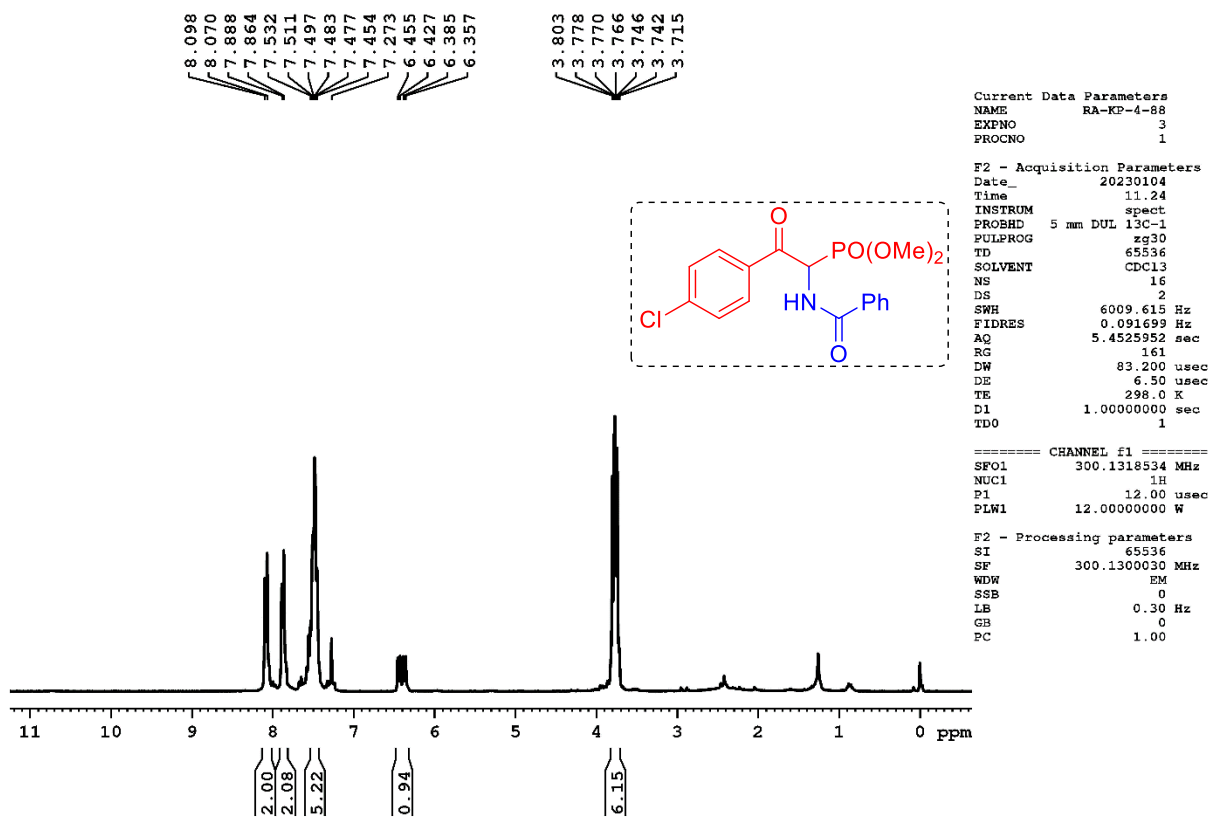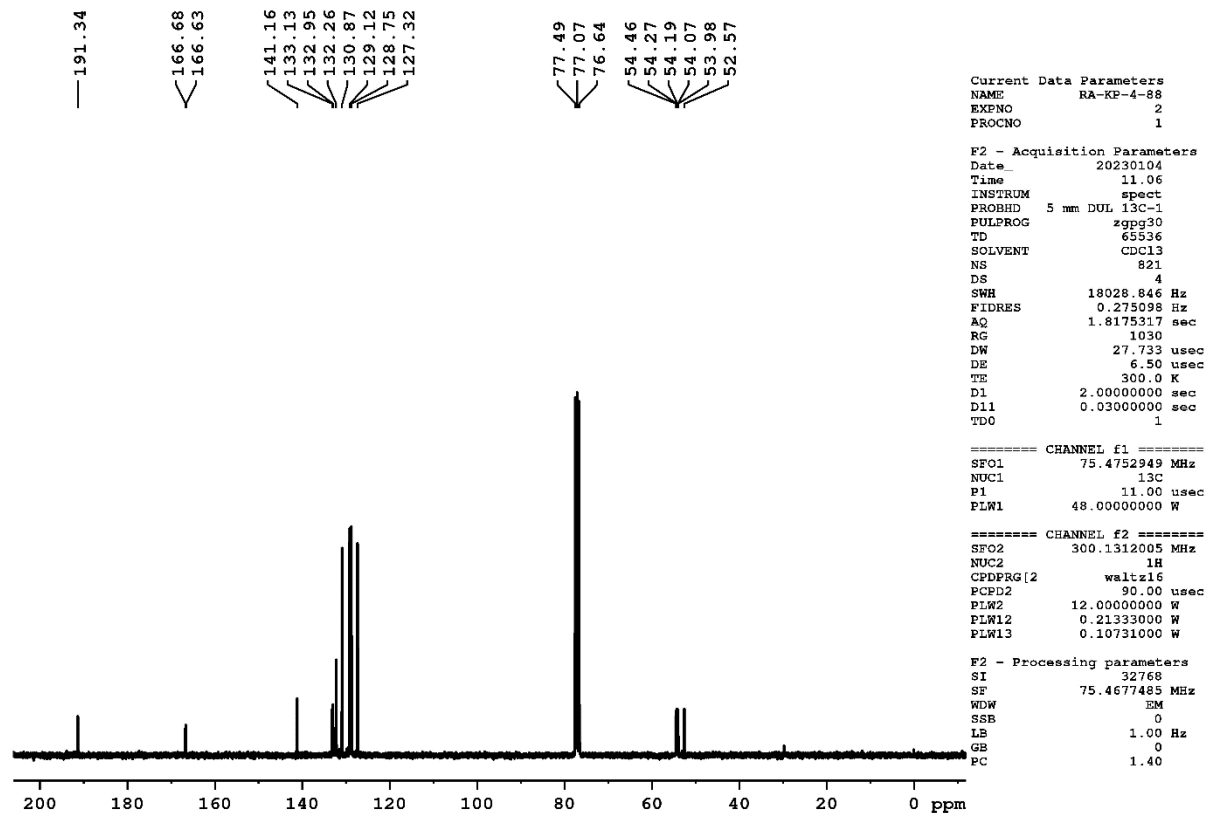

<sup>1</sup>H and <sup>13</sup>C NMR spectra of compound 4h

DR.RA  
KP-4-88 21 (0.788) AM2 (Ar,20000.0,556.28,0.00,LS 10)

1: TOF MS ES+  
3.03e5

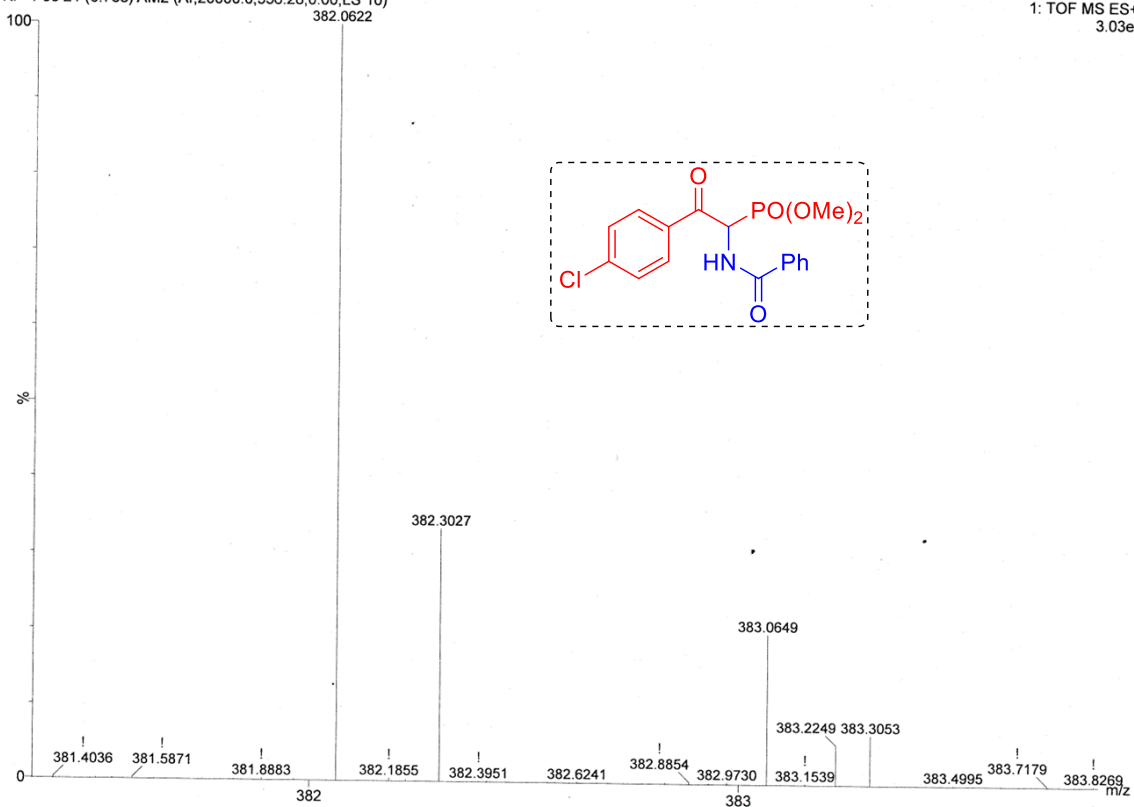

**HRMS spectrum of compound 4h**

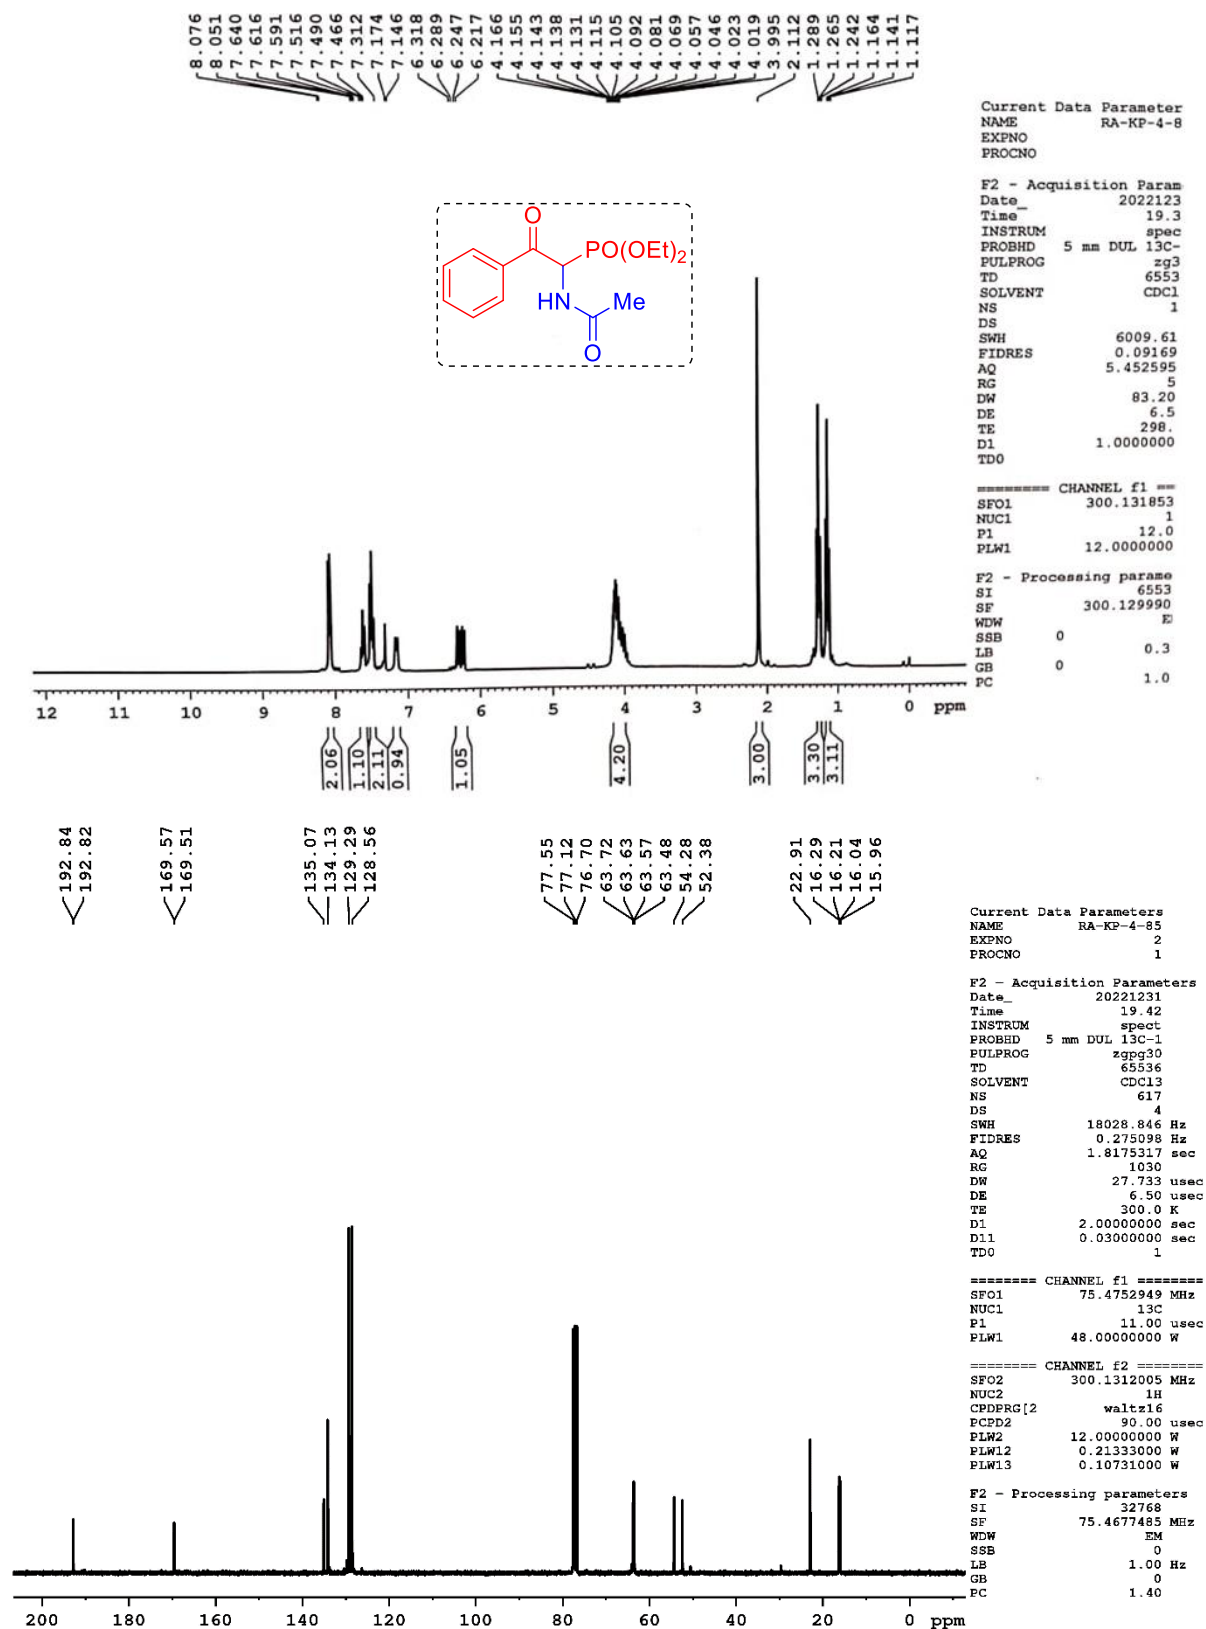

**<sup>1</sup>H and <sup>13</sup>C NMR spectra of compound 4i**

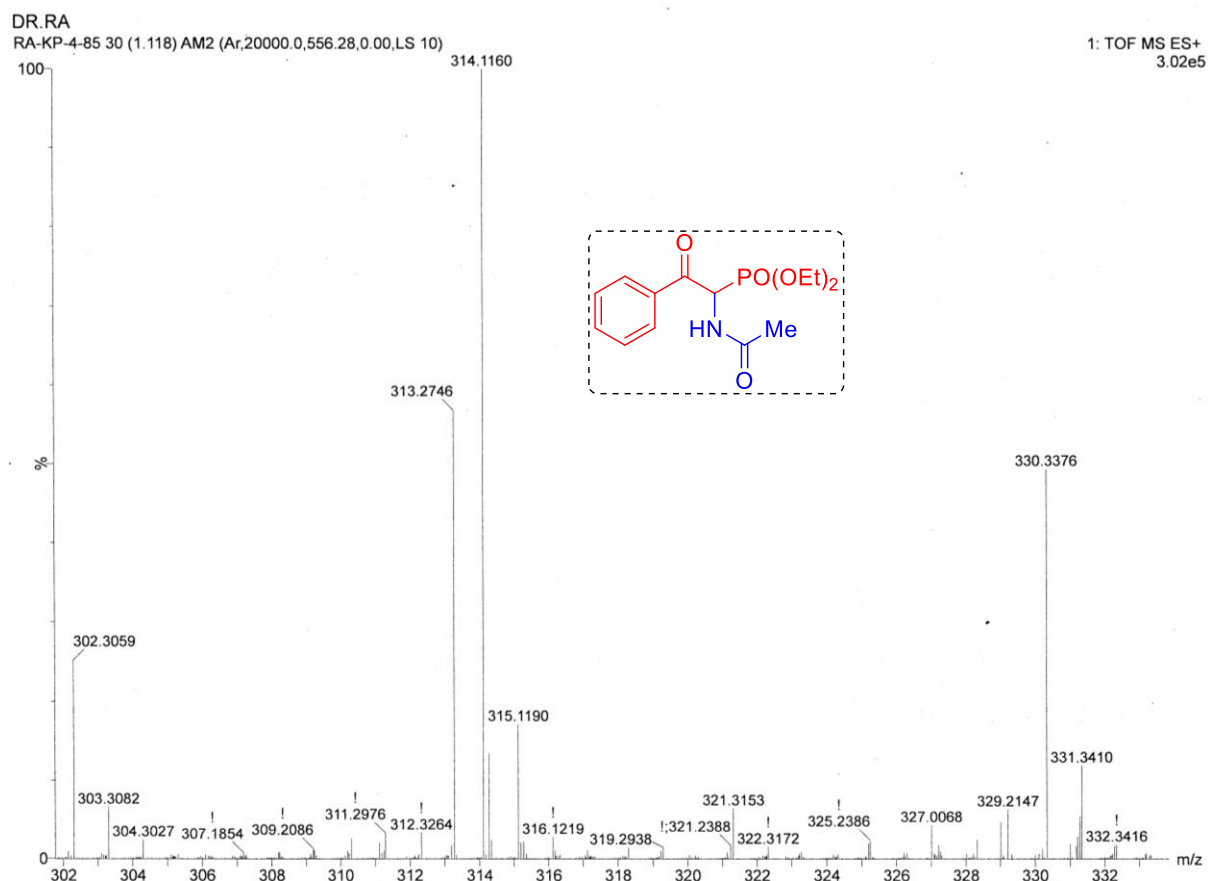

**HRMS spectrum of compound 4i**

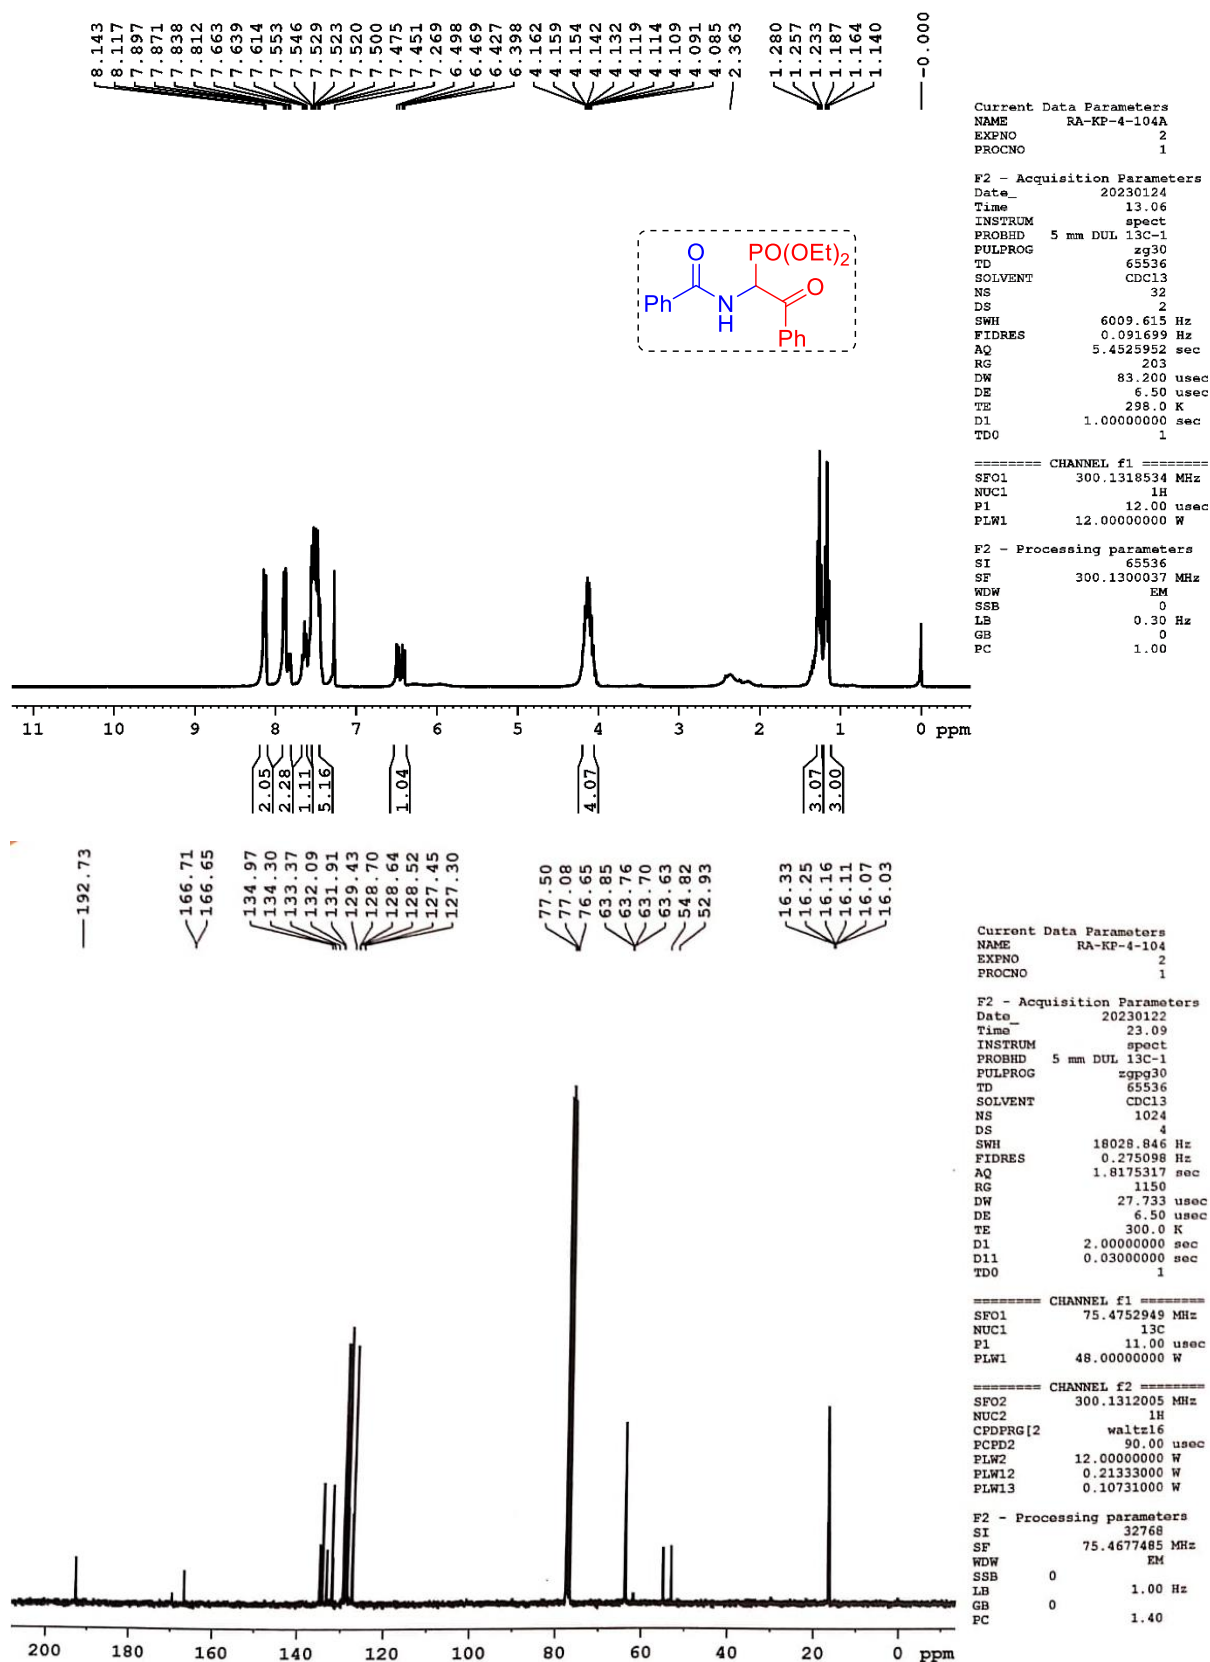

<sup>1</sup>H and <sup>13</sup>C NMR spectra of compound 4j

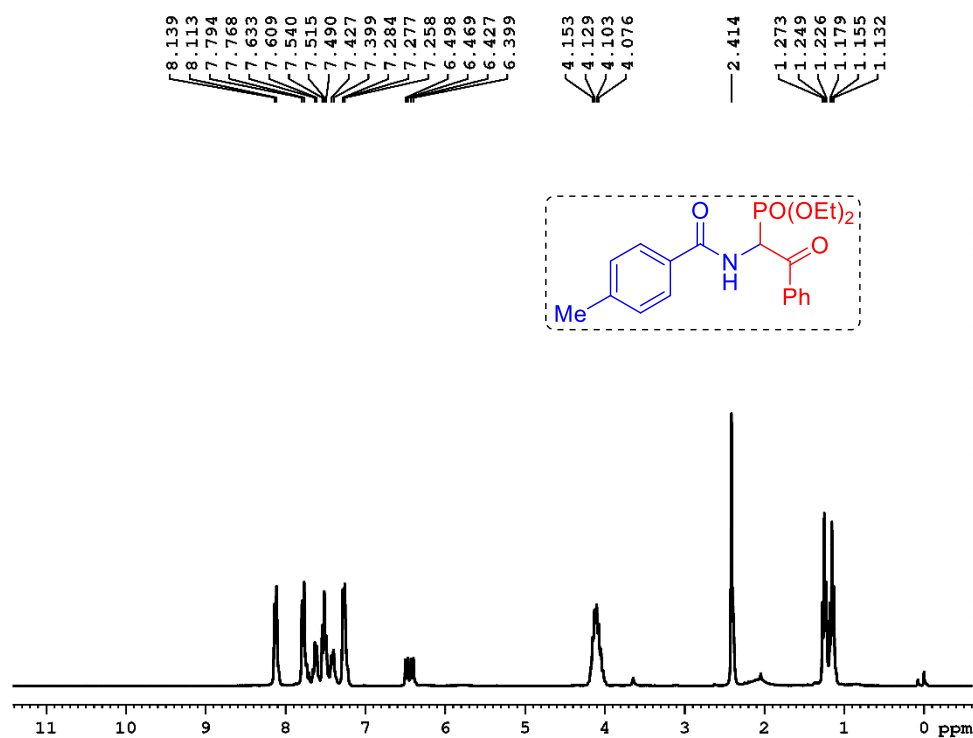

Current Data Parameters  
NAME RA-KP-4-108A  
EXPNO 5  
PROCNO 1

F2 - Acquisition Parameters  
Date\_ 20230208  
Time 22.52  
INSTRUM spect  
PROBHD 5 mm DUL 13C-1  
PULPROG zg30  
TD 65536  
SOLVENT CDCl3  
NS 16  
DS 2  
SWH 6009.615 Hz  
FIDRES 0.091699 Hz  
AQ 5.4525952 sec  
RG 144  
DW 83.200 usec  
DE 6.50 usec  
TE 298.0 K  
D1 1.00000000 sec  
TD0 1

===== CHANNEL f1 =====  
SFO1 300.1318534 MHz  
NUC1 1H  
P1 12.00 usec  
PLW1 12.00000000 W

F2 - Processing parameters  
SI 65536  
SF 300.1300031 MHz  
WDW EM  
SSB 0  
LB 0.30 Hz  
GB 0  
PC 1.00

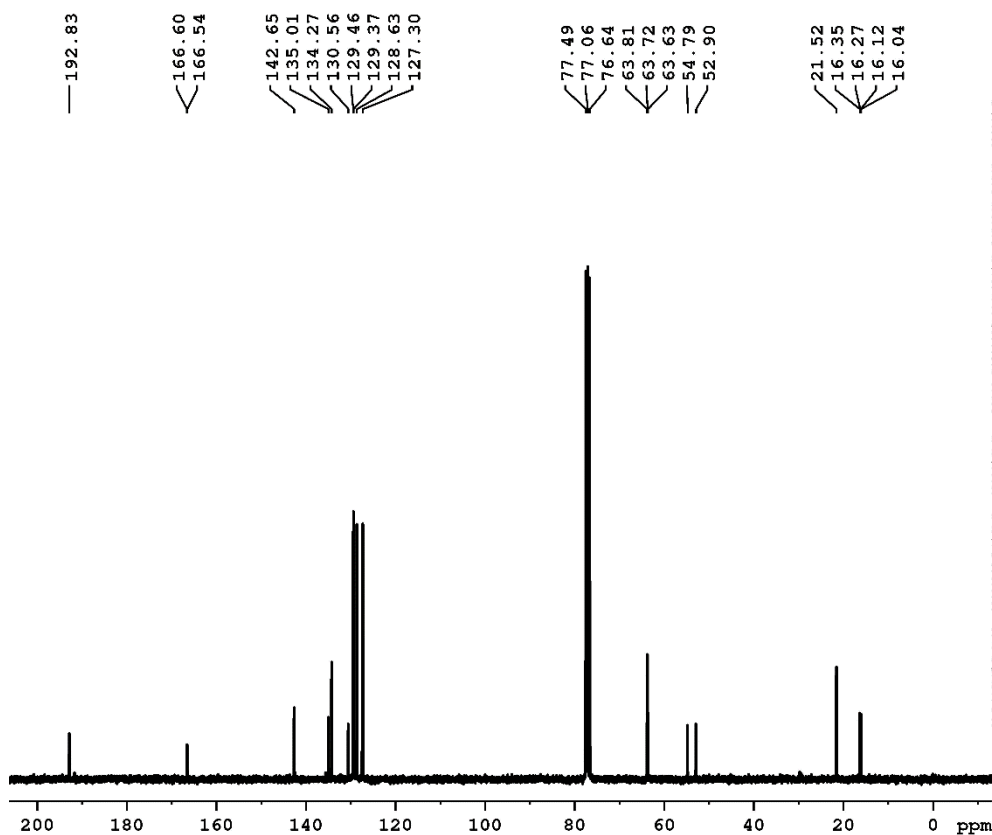

Current Data Parameters  
NAME RA-KP-4-108A  
EXPNO 6  
PROCNO 1

F2 - Acquisition Parameters  
Date\_ 20220208  
Time 23.51  
INSTRUM spect  
PROBHD 5 mm DUL 13C-1  
PULPROG zgpg30  
TD 65536  
SOLVENT CDCl3  
NS 1024  
DS 4  
SWH 18028.846 Hz  
FIDRES 0.275098 Hz  
AQ 1.8175317 sec  
RG 1030  
DW 27.733 usec  
DE 6.50 usec  
TE 300.0 K  
D1 2.00000000 sec  
D11 0.03000000 sec  
TD0 1

===== CHANNEL f1 =====  
SFO1 75.4752949 MHz  
NUC1 13C  
P1 11.00 usec  
PLW1 48.00000000 W

===== CHANNEL f2 =====  
SFO2 300.1312005 MHz  
NUC2 1H  
PCPDPRG2 waltz16  
PCPD2 90.00 usec  
PLW2 12.00000000 W  
PLW12 0.21333000 W  
PLW13 0.10731000 W

F2 - Processing parameters  
SI 32768  
SF 75.4677485 MHz  
WDW EM  
SSB 0  
LB 1.00 Hz  
GB 0  
PC 1.40

<sup>1</sup>H and <sup>13</sup>C NMR spectra of compound 4k



DR.RA  
KP-4-108A 20 (0.751) AM2 (Ar,20000.0,556.28,0.00,LS 10)

1: TOF MS ES+  
5.45e5

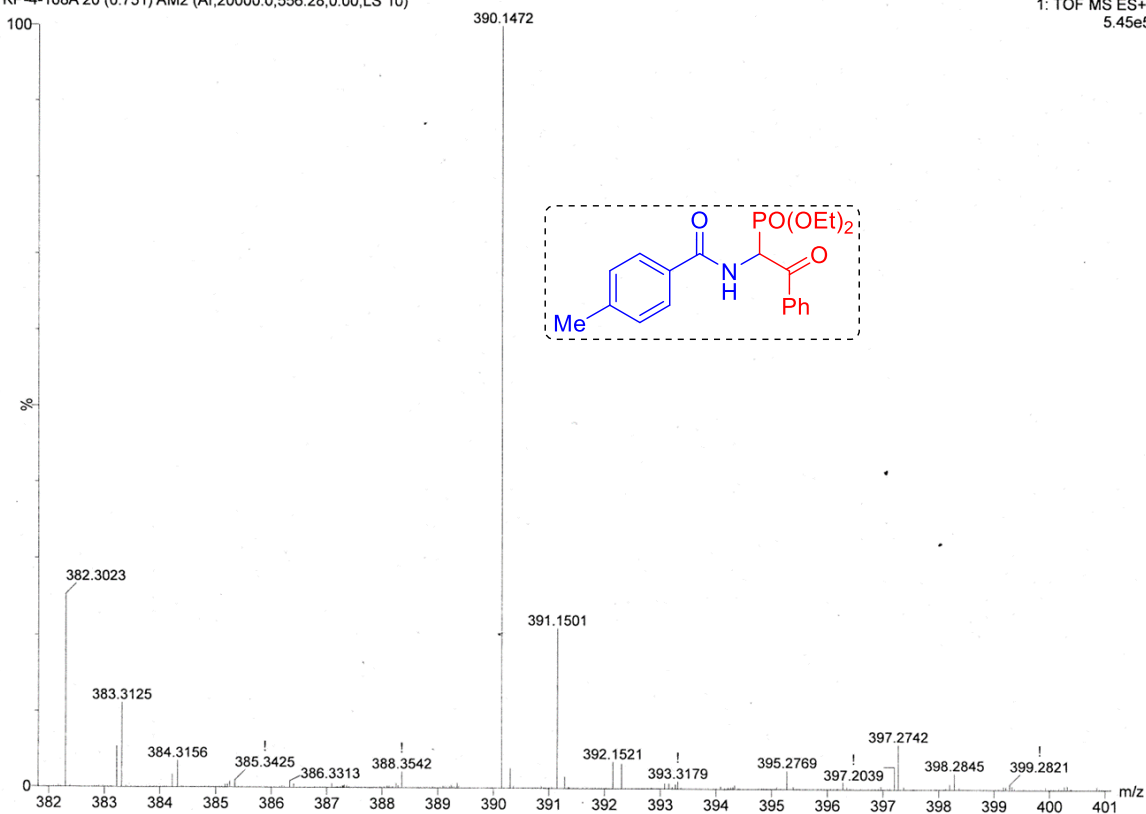

**HRMS spectrum of compound 4k**
